# Supplementary material for: Self-rated health trajectory and frailty among community-dwelling older adults: evidence from the Taiwan Longitudinal Study on Aging (TLSA)
Source: PubMed Central journal article supplement — BMJ Open. 2021 Aug 6;11(8):e049795. doi: 10.1136/bmjopen-2021-049795 (PMC8351513; doi:10.1136/bmjopen-2021-049795), 2021-08-06
Supplement: bmjopen-2021-049795.draft_revisions.pdf [file bmjopen-2021-049795.draft_revisions.pdf]

# BMJ Open

BMJ Open is committed to open peer review. As part of this commitment we make the peer review history of every article we publish publicly available.

When an article is published we post the peer reviewers' comments and the authors' responses online. We also post the versions of the paper that were used during peer review. These are the versions that the peer review comments apply to.

The versions of the paper that follow are the versions that were submitted during the peer review process. They are not the versions of record or the final published versions. They should not be cited or distributed as the published version of this manuscript.

BMJ Open is an open access journal and the full, final, typeset and author-corrected version of record of the manuscript is available on our site with no access controls, subscription charges or pay-per-view fees (<http://bmjopen.bmj.com>).

If you have any questions on BMJ Open's open peer review process please email [info.bmjopen@bmj.com](mailto:info.bmjopen@bmj.com)

# BMJ Open

## Trajectory of self-rated health on the incidence of frailty among community-dwelling older adults: evidence from the Taiwan Longitudinal Study on Aging (TLSA)

|                               |                                                                                                                                                                                                                                                                                                                                                                                                                                                                                                                                                                                                                                                                                                                                                                                                                                                             |
|-------------------------------|-------------------------------------------------------------------------------------------------------------------------------------------------------------------------------------------------------------------------------------------------------------------------------------------------------------------------------------------------------------------------------------------------------------------------------------------------------------------------------------------------------------------------------------------------------------------------------------------------------------------------------------------------------------------------------------------------------------------------------------------------------------------------------------------------------------------------------------------------------------|
| Journal:                      | <i>BMJ Open</i>                                                                                                                                                                                                                                                                                                                                                                                                                                                                                                                                                                                                                                                                                                                                                                                                                                             |
| Manuscript ID                 | bmjopen-2021-049795                                                                                                                                                                                                                                                                                                                                                                                                                                                                                                                                                                                                                                                                                                                                                                                                                                         |
| Article Type:                 | Original research                                                                                                                                                                                                                                                                                                                                                                                                                                                                                                                                                                                                                                                                                                                                                                                                                                           |
| Date Submitted by the Author: | 02-Feb-2021                                                                                                                                                                                                                                                                                                                                                                                                                                                                                                                                                                                                                                                                                                                                                                                                                                                 |
| Complete List of Authors:     | <p>Chu, Wei-Min ; Taichung Veterans General Hospital, Department of Family Medicine; National Yang-Ming University, School of Medicine<br/>         Ho, Hsin-En; Taichung Armed Forces General Hospital, Department of Family medicine; Chung Shan Medical University, Institution of Medicine<br/>         Yeh, Chih-Jung; Chung Shan Medical University, School of Public Health<br/>         Hsiao, Yu-han; Taichung Hospital, Department of Family Medicine; Chung Shan Medical University, School of Public Health<br/>         Hsu, Pi-Shan; Taichung Veterans General Hospital, Department of Family Medicine<br/>         Lee, Shu-Hsin; Chung Shan Medical University, School of Nursing<br/>         Lee, Meng-Chih ; Taichung Hospital, Department of Family Medicine; National Health Research Institutes, Institute of Population Sciences</p> |
| Keywords:                     | GERIATRIC MEDICINE, PUBLIC HEALTH, EPIDEMIOLOGY                                                                                                                                                                                                                                                                                                                                                                                                                                                                                                                                                                                                                                                                                                                                                                                                             |
|                               |                                                                                                                                                                                                                                                                                                                                                                                                                                                                                                                                                                                                                                                                                                                                                                                                                                                             |

SCHOLARONE™  
Manuscripts

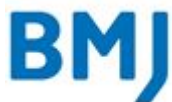

I, the Submitting Author has the right to grant and does grant on behalf of all authors of the Work (as defined in the below author licence), an exclusive licence and/or a non-exclusive licence for contributions from authors who are: i) UK Crown employees; ii) where BMJ has agreed a CC-BY licence shall apply, and/or iii) in accordance with the terms applicable for US Federal Government officers or employees acting as part of their official duties; on a worldwide, perpetual, irrevocable, royalty-free basis to BMJ Publishing Group Ltd ("BMJ") its licensees and where the relevant Journal is co-owned by BMJ to the co-owners of the Journal, to publish the Work in this journal and any other BMJ products and to exploit all rights, as set out in our [licence](#).

The Submitting Author accepts and understands that any supply made under these terms is made by BMJ to the Submitting Author unless you are acting as an employee on behalf of your employer or a postgraduate student of an affiliated institution which is paying any applicable article publishing charge ("APC") for Open Access articles. Where the Submitting Author wishes to make the Work available on an Open Access basis (and intends to pay the relevant APC), the terms of reuse of such Open Access shall be governed by a Creative Commons licence – details of these licences and which [Creative Commons](#) licence will apply to this Work are set out in our licence referred to above.

Other than as permitted in any relevant BMJ Author's Self Archiving Policies, I confirm this Work has not been accepted for publication elsewhere, is not being considered for publication elsewhere and does not duplicate material already published. I confirm all authors consent to publication of this Work and authorise the granting of this licence.

**TITLE**

Trajectory of self-rated health on the incidence of frailty among community-dwelling older adults: evidence from the Taiwan Longitudinal Study on Aging (TLISA)

**AUTHOR and AFFLIATION**

Wei-Min Chu<sup>1,2,3</sup>, Hsin-En Ho<sup>4,5,6</sup>, Chih-Jung Yeh<sup>7</sup>, Yu-han Hsiao<sup>7,8</sup>, Pi-Shan Hsu<sup>1</sup>,  
Shu-Hsin Lee<sup>9,10</sup>, Meng-Chih Lee<sup>8,11</sup>

<sup>1</sup>Department of Family Medicine, Taichung Veterans General Hospital, Taichung, Taiwan

<sup>2</sup>School of Medicine, Chung Shan Medical University, Taichung, Taiwan

<sup>3</sup>School of Medicine, National Yang-Ming University, Taipei, Taiwan

<sup>4</sup>Department of Family medicine, Taichung Armed Force General Hospital, Taichung, Taiwan.

<sup>5</sup>Institute of Medicine, Chung Shan Medical University, Taichung, Taiwan

<sup>6</sup>National Defense Medical Center, Taipei, Taiwan

<sup>7</sup>School of Public Health, Chung Shan Medical University, Taichung, Taiwan

<sup>8</sup>Department of Family Medicine, Taichung Hospital, Ministry of Health and Welfare, Taichung, Taiwan

<sup>9</sup>School of Nursing, Chung Shan Medical University, Taichung, Taiwan

<sup>10</sup>Center for Education and Research on Geriatrics and Gerontology, Chung Shan Medical University, Taichung, Taiwan

<sup>11</sup>Institute of Population Sciences, National Health Research Institutes, Miaoli County, Taiwan

**Corresponding author:**

Meng-Chih Lee, M.D., Ph.D., MPH

Department of Family Medicine

Taichung Hospital, Ministry of Health and Welfare

Taichung, Taiwan

Postal Address: No. 199, Sec. 1, Sanmin Rd., West Dist., Taichung City 403,

Taiwan (R.O.C.)

Phone: 04-22294411

mengchihlee@gmail.com

**Word counts:** 2429

## ABSTRACT

**Objectives:** Self-rated health (SRH) is an assessment and predictor of health based on an individual's general condition, however evidence of the value of SRH for predicting frailty remains scarce for older Asian adults. This study aimed to evaluate the relationship between self-rated health (SRH) score trajectory and frailty among elderly individuals in Taiwan.

**Design:** An 8-year retrospective cohort study.

**Setting:** Data were retrieved from the Taiwan Longitudinal Study on Aging between 1999 to 2007.

**Participants:** Respondents aged 53 to 69-years-old who were not frail or disabled in 1999 ( $n=1956$ ).

**Primary and Secondary Outcome Measures:** Frailty was defined using the Fried criteria. The group-based trajectory model was used to estimate SRH trajectories. Logistic regression analysis was used to examine the associations between changes in SRH and frailty.

**Results:** Four SRH trajectory classes were identified across the 8-year follow-up: 232 participants (11.9%) were classified into the constantly poor SRH group, 1123 (57.4%) into the constantly fair SRH group, 335 (17.1%) into the constantly good SRH group, and 266 (13.4%) into the good-to-fair SRH group. After adjusting for

1  
2  
3  
4 gender, age, level of education, income, social participation, health behaviors and  
5  
6  
7 major comorbidities, age, poor income satisfaction, unemployment and constantly  
8  
9  
10 poor SRH were associated with increased risk of frailty, while constantly good SRH  
11  
12  
13 [OR 0.044, 95% CI (0.006-0.323)] and good-to-fair SRH [OR 0.192, 95% CI  
14  
15  
16 (0.059-0.625)] were associated with reduced risks of frailty.

17  
18  
19 **Conclusions:** Constantly poor SRH is associated with an increased risk of frailty in  
20  
21  
22 older age. SRH in older adults should be recognized as a predictive tool for future  
23  
24  
25 frailty. Diet and exercise interventions may help to prevent frailty among high-risk  
26  
27  
28 elderly individuals with constantly low SRH.

29  
30  
31  
32  
33  
34 **Strengths and Limitation of study:**

- 35  
36  
37 1. To the best of our knowledge, this is the first long-term study to investigate the  
38  
39  
40 relationship between SRH trajectory and frailty among Asian population based on  
41  
42  
43 a nationally representative sample.
- 44  
45  
46 2. Reporting bias could happen because all data were collected through  
47  
48  
49 self-reporting and not measured objectively.
- 50  
51  
52 3. Frailty was defined according to a modified phenotype definition, assessed by  
53  
54  
55 using questionnaire data.
- 56  
57  
58  
59  
60

1  
2  
3 **Key words:** self-rated health, frailty, trajectory, elderly  
4  
5  
6  
7  
8  
9  
10  
11  
12  
13  
14  
15  
16  
17  
18  
19  
20  
21  
22  
23  
24  
25  
26  
27  
28  
29  
30  
31  
32  
33  
34  
35  
36  
37  
38  
39  
40  
41  
42  
43  
44  
45  
46  
47  
48  
49  
50  
51  
52  
53  
54  
55  
56  
57  
58  
59  
60

For peer review only



## BACKGROUND

Aging has become a serious challenge globally in both Western and developed Asian countries. The World Health Organization define an aged society as a population in which people over 65-years-old comprise more than 14% of the total population.

According to the Department of Health of Taiwan, the proportion of people over 65 in Taiwan increased from 8.6% to 10.7% between 2000 and 2010 [1]. The Department of Development predict this number will rise to 20% by 2027 [2], which would represent the fastest rate of aging in the world. Due to the rapidly aging population, the annual crude mortality rate for Taiwanese citizens over 65 increased from 46.9% to 68.5% between 1981 to 2010 [1, 3].

Many key indicators can be used to predict the future health of the elderly, including the self-rated health (SRH) score. SRH is an assessment and predictor of health based on an individual's general condition and subjective feelings of their physical, psychological and social wellbeing, combined with objective measurements of health.

Several studies have demonstrated consistency between SRH and individual health status and shown SRH can predict future mortality, disability and other adverse health outcomes [4-11]. In recent years, frailty has been proven to be one of the most important key indicators of the health of the elderly in recent decades. Frailty is a geriatric condition characterized by increased vulnerability and decreased capacity to

1  
2  
3  
4 maintain homeostasis [12]. Frailty in later life has been proven to lead to a number of  
5  
6  
7 adverse health outcomes and a poor quality of life [13-17]. As frailty can be addressed  
8  
9  
10 by proper recognition and treatment, such as diet and exercise, it is important to  
11  
12  
13 identify risk factors for frailty in older adults [18]. Several studies have explored the  
14  
15  
16 relationship between SRH and frailty[19-21]. A population-based study of more than  
17  
18  
19 2,000 healthy participants conducted in Finland by Huohvanainen et al. (2016) found  
20  
21  
22 that SRH in midlife could predict frailty, prefrailty and mortality in later life [22].  
23  
24  
25 However, most of previous studies were implemented in Western countries, evidence  
26  
27  
28 of the value of SRH for predicting frailty remains scarce for older Asian adults,  
29  
30  
31 especially from long-term observation. The aim of this study was to explore the  
32  
33  
34 long-term relationships between SRH trajectories and future frailty in older  
35  
36  
37 Taiwanese adults using a national population cohort study.  
38  
39  
40  
41  
42

## 43 **METHODS**

### 44 *Data sources*

45  
46  
47 We retrieved data from the Taiwan Longitudinal Study in Aging (TLSA), a  
48  
49  
50 population-based, national representative study initiated by the Bureau of Health  
51  
52  
53 Promotion of Taiwan, and the Population Studies Center and the Institute of  
54  
55  
56 Gerontology at the University of Michigan in the United States. Data are collected  
57  
58  
59 from systematically selected representative samples of the Taiwanese population,  
60  
including institutionalized elderly people. Personal interviews are conducted by

1  
2  
3 highly trained interviewers. To ensure high data quality collection, careful supervision  
4 is provided during data collection and data processing is conducted by a professional  
5 data entry company.  
6  
7  
8  
9

10 The TLISA was started in 1989 and six waves of data collection had been completed  
11 by 2007. For this study, we used the 1999 sample, which included 2,130 subjects aged  
12 53–69-years-old in 1999. We followed-up this cohort for 8 years and used data from  
13 2007 to analyze outcomes. The Population Studies Center at the University of  
14 Michigan reviewed the representativeness of the completed sample; the analysis  
15 showed that the sample was highly representative, with a 90.6% response rate. Details  
16 of the study design have been described elsewhere [23-25].  
17  
18  
19  
20  
21  
22  
23  
24  
25  
26  
27  
28

### 29 *Study group identification*

30 We included the 1999 sample, which included 2,130 subjects aged 53–69-years-old in  
31 1999. Individuals who had developed frailty in 1999 or who had any functional  
32 disability in 1999 were excluded from the study. Thus, 1,956 subjects were included  
33 in the final analysis.  
34  
35  
36  
37  
38  
39  
40  
41

### 42 *Research variables*

43 For each eligible subject, we gathered data in 1999 on age, gender, level of education,  
44 marital status, income level, SRH, social participation, employment status, smoking,  
45 alcohol consumption, and chronic diseases. Level of education was classified into  
46 four groups: illiterate (0 years), elementary school (1–6 years), junior to senior high  
47 school (7–12 years), and college or above (> 12 years). Income level was determined  
48 by asking individuals how they felt about their income level. The possible answers  
49 were *very satisfied*, *satisfied*, *fair*, *unsatisfied*, and *very unsatisfied*. We classified the  
50  
51  
52  
53  
54  
55  
56  
57  
58  
59  
60

1  
2  
3 income levels as “good ” (rated *very satisfied, satisfied*) “fair” (rated *fair*) or “poor”  
4  
5 (*unsatisfied* or *very unsatisfied*). SRH was determined by asking individuals how they  
6  
7 rated their current health. Possible answers were *excellent, good, fair, poor, and very*  
8  
9 *poor*. We classified the individuals into three groups based on SRH: good (rated  
10  
11 *excellent* or *good*), fair (*fair*), or poor (*poor* or *very poor*). Individuals who had either  
12  
13 paid or voluntary work or who participated in community activities were considered  
14  
15 as having social participation. The individuals were classified into two groups based  
16  
17 on employment status in 1999: normally employed and unemployed. The number of  
18  
19 chronic diseases suffered by each individual was recorded, including hypertension,  
20  
21 diabetes, cardiovascular disease, stroke, cancer, chronic respiratory diseases, arthritis  
22  
23 or rheumatoid diseases, gastric diseases, hepatobiliary diseases, and kidney diseases.  
24  
25  
26 Data regarding frailty was collected in 2007 as the outcome measure. Frailty was  
27  
28 defined according to the Fried criteria [12]. Individuals who exhibited at least three of  
29  
30 five traits (i.e., shrinking, weakness, exhaustion, slowness, and low physical activity)  
31  
32 were considered frail. Individuals with only one or two of the five traits were regarded  
33  
34 as pre-frail. We used substitute evaluations for these five domains because we  
35  
36 retrieved data from questionnaires, and this modified frailty definition have been used  
37  
38 broadly and published before with validity [26-28]. The parameter decreased appetite  
39  
40 was used instead of body weight loss to represent nutritional status. Participants who  
41  
42 reported poor appetite often in the previous week were classified as having the trait of  
43  
44 shrinking. For mobility, we used walking/moving in and around the house instead of  
45  
46 gait speed. Participants who had difficulty or were unable to walk a distance of 200 to  
47  
48 300 m were considered slow. For strength, we used the parameter of lifting heavy  
49  
50 groceries instead of hand grip strength. Participants who had difficulty or were unable  
51  
52 to carry 12 kg of groceries were considered weak. For physical activity, we used the  
53  
54  
55  
56  
57  
58  
59  
60

1  
2  
3 duration of leisure time/physical activities per week instead of the level of physical  
4 activity. Participants who did not take a walk, hike or jog, do gardening, or participate  
5 in other outdoor activities at least once or twice a week were considered to have low  
6 activity. We used the questionnaire of the Center for Epidemiologic Studies  
7 Depression Scale (CES-D) to determine the level of energy. Participants who  
8 reported, “*I could not get going*” or “*I felt everything I did was an effort*” often or  
9 most of the time in the previous week were considered exhausted. Due to nearly all  
10 elderly approaching end-of-life have functional disability and frailty, we regarded  
11 those who deceased during study period as having frailty in our study[29]  
12  
13  
14  
15  
16  
17  
18  
19  
20  
21  
22  
23  
24  
25

### 26 *Statistical analysis*

27  
28  
29

30 A group-based analysis model was applied to determine the SRH trajectories. We  
31 employed the Bayesian Information Criterion to identify the most appropriate model  
32 groups[30]. Previous geriatric research studies have used this model[23, 27, 28, 31,  
33 32]. For the descriptive analysis, we used analysis of variance and the chi-square test  
34 to compare continuous and categorized variables, respectively. Logistic regression  
35 was used to analyze the relationship between SRH trajectories and frailty, with  
36 adjustments for age, gender, level of education, income level, marital status, number  
37 of chronic diseases, social participation, smoking, alcohol consumption, and  
38 employment status. Statistical significance was set at  $p < 0.05$ . All data were analyzed  
39 using SPSS (version 22.0, IBM, Chicago, IL, USA).  
40  
41  
42  
43  
44  
45  
46  
47  
48  
49  
50  
51  
52  
53  
54  
55  
56  
57  
58  
59  
60

### *Patient and Public Involvement*

Patients or the public were not involved in the design, or conduct, or reporting of our research. However, Taiwan Association of Gerontology and Geriatrics, who listens to and stands for geriatric patients, will help with dissemination plans of our research results.

## **RESULTS**

Table 1 shows the descriptive data for all subjects. A total of 1,956 subjects with an average age of 61.46 years were included in the final analysis. Most subjects had 1-6 years of education, had a fair income level, and were married. The average number of chronic diseases was 1.21. There were 232 participants (11.9%) in the constantly poor SRH group, 1123 participants (57.4%) in the constantly fair SRH group, 335 participants (17.1%) in the constantly good SRH group, and 266 participants (13.6%) in the good-to-fair SRH group (Figure 1). Age distribution, sex, level of education, income level, social participation, marriage status, alcohol consumption, and unemployment status were significantly different between each of the four SRH trajectory classes.

Univariate logistic regression of the associations between the demographic and clinical characteristics and frailty are presented in Table 2. All variables, except for marital status and smoking behavior, were significantly associated with frailty.

1  
2  
3  
4 Table 3 illustrates multivariate logistic regression regarding the relationship between  
5  
6  
7 SRH trajectories and frailty. After adjustments for relevant factors, including age,  
8  
9  
10 gender, level of education, income level, social participation, alcohol consumption  
11  
12  
13 behavior, number of chronic diseases, and unemployment status, logistic regression  
14  
15  
16 analysis revealed age, poor income satisfaction, unemployment and constantly poor  
17  
18  
19 SRH was associated with an increased risk of frailty [OR 3.091, 95% CI  
20  
21  
22 (2.036-4.692) for constantly poor SRH], while constantly good SRH [OR 0.044, 95%  
23  
24  
25 CI (0.006-0.323)] and good-to-fair SRH [OR 0.192, 95% CI (0.059-0.625)] were  
26  
27  
28 associated with a decreased risk of frailty compared to constantly fair SRH.  
29  
30  
31  
32  
33  
34  
35  
36  
37  
38  
39  
40  
41  
42  
43  
44  
45  
46  
47  
48  
49  
50  
51  
52  
53  
54  
55  
56  
57  
58  
59  
60

## 1 DISCUSSION

2 In this population cohort study, we created a trajectory-based model for 1,956  
3 Taiwanese adults aged 53–69-years-old in 1999. Based on their SRH trajectories over  
4 the 8-year follow-up, the cohort could be classified into four groups: constantly poor  
5 SRH, constantly fair SRH, constantly good SRH, and good-to fair SRH. Multivariate  
6 logistic regression demonstrated an elevated risk of frailty for the constantly poor  
7 SRH group. We also observed significant protective effects for the groups with  
8 constantly good SRH and good-to-fair SRH.

9 To the best of our knowledge, this is the first long-term study to investigate the  
10 relationship between SRH trajectory and frailty. Our results are consistent with  
11 previous studies which investigated SRH at single time point. Huohvanainen et al.  
12 (2016) found that poor SRH in midlife was associated with prefrailty, frailty and  
13 mortality in later life after 26 years of follow-up in Finland [22]. A short-term study  
14 of 22 institutionalized elderly individuals by Gijzel et al. (2017) found that variance in  
15 the SRH score time series was significantly higher in frail participants across physical,  
16 mental and social domains [33]. Baddour et al. (2019) reported that SRH correlated  
17 moderately with frailty and found that good-to-excellent SRH was predictive of  
18 non-frail status and preservation of activities of daily living (ADL) [34].

19 We believe this study provides strong evidence of a causal relationship between SRH  
20 and frailty. First, this study was a well-designed cohort study with nationally  
21 representative subjects and we excluded those who had disability and frailty at  
22 baseline. Second, a significantly elevated risk of frailty was observed in the poor SRH  
23 group, even after adjusting for confounding factors related to frailty, including age,  
24 gender, level of education, income level, marital status, major disease, health  
25 behaviors, social participation, and employment status in multivariate regression



1  
2  
3 1 analysis. Third, in analysis of the relationship between SRH trajectory and frailty, the  
4  
5 2 constantly poor SRH group had an elevated risk of frailty, and significant protective  
6  
7 3 effects were observed for the constantly good SRH and good-to-fair SRH groups.  
8  
9 4 Thus, a causal relationship may exist between SRH and frailty.  
10  
11 5 However, some studies stated that the relationship between SRH and frailty may be in  
12  
13 6 different direction. Pinto et al. discovered that self-rated health is a mediator variable  
14  
15 7 between physical and mental health, including frailty with life satisfaction[35]. The  
16  
17 8 reasons could be that low level of daily activities prevent elderly from participating  
18  
19 9 community activities, thus lead to poor subjective health and life satisfaction. Our  
20  
21 10 study showed that constantly poor SRH would lead to increased incidence of frailty,  
22  
23 11 and we believed that this causal relationship was true, because several studies have  
24  
25 12 identified mechanisms that may possibly link SRH to frailty. Dysregulation of  
26  
27 13 neuroendocrine processes and the immune system may lead to further vulnerability  
28  
29 14 and lower resistance [36], and previous studies showed that inflammatory responses  
30  
31 15 are related to SRH. Christian et al. (2011) found that poorer SRH was associated with  
32  
33 16 elevated serum inflammatory markers, such as IL-6 and CRP, among generally  
34  
35 17 healthy older adults [37]. These inflammatory markers have been associated with  
36  
37 18 frailty. Low physical activity could also be a factor. Granger et al. (2017) reported that  
38  
39 19 high levels of physical activity were positively associated with self-rated 'good  
40  
41 20 health' status in European adolescents [38]. Additionally, Savela et al. (2013) found  
42  
43 21 that a higher level of physical activity from midlife onwards was strongly associated  
44  
45 22 with a lower risk of frailty in old age [39]. These studies suggested that the  
46  
47 23 relationship between SRH and frailty is real under multifactorial mechanism. Further  
48  
49 24 investigation is warranted to explore the intervention to prevent frailty for those  
50  
51 25 people whose SRH are poor, and its cost-effectiveness.  
52  
53  
54  
55  
56  
57  
58  
59  
60

## 1 *Strengths and Limitations*

2 This study has several advantages. First, this eight-year retrospective cohort study was  
3 based on a nationally representative sample with extremely high survey response  
4 rates. The database was based on a large, randomly selected population; thus, external  
5 validity is high. Second, our analysis of SRH trajectory as a predictor of frailty  
6 strengthens the evidence of a causal relationship between SRH and frailty. Moreover,  
7 the study design of trajectory-based model analysis minimized the possibility of  
8 misclassification bias, as SRH can change over time. Third, we adjusted for numerous  
9 confounding factors, including age, gender, level of education, income level, marital  
10 status, major disease, health behaviors, social participation, and unemployment status.  
11 However, this study also has several limitations. First, all data were collected through  
12 self-reporting and not measured objectively, which could result in reporting bias.  
13 Additionally, proxy respondents completed the follow-up questionnaire for subjects  
14 who were severely ill, which may possibly generate reporting bias. Secondly, we used  
15 serial SRH reports, though some participants may have experienced low SRH due to  
16 unidentified causes. For example, a subject may feel poor SRH due to health reasons.  
17 However, we attempted to address this possibility by excluding people with frailty  
18 and/or disability at baseline, as both frailty and/or disability could substantially affect  
19 the outcome. The design of this study also helped to eliminate the possibility of  
20 reverse causality. We also adjusted for a number of major chronic diseases to reduce  
21 the influence of bias. Because the study was conducted in Taiwan, generalisation of  
22 the results to other ethnic group should be made with caution.

## 23 24 **CONCLUSION**

1  
2  
3 1 Poor SRH in older adults is associated with a higher risk of frailty in the future, and  
4  
5 2 constantly poor SRH possesses more risk of frailty in the elderly. Moreover,  
6  
7 3 maintaining stable, good SRH may help to prevent frailty in later life. Thus, we  
8  
9 4 suggest governments should design and implement programs to regularly screen SRH  
10  
11 5 in older adults.. Further studies are necessary to define practical strategies to reduce  
12  
13 6 the risk of disability and death among older adults with constantly poor SRH and thus  
14  
15 7 improve the quality of life of elderly people.  
16  
17  
18  
19  
20  
21  
22  
23  
24  
25  
26  
27  
28  
29  
30  
31  
32  
33  
34  
35  
36  
37  
38  
39  
40  
41  
42  
43  
44  
45  
46  
47  
48  
49  
50  
51  
52  
53  
54  
55  
56  
57  
58  
59  
60

8

1  
2  
3 **FIGURE**

4  
5  
6 **Figure 1.** Flow chart of the study design<sup>1</sup>

7  
8  
9  
10  
11  
12  
13  
14  
15  
16  
17  
18  
19  
20  
21  
22  
23  
24  
25  
26  
27  
28  
29  
30  
31  
32  
33  
34  
35  
36  
37  
38  
39  
40  
41  
42  
43  
44  
45  
46  
47  
48  
49  
50  
51  
52  
53  
54  
55  
56  
57  
58  
59  
60

4  
5  
6  
7  
8  
9  
10  
11  
12  
13  
14  
15  
16  
17  
18  
19  
20  
21  
22  
23  
24  
25  
26  
27  
28  
29  
30  
31  
32  
33  
34  
35  
36  
37  
38  
39  
40  
41  
42  
43  
44  
45  
46  
47  
48  
49  
50  
51  
52  
53  
54  
55  
56  
57  
58  
59  
60

Flow chart showing the patient inclusion and exclusion processes, and the process of group-based trajectory analysis. SRH, self-rated health.

8  
9  
10  
11  
12  
13  
14  
15  
16  
17  
18  
19  
20  
21  
22  
23  
24  
25  
26  
27  
28  
29  
30  
31  
32  
33  
34  
35  
36  
37  
38  
39  
40  
41  
42  
43  
44  
45  
46  
47  
48  
49  
50  
51  
52  
53  
54  
55  
56  
57  
58  
59  
60

8  
9  
10  
11  
12  
13  
14  
15  
16  
17  
18  
19  
20  
21  
22  
23  
24  
25  
26  
27  
28  
29  
30  
31  
32  
33  
34  
35  
36  
37  
38  
39  
40  
41  
42  
43  
44  
45  
46  
47  
48  
49  
50  
51  
52  
53  
54  
55  
56  
57  
58  
59  
60

**Figure 2.** Trajectories of Self-Rated Health score between 1999 and 2007

10  
11  
12  
13  
14  
15  
16  
17  
18  
19  
20  
21  
22  
23  
24  
25  
26  
27  
28  
29  
30  
31  
32  
33  
34  
35  
36  
37  
38  
39  
40  
41  
42  
43  
44  
45  
46  
47  
48  
49  
50  
51  
52  
53  
54  
55  
56  
57  
58  
59  
60

10  
11  
12  
13  
14  
15  
16  
17  
18  
19  
20  
21  
22  
23  
24  
25  
26  
27  
28  
29  
30  
31  
32  
33  
34  
35  
36  
37  
38  
39  
40  
41  
42  
43  
44  
45  
46  
47  
48  
49  
50  
51  
52  
53  
54  
55  
56  
57  
58  
59  
60

After group-based trajectory analysis, there were 232 participants (11.9%, group 1) in the constant poor SRH group, 1123 participants (57.4%, group 2) in the constant fair SRH group, 335 participants (17.1%, group 3) were in the constant good SRH group, and 266 participants (13.6%, group 4) were in the good to fair SRH group.

1  
2  
3  
4  
5  
6  
7  
8  
9  
10  
11  
12  
13  
14  
15  
16  
17  
18  
19  
20  
21  
22  
23  
24  
25  
26  
27  
28  
29  
30  
31  
32  
33  
34  
35  
36  
37  
38  
39  
40  
41  
42  
43  
44  
45  
46  
47  
48  
49  
50  
51  
52  
53  
54  
55  
56  
57  
58  
59  
60

1 **ABBREVIATIONS**

2 SRH Self-rated Health

3 TLSA Taiwan Longitudinal Study on Aging

4 CES-D Center for Epidemiologic Studies Depression Scale

5 ADL Activities of Daily Living

6

For peer review only

## 1 **DECLARATIONS**

### 2 **Ethics approval and consent to participate**

3 The current study was approved by the Institutional Review Board of Health  
4 Promotion Administration, Ministry of Health and Warfare. (Approval no.  
5 BHP-2007-002). Before recruitment, all participants received a proper explanation  
6 about the study and provided consent for inclusion in the study. Participants who  
7 could read and write signed the written consent documents; those who could not read  
8 nor write impressed the name stamps or handprint with the assistance of their family  
9 members. In addition, legal guardian/representative provided consent on behalf of the  
10 participants with cognitive decline or stroke

### 12 **Consent for publication**

13 Not applicable.

### 15 **Availability of data and materials**

16 The datasets used and analyzed during the current study are not publicly available,  
17 but are available from the corresponding author on reasonable request with the  
18 permission of the Ministry of Health and Welfare, Taiwan.

### 20 **Competing interests**

21 The authors declare no conflicts of interests.

### 23 **Funding**

24 This work was supported by Ministry of Health and Welfare, Taiwan (Grant number:  
25 M06M2346 awarded to M.-C.L.).

1  
2  
3 1  
45 2 **Author Contributions**  
6

7 3 Each author's individual contributions: Meng-Chih Lee conceived of the study and  
8 supervised all aspects of its implementation. Wei-Min Chu completed the analyses  
9 4 and drafted the content. Yu-han Hsiao, Shu-Hsin Lee and Pi-Shan Hsu assisted with  
10 5 the study design and revised the content. Hsin-En Ho and Chih-Jung Yeh assisted  
11 6 with the statistical analysis and revised the content. All authors helped to  
12 7 conceptualize ideas, interpret findings, and review drafts of the manuscript.  
13 8

9

10 10 **Acknowledgements**

11 11 We thank our colleagues from Chun Shan Medical University, Taichung, Taiwan for  
12 12 providing supports in statistical analysis. The sponsor has no role in the design,  
13 13 methods, subject recruitment, data collections, analysis and preparation of paper.

1  
2  
3  
4  
5  
6  
7  
8  
9  
10  
11  
12  
13  
14  
15  
16  
17  
18  
19  
20  
21  
22  
23  
24  
25  
26  
27  
28  
29  
30  
31  
32  
33  
34  
35  
36  
37  
38  
39  
40  
41  
42  
43  
44  
45  
46  
47  
48  
49  
50  
51  
52  
53  
54  
55  
56  
57  
58  
59  
60

## 1 REFERENCES

- 2 1. Department of Health EY T: **Taiwan public health report 2017**. 2018.
- 3 2. National Development Council T: **Population projections for Taiwan: 2018-2065**. 2018.
- 4 3. Department of Health EY T: **The statistical analysis of mortality in 2010**. 2011.
- 5 4. Wu S, Wang R, Zhao Y, Ma X, Wu M, Yan X, He J: **The relationship between self-rated health and objective health status: a population-based study**. *BMC public health* 2013, **13**:320.
- 6 5. Bopp M, Braun J, Gutzwiller F, Faeh D: **Health risk or resource? Gradual and independent association between self-rated health and mortality persists over 30 years**. *PloS one* 2012, **7**(2):e30795.
- 7 6. Giltay EJ, Vollaard AM, Kromhout D: **Self-rated health and physician-rated health as independent predictors of mortality in elderly men**. *Age and ageing* 2012, **41**(2):165-171.
- 8 7. Halford C, Wallman T, Welin L, Rosengren A, Bardel A, Johansson S, Eriksson H, Palmer E, Wilhelmsen L, Svardsudd K: **Effects of self-rated health on sick leave, disability pension, hospital admissions and mortality. A population-based longitudinal study of nearly 15,000 observations among Swedish women and men**. *BMC public health* 2012, **12**:1103.
- 9 8. Jylha M: **What is self-rated health and why does it predict mortality? Towards a unified conceptual model**. *Social science & medicine (1982)* 2009, **69**(3):307-316.
- 10 9. Mavaddat N, Kinmonth AL, Sanderson S, Surtees P, Bingham S, Khaw KT: **What determines Self-Rated Health (SRH)? A cross-sectional study of SF-36 health domains in the EPIC-Norfolk cohort**. *Journal of epidemiology and community health* 2011, **65**(9):800-806.
- 11 10. Sargent-Cox KA, Anstey KJ, Luszcz MA: **The choice of self-rated health measures matter when predicting mortality: evidence from 10 years follow-up of the Australian longitudinal study of ageing**. *BMC geriatrics* 2010, **10**:18.
- 12 11. Stenholm S, Pentti J, Kawachi I, Westerlund H, Kivimaki M, Vahtera J: **Self-rated health in the last 12 years of life compared to matched surviving controls: the Health and Retirement Study**. *PloS one* 2014, **9**(9):e107879.
- 13 12. Fried LP, Tangen CM, Walston J, Newman AB, Hirsch C, Gottdiener J, Seeman T, Tracy R, Kop WJ, Burke G *et al*: **Frailty in older adults: evidence for a phenotype**. *The journals of gerontology Series A, Biological sciences and medical sciences* 2001, **56**(3):M146-156.
- 14 13. Bartley MM, Geda YE, Christianson TJ, Pankratz VS, Roberts RO, Petersen RC: **Frailty and Mortality Outcomes in Cognitively Normal Older People: Sex Differences in a Population-Based Study**. *Journal of the American Geriatrics Society* 2016, **64**(1):132-137.
- 15 14. At J, Bryce R, Prina M, Acosta D, Ferri CP, Guerra M, Huang Y, Rodriguez JJ, Salas A, Sosa AL *et al*: **Frailty and the prediction of dependence and mortality in low- and middle-income countries: a 10/66 population-based cohort study**. *BMC medicine* 2015, **13**:138.



- 1  
2  
3  
4  
5  
6  
7  
8  
9  
10  
11  
12  
13  
14  
15  
16  
17  
18  
19  
20  
21  
22  
23  
24  
25  
26  
27  
28  
29  
30  
31  
32  
33  
34  
35  
36  
37  
38  
39  
40  
41  
42  
43  
44  
45  
46  
47  
48  
49  
50  
51  
52  
53  
54  
55  
56  
57  
58  
59  
60
- 1 15. Lin SY, Lee WJ, Chou MY, Peng LN, Chiou ST, Chen LK: **Frailty Index Predicts All-Cause Mortality for Middle-Aged and Older Taiwanese: Implications for Active-Aging Programs.** *PloS one* 2016, **11**(8):e0161456.
  - 2 16. Kulmala J, Nykanen I, Hartikainen S: **Frailty as a predictor of all-cause mortality in older men and women.** *Geriatrics & gerontology international* 2014, **14**(4):899-905.
  - 3 17. Vermeiren S, Vella-Azzopardi R, Beckwee D, Habbig AK, Scafoglieri A, Jansen B, Bautmans I: **Frailty and the Prediction of Negative Health Outcomes: A Meta-Analysis.** *Journal of the American Medical Directors Association* 2016, **17**(12):1163.e1161-1163.e1117.
  - 4 18. Walston J, Buta B, Xue QL: **Frailty Screening and Interventions: Considerations for Clinical Practice.** *Clinics in geriatric medicine* 2018, **34**(1):25-38.
  - 5 19. Franse CB, van Grieken A, Qin L, Melis RJF, Rietjens JAC, Raat H: **Socioeconomic inequalities in frailty and frailty components among community-dwelling older citizens.** *PloS one* 2017, **12**(11):e0187946.
  - 6 20. Lau BH, Kwan J, Cheung KS: **Overlap of Frailty, Comorbidity, Disability, and Poor Self-Rated Health in Community-Dwelling Near-Centenarians and Centenarians.** *Journal of the American Geriatrics Society* 2016, **64**(4):900-901.
  - 7 21. Obaidi MA, Giri S, Mir N, Kenzik K, McDonald AM, Smith CY, Gbolahan OB, Paluri RK, Bhatia S, Williams GR: **Use of self-rated health to identify frailty and predict mortality in older adults with cancer. Results from the care study.** *Journal of Clinical Oncology* 2020, **38**(15\_suppl):12046-12046.
  - 8 22. Huohvanainen E, Strandberg AY, Stenholm S, Pitkala KH, Tilvis RS, Strandberg TE: **Association of Self-Rated Health in Midlife With Mortality and Old Age Frailty: A 26-Year Follow-Up of Initially Healthy Men.** *The journals of gerontology Series A, Biological sciences and medical sciences* 2016, **71**(7):923-928.
  - 9 23. Liang J, Wang CN, Xu X, Hsu HC, Lin HS, Lin YH: **Trajectory of functional status among older Taiwanese: Gender and age variations.** *Social science & medicine (1982)* 2010, **71**(6):1208-1217.
  - 10 24. Pu C, Tang GJ, Huang N, Chou YJ: **Predictive power of self-rated health for subsequent mortality risk during old age: analysis of data from a nationally representative survey of elderly adults in Taiwan.** *J Epidemiol* 2011, **21**(4):278-284.
  - 11 25. Martin LG, Zimmer Z, Hurng BS: **Trends in late-life disability in Taiwan, 1989-2007: the roles of education, environment, and technology.** *Popul Stud (Camb)* 2011, **65**(3):289-304.
  - 12 26. de Vries NM, Staal JB, van Ravensberg CD, Hobbelen JS, Olde Rikkert MG, Nijhuis-van der Sanden MW: **Outcome instruments to measure frailty: a systematic review.** *Ageing research reviews* 2011, **10**(1):104-114.
  - 13 27. Hsu HC, Chang WC: **Trajectories of frailty and related factors of the older people in Taiwan.** *Experimental aging research* 2015, **41**(1):104-114.
  - 14 28. Ho HE, Yeh CJ, Chu WM, Lee MC: **Midlife Body Mass Index Trajectory and Risk of Frailty 8 Years Later in Taiwan.** *The journal of nutrition, health & aging* 2019, **23**(9):849-855.
  - 15 29. Covinsky KE, Eng C, Lui LY, Sands LP, Yaffe K: **The last 2 years of life:**

- 1  
2  
3  
4  
5  
6  
7  
8  
9  
10  
11  
12  
13  
14  
15  
16  
17  
18  
19  
20  
21  
22  
23  
24  
25  
26  
27  
28  
29  
30  
31  
32  
33  
34  
35  
36  
37  
38  
39  
40  
41  
42  
43  
44  
45  
46  
47  
48  
49  
50  
51  
52  
53  
54  
55  
56  
57  
58  
59  
60
- 1        **functional trajectories of frail older people.** *Journal of the American Geriatrics Society* 2003, **51**(4):492-498.
- 2  
3        30. Nagin DS, Odgers CL: **Group-based trajectory modeling in clinical research.** *Annual review of clinical psychology* 2010, **6**:109-138.
- 4  
5        31. Dhana K, van Rosmalen J, Vistisen D, Ikram MA, Hofman A, Franco OH, Kavousi M: **Trajectories of body mass index before the diagnosis of cardiovascular disease: a latent class trajectory analysis.** *European journal of epidemiology* 2016, **31**(6):583-592.
- 6  
7        32. Murayama H, Liang J, Bennett JM, Shaw BA, Botoseneanu A, Kobayashi E, Fukaya T, Shinkai S: **Trajectories of Body Mass Index and Their Associations With Mortality Among Older Japanese: Do They Differ From Those of Western Populations?** *American journal of epidemiology* 2015, **182**(7):597-605.
- 8  
9        33. Gijzel SMW, van de Leemput IA, Scheffer M, Roppolo M, Olde Rikkert MGM, Melis RJF: **Dynamical Resilience Indicators in Time Series of Self-Rated Health Correspond to Frailty Levels in Older Adults.** *The journals of gerontology Series A, Biological sciences and medical sciences* 2017, **72**(7):991-996.
- 10  
11        34. Baddour NA, Robinson-Cohen C, Lipworth L, Bian A, Stewart TG, Jhamb M, Siew ED, Abdel-Kader K: **The Surprise Question and Self-Rated Health Are Useful Screens for Frailty and Disability in Older Adults with Chronic Kidney Disease.** *Journal of palliative medicine* 2019, **22**(12):1522-1529.
- 12  
13        35. Pinto JM, Fontaine AM, Neri AL: **The influence of physical and mental health on life satisfaction is mediated by self-rated health: A study with Brazilian elderly.** *Archives of gerontology and geriatrics* 2016, **65**:104-110.
- 14  
15        36. Lutgendorf SK, Costanzo ES: **Psychoneuroimmunology and health psychology: an integrative model.** *Brain, behavior, and immunity* 2003, **17**(4):225-232.
- 16  
17        37. Christian LM, Glaser R, Porter K, Malarkey WB, Beversdorf D, Kiecolt-Glaser JK: **Poorer self-rated health is associated with elevated inflammatory markers among older adults.** *Psychoneuroendocrinology* 2011, **36**(10):1495-1504.
- 18  
19        38. Granger E, Williams G, Di Nardo F, Harrison A, Verma A: **The relationship between physical activity and self-rated health status in European adolescents: Results of the EURO-URHIS 2 survey.** *European journal of public health* 2017, **27**(suppl\_2):107-111.
- 20  
21        39. Savela SL, Koistinen P, Stenholm S, Tilvis RS, Strandberg AY, Pitkala KH, Salomaa VV, Strandberg TE: **Leisure-time physical activity in midlife is related to old age frailty.** *The journals of gerontology Series A, Biological sciences and medical sciences* 2013, **68**(11):1433-1438.

## 1 TABLES

2

Table 1. Demographic and clinical characteristics of the participants grouped by SRH trajectories

| Characteristics      | Total<br>n=1956 | SRH Trajectory   |                   |                  |                  | P value  |
|----------------------|-----------------|------------------|-------------------|------------------|------------------|----------|
|                      |                 | Group 1<br>n=232 | Group 2<br>n=1123 | Group 3<br>n=335 | Group 4<br>n=266 |          |
| Age                  | 61.46(4.8)      | 62.42(4.5)       | 61.56(4.8)        | 60.75(4.8)       | 61.11(4.9)       | 0.0003*  |
| Sex                  |                 |                  |                   |                  |                  | <0.0001* |
| Male                 | 1025(52.4%)     | 104(44.8%)       | 547(48.7%)        | 210(62.7%)       | 164(61.65%)      |          |
| Female               | 931(47.6%)      | 128(55.2%)       | 576(51.3%)        | 125(37.3%)       | 102(38.35%)      |          |
| Level of education   |                 |                  |                   |                  |                  | <0.0001* |
| illiterate           | 473(24.18%)     | 82(35.3%)        | 301(26.8%)        | 41(12.2%)        | 49(18.4%)        |          |
| 1~6 yrs              | 987(50.46%)     | 120(51.7%)       | 573(51%)          | 164(49%)         | 130(48.9%)       |          |
| 7~12 yrs             | 374(19.12%)     | 26(11.2%)        | 191(17%)          | 93(27.8%)        | 64(24.1%)        |          |
| >12 yrs              | 122(6.24%)      | 4(1.7%)          | 58(5.2%)          | 37(11%)          | 23(8.7%)         |          |
| Income               |                 |                  |                   |                  |                  | <0.0001* |
| Poor                 | 416(21.81%)     | 76(33.9%)        | 246(22.5%)        | 43(13.1%)        | 51(19.8%)        |          |
| Fair                 | 860(45.1%)      | 102(45.5%)       | 513(46.8%)        | 143(43.5%)       | 102(39.5%)       |          |
| Good                 | 631(33.09%)     | 46(20.5%)        | 337(30.8%)        | 143(43.5%)       | 105(40.7%)       |          |
| Social participation |                 |                  |                   |                  |                  | 0.0003*  |
| No                   | 475(24.28%)     | 61(26.3%)        | 305(27.2%)        | 56(16.7%)        | 53(19.9%)        |          |
| Yes                  | 1481(75.72%)    | 171(73.7%)       | 818(72.8%)        | 279(83.3%)       | 213(80.1%)       |          |
| Marriage             |                 |                  |                   |                  |                  | 0.0316*  |
| No                   | 356(18.2%)      | 46(19.8%)        | 215(19.2%)        | 42(12.5%)        | 53(19.9%)        |          |

|                     |     |              |            |            |            |            |          |
|---------------------|-----|--------------|------------|------------|------------|------------|----------|
|                     | Yes | 1600(81.8%)  | 186(80.2%) | 908(80.9%) | 293(87.5%) | 213(80.1%) |          |
| Smoking             | No  | 1415(72.34%) | 173(74.6%) | 826(73.6%) | 240(71.6%) | 176(66.2%) | 0.0876*  |
|                     | Yes | 541(27.66%)  | 59(25.4%)  | 297(26.5%) | 95(28.4%)  | 90(33.8%)  |          |
| Alcohol consumption | No  | 1361(69.62%) | 181(78.4%) | 817(72.8%) | 204(60.9%) | 159(59.8%) | <0.0001* |
|                     | Yes | 594(30.38%)  | 50(21.7%)  | 306(27.3%) | 131(39.1%) | 107(40.2%) |          |
| Unemployment        | No  | 816(41.82%)  | 75(32.6%)  | 431(38.5%) | 178(53.1%) | 132(49.6%) | <0.0001* |
|                     | Yes | 1135(58.18%) | 155(67.4%) | 689(61.5%) | 157(46.9%) | 134(50.4%) |          |
| Number of diseases  |     | 1.21(1.29)   | 1.92(1.55) | 1.35(1.31) | 0.63(0.92) | 0.74(0.89) | <0.0001* |

Notes. Data in tables are numbers(%) for categorical variables and means (SD) for continuous variables. Group 1 refers to constant poor SRH group; Group 2 refers to constant fair SRH group; Group 3 refers to constant good SRH group; Group 4 refers to good to fair SRH group  
\* P<0.05

1  
2

Table 2. Univariate logistic regression of demographic and clinical characteristics predicting frailty

|                      |            | Frailty |             |         |
|----------------------|------------|---------|-------------|---------|
|                      |            | OR      | 95%CI       | P value |
| Age                  |            | 1.118*  | 1.077-1.161 | <.0001  |
| Sex                  |            |         |             |         |
|                      | Male       | Ref     |             | <.0001  |
|                      | Female     | 2.063*  | 1.441-2.954 |         |
| Level of education   |            |         |             |         |
|                      | illiterate | Ref     |             |         |
|                      | 1~6 years  | 0.556*  | 0.384-0.805 | 0.0019  |
|                      | 7~12 years | 0.240*  | 0.126-0.456 | <0.0001 |
|                      | >12 years  | 0.058*  | 0.008-0.424 | 0.005   |
| Income satisfaction  |            |         |             |         |
|                      | Good       | Ref     |             |         |
|                      | Fair       | 1.408   | 0.909-2.181 | 0.1259  |
|                      | Poor       | 2.324*  | 1.447-3.734 | 0.0005  |
| Social participation |            |         |             |         |
|                      | Yes        | 0.642*  | 0.443-0.931 | <0.0001 |
|                      | No         | Ref     |             |         |
| Marriage             |            |         |             |         |
|                      | Yes        | Ref     |             |         |
|                      | No         | 1.276   | 0.830-1.962 | 0.2665  |
| Smoking              |            |         |             |         |
|                      | Yes        | 0.7     | 0.458-1.069 | 0.0991  |

|                     |      |        |             |         |
|---------------------|------|--------|-------------|---------|
|                     | No   | Ref    |             |         |
| Alcohol consumption | Yes  | 0.566* | 0.371-0.863 | 0.0082  |
|                     | No   | Ref    |             |         |
| Unemployment        | Yes  | 2.889* | 1.914-4.359 | <0.0001 |
|                     | No   | Ref    |             |         |
| Self-Rated Health   | Good | 0.169* | 0.106-0.269 | <0.0001 |
|                     | Fair | 0.426  | 0.285-0.638 | <0.0001 |
|                     | Poor | Ref    |             |         |
| Number of diseases  |      | 1.407* | 1.248-1.587 | <.0001  |

\* P<0.05

1

Table 3. Multivariate logistic regression of SRH trajectories predicting frailty

|                      |            | Frailty |             |         |
|----------------------|------------|---------|-------------|---------|
|                      |            | OR      | 95%CI       | P value |
| Age                  |            | 1.104*  | 1.056-1.155 | <.0001  |
| Sex                  |            |         |             |         |
|                      | Male       | Ref     |             |         |
|                      | Female     | 1.291*  | 0.812-2.052 | 0.2803  |
| Level of education   |            |         |             |         |
|                      | illiterate | Ref     |             |         |
|                      | 1~6 years  | 0.791   | 0.517-1.211 | 0.2811  |
|                      | 7~12 years | 0.492   | 0.241-1.007 | 0.0523  |
|                      | >12 years  | 0.185   | 0.024-1.430 | 0.1058  |
| Income satisfaction  |            |         |             |         |
|                      | Good       | Ref     |             |         |
|                      | Fair       | 1.039   | 0.645-1.674 | 0.8746  |
|                      | Poor       | 1.731*  | 1.022-2.933 | 0.0413  |
| Social Participation |            |         |             |         |
|                      | Yes        | 1.295   | 0.829-2.024 | 0.2558  |
|                      | No         | Ref     |             |         |
| Alcohol consumption  |            |         |             |         |
|                      | Yes        | 1.055   | 0.632-1.761 | 0.8382  |
|                      | No         | Ref     |             |         |
| Unemployment         |            |         |             |         |
|                      | Yes        | 1.997*  | 1.221-3.267 | 0.0059  |

|                              | No      | Ref    |             |        |
|------------------------------|---------|--------|-------------|--------|
| Self Rated Health trajectory |         |        |             |        |
|                              | Group 1 | 3.091* | 2.036-4.692 | <.0001 |
|                              | Group 2 | Ref    |             |        |
|                              | Group 3 | 0.044* | 0.006-0.323 | 0.0021 |
|                              | Group 4 | 0.192* | 0.059-0.625 | 0.0061 |
| Number of diseases           |         | 1.103  | 0.961-1.267 | 0.1645 |

Notes. Group 1 refers to constant poor SRH group; Group 2 refers to constant fair SRH group; Group 3 refers to constant good SRH group; Group 4 refers to good to fair SRH group  
\* P<0.05



1  
2  
3  
4  
5  
6  
7  
8  
9  
10  
11  
12  
13  
14  
15  
16  
17  
18  
19  
20  
21  
22  
23  
24  
25  
26  
27  
28  
29  
30  
31  
32  
33  
34  
35  
36  
37  
38  
39  
40  
41  
42  
43  
44  
45  
46  
47  
48  
49  
50  
51  
52  
53  
54  
55  
56  
57  
58  
59  
60

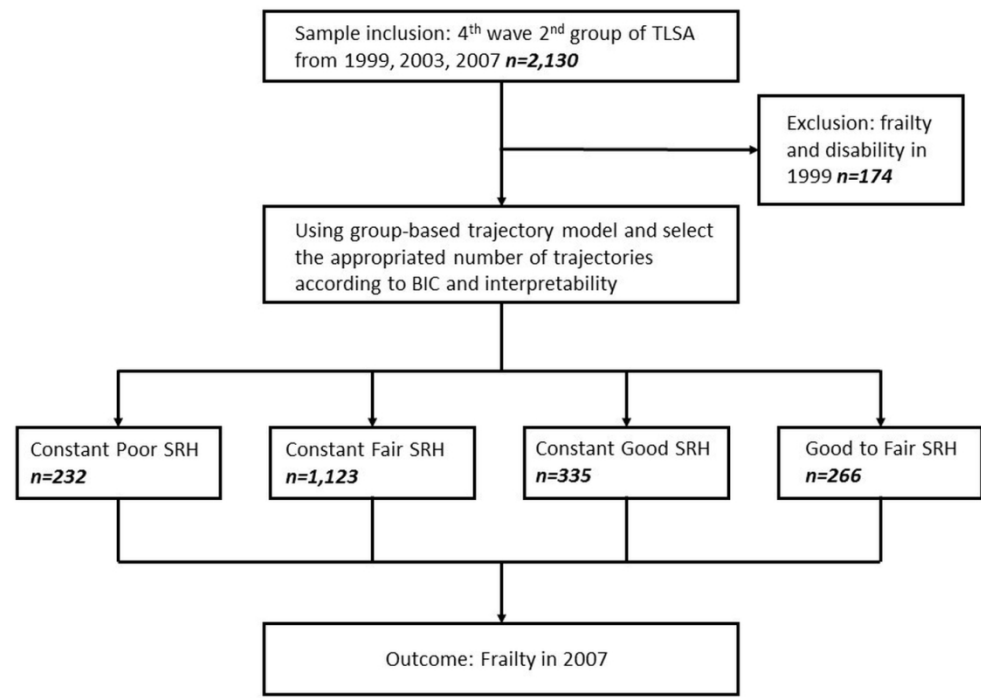

Figure 1. Flow chart of the study design

srh vs. year1999–2007

Cnorm Model

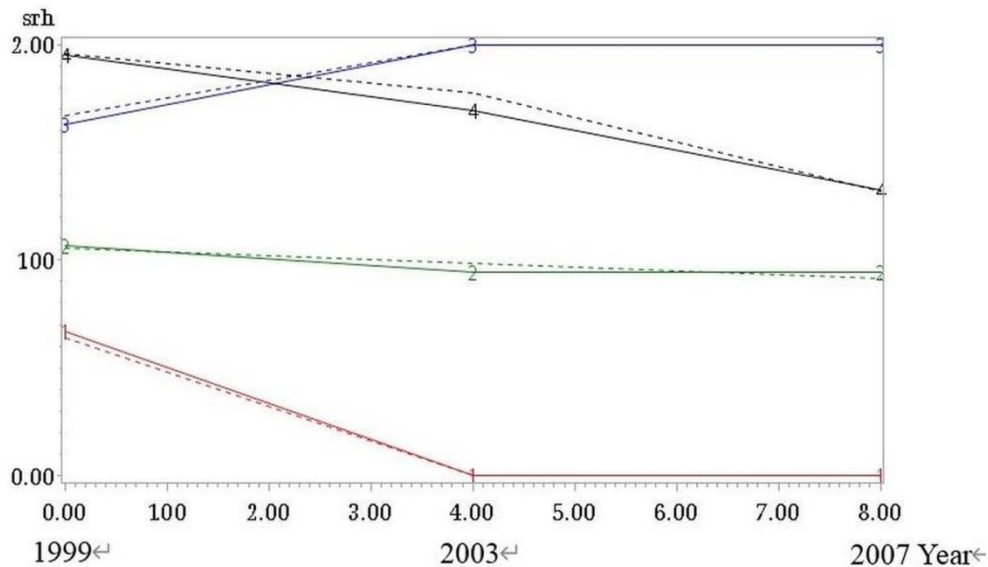

Figure 2. Trajectories of Self-Rated Health score between 1999 and 2007

# Reporting checklist for cohort study.

Based on the STROBE cohort guidelines.

## Instructions to authors

Complete this checklist by entering the page numbers from your manuscript where readers will find each of the items listed below.

Your article may not currently address all the items on the checklist. Please modify your text to include the missing information. If you are certain that an item does not apply, please write "n/a" and provide a short explanation.

Upload your completed checklist as an extra file when you submit to a journal.

In your methods section, say that you used the STROBE cohort reporting guidelines, and cite them as:

von Elm E, Altman DG, Egger M, Pocock SJ, Gøtzsche PC, Vandenbroucke JP. The Strengthening the Reporting of Observational Studies in Epidemiology (STROBE) Statement: guidelines for reporting observational studies.

|                           |                     | Reporting Item                                                                                  | Page Number |
|---------------------------|---------------------|-------------------------------------------------------------------------------------------------|-------------|
| <b>Title and abstract</b> |                     |                                                                                                 |             |
| Title                     | <a href="#">#1a</a> | Indicate the study's design with a commonly used term in the title or the abstract              | 1           |
| Abstract                  | <a href="#">#1b</a> | Provide in the abstract an informative and balanced summary of what was done and what was found | 3           |
| <b>Introduction</b>       |                     |                                                                                                 |             |
| Background / rationale    | <a href="#">#2</a>  | Explain the scientific background and rationale for the investigation being reported            | 5           |
| Objectives                | <a href="#">#3</a>  | State specific objectives, including any prespecified hypotheses                                | 6           |
| <b>Methods</b>            |                     |                                                                                                 |             |
| Study design              | <a href="#">#4</a>  | Present key elements of study design early in the paper                                         | 6           |
| Setting                   | <a href="#">#5</a>  | Describe the setting, locations, and relevant dates, including periods                          | 6           |

|    |                      |                                                                                                                                                                                                                                                                                         |     |
|----|----------------------|-----------------------------------------------------------------------------------------------------------------------------------------------------------------------------------------------------------------------------------------------------------------------------------------|-----|
|    |                      | of recruitment, exposure, follow-up, and data collection                                                                                                                                                                                                                                |     |
| 1  |                      |                                                                                                                                                                                                                                                                                         |     |
| 2  |                      |                                                                                                                                                                                                                                                                                         |     |
| 3  | Eligibility criteria | <a href="#">#6a</a> Give the eligibility criteria, and the sources and methods of selection of participants. Describe methods of follow-up.                                                                                                                                             | 7   |
| 4  |                      |                                                                                                                                                                                                                                                                                         |     |
| 5  |                      |                                                                                                                                                                                                                                                                                         |     |
| 6  | Eligibility criteria | <a href="#">#6b</a> For matched studies, give matching criteria and number of exposed and unexposed                                                                                                                                                                                     | n/a |
| 7  |                      |                                                                                                                                                                                                                                                                                         |     |
| 8  |                      |                                                                                                                                                                                                                                                                                         |     |
| 9  |                      |                                                                                                                                                                                                                                                                                         |     |
| 10 | Variables            | <a href="#">#7</a> Clearly define all outcomes, exposures, predictors, potential confounders, and effect modifiers. Give diagnostic criteria, if applicable                                                                                                                             | 7   |
| 11 |                      |                                                                                                                                                                                                                                                                                         |     |
| 12 |                      |                                                                                                                                                                                                                                                                                         |     |
| 13 |                      |                                                                                                                                                                                                                                                                                         |     |
| 14 |                      |                                                                                                                                                                                                                                                                                         |     |
| 15 | Data sources /       |                                                                                                                                                                                                                                                                                         |     |
| 16 | measurement          | <a href="#">#8</a> For each variable of interest give sources of data and details of methods of assessment (measurement). Describe comparability of assessment methods if there is more than one group. Give information separately for for exposed and unexposed groups if applicable. | 7   |
| 17 |                      |                                                                                                                                                                                                                                                                                         |     |
| 18 |                      |                                                                                                                                                                                                                                                                                         |     |
| 19 |                      |                                                                                                                                                                                                                                                                                         |     |
| 20 |                      |                                                                                                                                                                                                                                                                                         |     |
| 21 |                      |                                                                                                                                                                                                                                                                                         |     |
| 22 | Bias                 | <a href="#">#9</a> Describe any efforts to address potential sources of bias                                                                                                                                                                                                            | 7   |
| 23 |                      |                                                                                                                                                                                                                                                                                         |     |
| 24 | Study size           | <a href="#">#10</a> Explain how the study size was arrived at                                                                                                                                                                                                                           | 7   |
| 25 |                      |                                                                                                                                                                                                                                                                                         |     |
| 26 |                      |                                                                                                                                                                                                                                                                                         |     |
| 27 | Quantitative         |                                                                                                                                                                                                                                                                                         |     |
| 28 | variables            | <a href="#">#11</a> Explain how quantitative variables were handled in the analyses. If applicable, describe which groupings were chosen, and why                                                                                                                                       | 7   |
| 29 |                      |                                                                                                                                                                                                                                                                                         |     |
| 30 |                      |                                                                                                                                                                                                                                                                                         |     |
| 31 | Statistical          |                                                                                                                                                                                                                                                                                         |     |
| 32 | methods              | <a href="#">#12a</a> Describe all statistical methods, including those used to control for confounding                                                                                                                                                                                  |     |
| 33 |                      |                                                                                                                                                                                                                                                                                         |     |
| 34 | 8                    |                                                                                                                                                                                                                                                                                         |     |
| 35 |                      |                                                                                                                                                                                                                                                                                         |     |
| 36 |                      |                                                                                                                                                                                                                                                                                         |     |
| 37 | Statistical          | <a href="#">#12b</a> Describe any methods used to examine subgroups and interactions                                                                                                                                                                                                    | 8   |
| 38 | methods              |                                                                                                                                                                                                                                                                                         |     |
| 39 |                      |                                                                                                                                                                                                                                                                                         |     |
| 40 |                      |                                                                                                                                                                                                                                                                                         |     |
| 41 | Statistical          | <a href="#">#12c</a> Explain how missing data were addressed                                                                                                                                                                                                                            | 8   |
| 42 | methods              |                                                                                                                                                                                                                                                                                         |     |
| 43 |                      |                                                                                                                                                                                                                                                                                         |     |
| 44 | Statistical          | <a href="#">#12d</a> If applicable, explain how loss to follow-up was addressed                                                                                                                                                                                                         | 8   |
| 45 | methods              |                                                                                                                                                                                                                                                                                         |     |
| 46 |                      |                                                                                                                                                                                                                                                                                         |     |
| 47 |                      |                                                                                                                                                                                                                                                                                         |     |
| 48 | Statistical          | <a href="#">#12e</a> Describe any sensitivity analyses                                                                                                                                                                                                                                  |     |
| 49 | methods              |                                                                                                                                                                                                                                                                                         |     |
| 50 |                      |                                                                                                                                                                                                                                                                                         |     |
| 51 |                      |                                                                                                                                                                                                                                                                                         |     |
| 52 | 8                    |                                                                                                                                                                                                                                                                                         |     |
| 53 |                      |                                                                                                                                                                                                                                                                                         |     |
| 54 | <b>Results</b>       |                                                                                                                                                                                                                                                                                         |     |
| 55 |                      |                                                                                                                                                                                                                                                                                         |     |
| 56 |                      |                                                                                                                                                                                                                                                                                         |     |
| 57 | Participants         | <a href="#">#13a</a> Report numbers of individuals at each stage of study—eg numbers potentially eligible, examined for eligibility, confirmed eligible,                                                                                                                                | 9   |
| 58 |                      |                                                                                                                                                                                                                                                                                         |     |
| 59 |                      |                                                                                                                                                                                                                                                                                         |     |
| 60 |                      |                                                                                                                                                                                                                                                                                         |     |

included in the study, completing follow-up, and analysed. Give information separately for for exposed and unexposed groups if applicable.

|    |                  |                      |                                                                            |
|----|------------------|----------------------|----------------------------------------------------------------------------|
| 1  |                  |                      |                                                                            |
| 2  |                  |                      |                                                                            |
| 3  |                  |                      |                                                                            |
| 4  |                  |                      |                                                                            |
| 5  | Participants     | <a href="#">#13b</a> | Give reasons for non-participation at each stage 9                         |
| 6  |                  |                      |                                                                            |
| 7  | Participants     | <a href="#">#13c</a> | Consider use of a flow diagram                                             |
| 8  |                  |                      |                                                                            |
| 9  |                  |                      |                                                                            |
| 10 |                  |                      |                                                                            |
| 11 |                  |                      |                                                                            |
| 12 | Descriptive data | <a href="#">#14a</a> | Give characteristics of study participants (eg demographic, clinical, 9    |
| 13 |                  |                      | social) and information on exposures and potential confounders. Give       |
| 14 |                  |                      | information separately for exposed and unexposed groups if                 |
| 15 |                  |                      | applicable.                                                                |
| 16 |                  |                      |                                                                            |
| 17 |                  |                      |                                                                            |
| 18 |                  |                      |                                                                            |
| 19 | Descriptive data | <a href="#">#14b</a> | Indicate number of participants with missing data for each variable of     |
| 20 |                  |                      | interest                                                                   |
| 21 |                  |                      |                                                                            |
| 22 |                  |                      |                                                                            |
| 23 | n/a              |                      |                                                                            |
| 24 |                  |                      |                                                                            |
| 25 | Descriptive data | <a href="#">#14c</a> | Summarise follow-up time (eg, average and total amount)                    |
| 26 |                  |                      |                                                                            |
| 27 |                  |                      |                                                                            |
| 28 |                  |                      |                                                                            |
| 29 |                  |                      |                                                                            |
| 30 | Outcome data     | <a href="#">#15</a>  | Report numbers of outcome events or summary measures over time.            |
| 31 |                  |                      | Give information separately for exposed and unexposed groups if            |
| 32 |                  |                      | applicable.                                                                |
| 33 |                  |                      |                                                                            |
| 34 |                  |                      |                                                                            |
| 35 |                  |                      |                                                                            |
| 36 |                  |                      |                                                                            |
| 37 |                  |                      |                                                                            |
| 38 | Main results     | <a href="#">#16a</a> | Give unadjusted estimates and, if applicable, confounder-adjusted 9        |
| 39 |                  |                      | estimates and their precision (eg, 95% confidence interval). Make          |
| 40 |                  |                      | clear which confounders were adjusted for and why they were                |
| 41 |                  |                      | included                                                                   |
| 42 |                  |                      |                                                                            |
| 43 |                  |                      |                                                                            |
| 44 | Main results     | <a href="#">#16b</a> | Report category boundaries when continuous variables were 9                |
| 45 |                  |                      | categorized                                                                |
| 46 |                  |                      |                                                                            |
| 47 |                  |                      |                                                                            |
| 48 | Main results     | <a href="#">#16c</a> | If relevant, consider translating estimates of relative risk into absolute |
| 49 |                  |                      | risk for a meaningful time period                                          |
| 50 |                  |                      |                                                                            |
| 51 |                  |                      |                                                                            |
| 52 | n/a              |                      |                                                                            |
| 53 |                  |                      |                                                                            |
| 54 | Other analyses   | <a href="#">#17</a>  | Report other analyses done—eg analyses of subgroups and 9                  |
| 55 |                  |                      | interactions, and sensitivity analyses                                     |
| 56 |                  |                      |                                                                            |
| 57 |                  |                      |                                                                            |

## Discussion

|    |                    |                     |                                                                          |    |
|----|--------------------|---------------------|--------------------------------------------------------------------------|----|
| 1  | Key results        | <a href="#">#18</a> | Summarise key results with reference to study objectives                 | 11 |
| 2  |                    |                     |                                                                          |    |
| 3  | Limitations        | <a href="#">#19</a> | Discuss limitations of the study, taking into account sources of         | 13 |
| 4  |                    |                     | potential bias or imprecision. Discuss both direction and magnitude of   |    |
| 5  |                    |                     | any potential bias.                                                      |    |
| 6  |                    |                     |                                                                          |    |
| 7  |                    |                     |                                                                          |    |
| 8  | Interpretation     | <a href="#">#20</a> | Give a cautious overall interpretation considering objectives,           | 13 |
| 9  |                    |                     | limitations, multiplicity of analyses, results from similar studies, and |    |
| 10 |                    |                     | other relevant evidence.                                                 |    |
| 11 |                    |                     |                                                                          |    |
| 12 |                    |                     |                                                                          |    |
| 13 |                    |                     |                                                                          |    |
| 14 | Generalisability   | <a href="#">#21</a> | Discuss the generalisability (external validity) of the study results    | 14 |
| 15 |                    |                     |                                                                          |    |
| 16 | <b>Other</b>       |                     |                                                                          |    |
| 17 | <b>Information</b> |                     |                                                                          |    |
| 18 |                    |                     |                                                                          |    |
| 19 |                    |                     |                                                                          |    |
| 20 | Funding            | <a href="#">#22</a> | Give the source of funding and the role of the funders for the present   | 16 |
| 21 |                    |                     | study and, if applicable, for the original study on which the present    |    |
| 22 |                    |                     | article is based                                                         |    |
| 23 |                    |                     |                                                                          |    |
| 24 |                    |                     |                                                                          |    |

25 The STROBE checklist is distributed under the terms of the Creative Commons Attribution License CC-BY.  
 26 This checklist was completed on 01. February 2021 using <https://www.goodreports.org/>, a tool made by the  
 27 EQUATOR Network in collaboration with [Penelope.ai](#)  
 28  
 29  
 30  
 31  
 32  
 33  
 34  
 35  
 36  
 37  
 38  
 39  
 40  
 41  
 42  
 43  
 44  
 45  
 46  
 47  
 48  
 49  
 50  
 51  
 52  
 53  
 54  
 55  
 56  
 57  
 58  
 59  
 60

# BMJ Open

## Trajectory of self-rated health on the incidence of frailty among community-dwelling older adults: evidence from the Taiwan Longitudinal Study on Aging (TLSA)

|                                 |                                                                                                                                                                                                                                                                                                                                                                                                                                                                                                                                                                                                                                                                                                                                                                              |
|---------------------------------|------------------------------------------------------------------------------------------------------------------------------------------------------------------------------------------------------------------------------------------------------------------------------------------------------------------------------------------------------------------------------------------------------------------------------------------------------------------------------------------------------------------------------------------------------------------------------------------------------------------------------------------------------------------------------------------------------------------------------------------------------------------------------|
| Journal:                        | <i>BMJ Open</i>                                                                                                                                                                                                                                                                                                                                                                                                                                                                                                                                                                                                                                                                                                                                                              |
| Manuscript ID                   | bmjopen-2021-049795.R1                                                                                                                                                                                                                                                                                                                                                                                                                                                                                                                                                                                                                                                                                                                                                       |
| Article Type:                   | Original research                                                                                                                                                                                                                                                                                                                                                                                                                                                                                                                                                                                                                                                                                                                                                            |
| Date Submitted by the Author:   | 20-May-2021                                                                                                                                                                                                                                                                                                                                                                                                                                                                                                                                                                                                                                                                                                                                                                  |
| Complete List of Authors:       | Chu, Wei-Min ; Taichung Veterans General Hospital, Department of Family Medicine; National Yang-Ming University, School of Medicine Ho, Hsin-En; Taichung Armed Forces General Hospital, Department of Family medicine; Chung Shan Medical University, Institution of Medicine Yeh, Chih-Jung; Chung Shan Medical University, School of Public Health Hsiao, Yu-han; Taichung Hospital, Department of Family Medicine; Chung Shan Medical University, School of Public Health Hsu, Pi-Shan; Taichung Veterans General Hospital, Department of Family Medicine<br>Lee, Shu-Hsin; Chung Shan Medical University, School of Nursing<br>Lee, Meng-Chih ; Taichung Hospital, Department of Family Medicine; National Health Research Institutes, Institute of Population Sciences |
| <b>Primary Subject Heading</b>: | Geriatric medicine                                                                                                                                                                                                                                                                                                                                                                                                                                                                                                                                                                                                                                                                                                                                                           |
| Secondary Subject Heading:      | Epidemiology, Public health                                                                                                                                                                                                                                                                                                                                                                                                                                                                                                                                                                                                                                                                                                                                                  |
| Keywords:                       | GERIATRIC MEDICINE, PUBLIC HEALTH, EPIDEMIOLOGY                                                                                                                                                                                                                                                                                                                                                                                                                                                                                                                                                                                                                                                                                                                              |
|                                 |                                                                                                                                                                                                                                                                                                                                                                                                                                                                                                                                                                                                                                                                                                                                                                              |

SCHOLARONE™  
Manuscripts

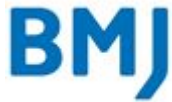

I, the Submitting Author has the right to grant and does grant on behalf of all authors of the Work (as defined in the below author licence), an exclusive licence and/or a non-exclusive licence for contributions from authors who are: i) UK Crown employees; ii) where BMJ has agreed a CC-BY licence shall apply, and/or iii) in accordance with the terms applicable for US Federal Government officers or employees acting as part of their official duties; on a worldwide, perpetual, irrevocable, royalty-free basis to BMJ Publishing Group Ltd ("BMJ") its licensees and where the relevant Journal is co-owned by BMJ to the co-owners of the Journal, to publish the Work in this journal and any other BMJ products and to exploit all rights, as set out in our [licence](#).

The Submitting Author accepts and understands that any supply made under these terms is made by BMJ to the Submitting Author unless you are acting as an employee on behalf of your employer or a postgraduate student of an affiliated institution which is paying any applicable article publishing charge ("APC") for Open Access articles. Where the Submitting Author wishes to make the Work available on an Open Access basis (and intends to pay the relevant APC), the terms of reuse of such Open Access shall be governed by a Creative Commons licence – details of these licences and which [Creative Commons](#) licence will apply to this Work are set out in our licence referred to above.

Other than as permitted in any relevant BMJ Author's Self Archiving Policies, I confirm this Work has not been accepted for publication elsewhere, is not being considered for publication elsewhere and does not duplicate material already published. I confirm all authors consent to publication of this Work and authorise the granting of this licence.



1  
2  
3 1 **TITLE**  
4

5 2 Trajectory of self-rated health on the incidence of frailty among community-dwelling  
6  
7 3 older adults: evidence from the Taiwan Longitudinal Study on Aging (TLSA)  
8  
9

10 4  
11  
12 5 **AUTHOR and AFFLIATION**  
13

14 6 Wei-Min Chu<sup>1,2,3</sup>, Hsin-En Ho<sup>4,5,6</sup>, Chih-Jung Yeh<sup>7</sup>, Yu-han Hsiao<sup>7,8</sup>, Pi-Shan Hsu<sup>1</sup>,  
15  
16 7 Shu-Hsin Lee<sup>9,10</sup>, Meng-Chih Lee<sup>8,11</sup>  
17  
18

19 8 <sup>1</sup>Department of Family Medicine, Taichung Veterans General Hospital, Taichung,  
20  
21 9 Taiwan  
22

23  
24 10 <sup>2</sup>School of Medicine, Chung Shan Medical University, Taichung, Taiwan  
25

26 11 <sup>3</sup>School of Medicine, National Yang-Ming University, Taipei, Taiwan  
27

28  
29 12 <sup>4</sup>Department of Family medicine, Taichung Armed Force General Hospital, Taichung,  
30  
31 13 Taiwan.  
32  
33

34 14 <sup>5</sup>Institute of Medicine, Chung Shan Medical University, Taichung, Taiwan  
35

36 15 <sup>6</sup>National Defense Medical Center, Taipei, Taiwan  
37

38  
39 16 <sup>7</sup>School of Public Health, Chung Shan Medical University, Taichung, Taiwan  
40

41 17 <sup>8</sup>Department of Family Medicine, Taichung Hospital, Ministry of Health and Welfare,  
42  
43 18 Taichung, Taiwan  
44

45 19 <sup>9</sup>School of Nursing, Chung Shan Medical University, Taichung, Taiwan  
46

47  
48 20 <sup>10</sup>Center for Education and Research on Geriatrics and Gerontology, Chung Shan  
49  
50 21 Medical University, Taichung, Taiwan  
51

52  
53 22 <sup>11</sup>Institute of Population Sciences, National Health Research Institutes, Miaoli County,  
54  
55 23 Taiwan  
56

57 24  
58  
59  
60 25

1  
2  
3  
4 **1 Corresponding author:**  
5

6  
7 **2 Meng-Chih Lee, M.D., Ph.D., MPH**  
8  
9

10 **3**  
11

12  
13 **4 Department of Family Medicine**  
14

15  
16 **5 Taichung Hospital, Ministry of Health and Welfare**  
17

18  
19 **6 Taichung, Taiwan**  
20

21  
22 **7 Postal Address: No. 199, Sec. 1, Sanmin Rd., West Dist., Taichung City 403,**  
23

24  
25 **8 Taiwan (R.O.C.)**  
26

27  
28 **9 Phone: 04-22294411**  
29

30  
31 **10 mengchihlee@gmail.com**  
32

33  
34 **11**  
35

36  
37 **12 Word counts: 2995**  
38

39  
40 **13**  
41  
42  
43  
44  
45  
46  
47  
48  
49  
50  
51  
52  
53  
54  
55  
56  
57  
58  
59  
60

1  
2  
3 **1 ABSTRACT**  
4  
5

6 **2 Objectives:** Self-rated health (SRH) is an assessment and predictor of health based on  
7  
8  
9  
10  
11  
12  
13  
14  
15  
16  
17  
18  
19  
20  
21  
22  
23  
24  
25  
26  
27  
28  
29  
30  
31  
32  
33  
34  
35  
36  
37  
38  
39  
40  
41  
42  
43  
44  
45  
46  
47  
48  
49  
50  
51  
52  
53  
54  
55  
56  
57  
58  
59  
60  
an individual's general condition, however evidence of the value of SRH for  
predicting frailty remains scarce for older Asian adults. This study aimed to evaluate  
the relationship between self-rated health (SRH) score trajectory and frailty among  
older individuals in Taiwan.

7 **Design:** An 8-year retrospective cohort study.

8 **Setting:** Data were retrieved from the Taiwan Longitudinal Study on Aging between  
9  
10  
11  
12  
13  
14  
15  
16  
17  
18  
19  
20  
21  
22  
23  
24  
25  
26  
27  
28  
29  
30  
31  
32  
33  
34  
35  
36  
37  
38  
39  
40  
41  
42  
43  
44  
45  
46  
47  
48  
49  
50  
51  
52  
53  
54  
55  
56  
57  
58  
59  
60  
1999 to 2007.

10 **Participants:** Respondents aged 53 to 69-years-old who were not frail or disabled in  
11  
12  
13  
14  
15  
16  
17  
18  
19  
20  
21  
22  
23  
24  
25  
26  
27  
28  
29  
30  
31  
32  
33  
34  
35  
36  
37  
38  
39  
40  
41  
42  
43  
44  
45  
46  
47  
48  
49  
50  
51  
52  
53  
54  
55  
56  
57  
58  
59  
60  
1999 ( $n=1956$ ).

12 **Primary and Secondary Outcome Measures:** Frailty was defined using the Fried  
13  
14  
15  
16  
17  
18  
19  
20  
21  
22  
23  
24  
25  
26  
27  
28  
29  
30  
31  
32  
33  
34  
35  
36  
37  
38  
39  
40  
41  
42  
43  
44  
45  
46  
47  
48  
49  
50  
51  
52  
53  
54  
55  
56  
57  
58  
59  
60  
criteria. The group-based trajectory modelling (GBTM) technique was used to  
estimate SRH trajectories. Logistic regression analysis was used to examine the  
associations between changes in SRH and frailty.

16 **Results:** Four SRH trajectory classes were identified across the 8-year follow-up: 232  
17  
18  
19  
20  
21  
22  
23  
24  
25  
26  
27  
28  
29  
30  
31  
32  
33  
34  
35  
36  
37  
38  
39  
40  
41  
42  
43  
44  
45  
46  
47  
48  
49  
50  
51  
52  
53  
54  
55  
56  
57  
58  
59  
60  
participants (11.9%) were classified into the constantly poor SRH group, 1123  
(57.4%) into the constantly fair SRH group, 335 (17.1%) into the constantly good  
SRH group, and 266 (13.4%) into the good-to-fair SRH group. After adjusting for

1  
2  
3  
4 1 gender, age, level of education, income, social participation, health behaviors and  
5  
6  
7 2 major comorbidities, age, poor income satisfaction, unemployment and constantly  
8  
9  
10 3 poor SRH were associated with increased risk of frailty, while constantly good SRH  
11  
12  
13 4 [OR 0.044, 95% CI (0.006-0.323)] and good-to-fair SRH [OR 0.192, 95% CI  
14  
15  
16 5 (0.059-0.625)] were associated with reduced risks of frailty.

17  
18  
19 6 **Conclusions:** Constantly poor SRH is associated with an increased risk of frailty in  
20  
21  
22 7 older age. SRH in older adults should be recognized as a predictive tool for future  
23  
24  
25 8 frailty. Diet and exercise interventions may help to prevent frailty among high-risk  
26  
27  
28 9 older individuals with constantly low SRH.

30  
31 10

32  
33  
34 11 **Strengths and Limitation of study:**

35  
36  
37 12 1. To the best of our knowledge, this is the first long-term study to investigate the  
38  
39  
40 13 relationship between SRH trajectory and frailty among Asian population based on  
41  
42  
43 14 a nationally representative sample.

44  
45  
46 15 2. Reporting bias could happen because all data were collected through  
47  
48  
49 16 self-reporting and not measured objectively.

50  
51  
52 17 3. Frailty was defined according to a modified phenotype definition, assessed by  
53  
54  
55 18 using questionnaire data.

56  
57  
58 19

1  
2  
3 1 **Key words:** self-rated health, frailty, trajectory, older adults  
4  
5  
6  
7  
8  
9  
10  
11  
12  
13  
14  
15  
16  
17  
18  
19  
20  
21  
22  
23  
24  
25  
26  
27  
28  
29  
30  
31  
32  
33  
34  
35  
36  
37  
38  
39  
40  
41  
42  
43  
44  
45  
46  
47  
48  
49  
50  
51  
52  
53  
54  
55  
56  
57  
58  
59  
60

For peer review only

## 1 BACKGROUND

2 Aging has become a serious challenge globally in both Western and developed Asian  
3 countries. The World Health Organization define an aged society as a population in  
4 which people over 65-years-old comprise more than 14% of the total population.

5 According to the Department of Health of Taiwan, the proportion of people over 65 in  
6 Taiwan increased from 8.6% to 10.7% between 2000 and 2010 [1]. The Department  
7 of Development predict this number will rise to 20% by 2027 [2], which would  
8 represent the fastest rate of aging in the world. Due to the rapidly aging population,  
9 the annual crude mortality rate for Taiwanese citizens over 65 increased from 46.9%  
10 to 68.5% between 1981 to 2010 [1, 3].

11 Many key indicators can be used to predict the future health of the older adults,  
12 including the self-rated health (SRH) score. SRH refers to a single question such as  
13 “in general, would you say that your health is excellent, very good, good, fair, or  
14 poor?” [4]. SRH is an assessment and predictor of health based on an individual’s  
15 general condition and subjective feelings of their physical, psychological and social  
16 wellbeing, combined with objective measurements of health. Several studies have  
17 demonstrated consistency between SRH and individual health status and shown SRH  
18 can predict future mortality, disability and other adverse health outcomes [5-12].

19 Frailty has been proven to be one of the most important key indicators of the health of

1  
2  
3  
4 1 the elderly in recent decades. Frailty is a geriatric condition characterized by  
5  
6  
7 2 increased vulnerability and decreased capacity to maintain homeostasis, and  
8  
9  
10 3 pre-frailty refers to when one or two of the elements of the Fried frailty phenotype are  
11  
12  
13 4 detected [13]. Frailty in later life has been proven to lead to a number of adverse  
14  
15  
16 5 health outcomes and a poor quality of life [14-18]. As frailty can be addressed by  
17  
18  
19 6 proper recognition and treatment, such as diet and exercise, it is important to identify  
20  
21  
22 7 risk factors for frailty in older adults [19]. Several studies have explored the  
23  
24  
25 8 relationship between SRH and frailty[20-22]. A population-based study of more than  
26  
27  
28 9 2,000 healthy participants conducted in Finland by Huohvanainen et al. (2016) found  
29  
30  
31 10 that SRH in midlife could predict frailty, prefrailty and mortality in later life [23].  
32  
33  
34 11 However, most of previous studies were implemented in Western countries, evidence  
35  
36  
37 12 of the value of SRH for predicting frailty remains scarce for older Asian adults,  
38  
39  
40 13 especially from long-term observation. Also, more and more researchers used  
41  
42  
43 14 trajectories of SRH as indicators to explore the change of SRH through time and its  
44  
45  
46 15 consequences [24, 25]. The aim of this study was to explore the long-term  
47  
48  
49 16 relationships between SRH trajectories and future frailty in older Taiwanese adults  
50  
51  
52 17 using a national population cohort study.  
53  
54  
55  
56  
57

## 58 19 **METHODS**

### 1 *Data sources*

2 We retrieved data from the Taiwan Longitudinal Study in Aging (TLSA), a  
3 population-based, national representative study initiated by the Bureau of Health  
4 Promotion of Taiwan, and the Population Studies Center and the Institute of  
5 Gerontology at the University of Michigan in the United States. Data are collected  
6 from systematically selected representative samples of the Taiwanese population,  
7 including institutionalized older people. In TLSA, a three-stage systematic random  
8 sampling design was used for the selection of an equal probability sample [26]. We  
9 believe that TLSA hold high sample representative and revealed true population  
10 structure under this kind of sampling method. Personal interviews are conducted by  
11 highly trained interviewers. To ensure high data quality collection, careful supervision  
12 is provided during data collection and data processing is conducted by a professional  
13 data entry company.

14 The TLSA was started in 1989 and six waves of data collection had been completed  
15 by 2007. For this study, we used the 1999 sample, which included 2,130 subjects aged  
16 53–69-years-old in 1999. We followed-up this cohort for 8 years and used data from  
17 2007 to analyze outcomes. The Population Studies Center at the University of  
18 Michigan reviewed the representativeness of the completed sample; the analysis  
19 showed that the sample was highly representative, with a 90.6% response rate. Details  
20 of the study design have been described elsewhere [27-29].

### 21 *Study group identification*

22 We included the 1999 sample, which included 2,130 subjects aged 53–69-years-old in  
23 1999. Individuals who had developed frailty in 1999 or who had any functional  
24 disability in 1999 were excluded from the study. Functional disability was ascertained  
25



1 if participants had trouble with at least one activity of daily living, including bathing,  
2 dressing, eating, getting out of bed, walking, and using the bathroom [30]. Thus,  
3 1,956 subjects were included in the final analysis.

#### 4 5 *Research variables*

##### 6 *Demographics*

7 For each eligible subject, we gathered data in 1999 on age, gender, level of education,  
8 marital status, income level, social participation, employment status, smoking, alcohol  
9 consumption, and chronic diseases. We gathered data of SRH in 1999, 2003 and  
10 2007. Level of education was classified into four groups: illiterate (0 years),  
11 elementary school (1–6 years), junior to senior high school (7–12 years), and college  
12 or above (> 12 years). Income level was determined by asking individuals how they  
13 felt about their income level. The possible answers were *very satisfied*, *satisfied*, *fair*,  
14 *unsatisfied*, and *very unsatisfied*. We classified the income levels as “good ” (rated  
15 *very satisfied*, *satisfied*) “fair” (rated *fair*) or “poor” (*unsatisfied* or *very unsatisfied*).

##### 16 *Health factors*

17 SRH was determined by asking individuals how they rated their current health.  
18 Possible answers were *excellent*, *good*, *fair*, *poor*, and *very poor*. We reclassified the  
19 individuals into three groups based on SRH: good (rated *excellent* or *good*), fair (*fair*),  
20 or poor (*poor* or *very poor*). Individuals who had either paid or voluntary work or who  
21 participated in community activities were considered as having social participation.  
22 The individuals were classified into two groups based on employment status in 1999:  
23 normally employed and unemployed [31]. “Normally employed” was referred to as  
24 participants chose the answer of “ I had a job whether it was fulltime or par time job”  
25 or “I had a job but took a leave temporarily.”; “Unemployed” was referred to as

1 participants chose the answer of “I had no job and was looking for a job.” or “I did  
2 not doing any job.” The number of chronic diseases suffered by each individual was  
3 recorded, including hypertension, diabetes, cardiovascular disease, stroke, cancer,  
4 chronic respiratory diseases, arthritis or rheumatoid diseases, gastric diseases,  
5 hepatobiliary diseases, and kidney diseases. Information about chronic conditions was  
6 ascertained by a positive answer to the question “have you ever been told by a doctor  
7 that you suffer from...”.

### 8 *Outcome*

9 Data regarding frailty was collected in 2007 as the outcome measure. Frailty was  
10 defined according to the Fried criteria [13]. Individuals who exhibited at least three of  
11 five traits (i.e., weight loss, exhaustion, low physical activity, slowness and weakness)  
12 were considered frail. Individuals with only one or two of the five traits of Fried  
13 frailty criteria were regarded as pre-frail. We used substitute evaluations for these five  
14 domains because we retrieved data from questionnaires, and this modified frailty  
15 definition have been used broadly and published before with validity [32-34]. The  
16 parameter decreased appetite was used instead of body weight loss to represent  
17 nutritional status. Participants who reported poor appetite often in the previous week  
18 were classified as having the trait of shrinking. For mobility, we used walking/moving  
19 in and around the house instead of gait speed. Participants who had difficulty or were  
20 unable to walk a distance of 200 to 300 m were considered slow. For strength, we  
21 used the parameter of lifting heavy groceries instead of hand grip strength.  
22 Participants who had difficulty or were unable to carry 12 kg of groceries were  
23 considered weak. For physical activity, we used the duration of leisure time/physical  
24 activities per week instead of the level of physical activity. Participants who did not  
25 take a walk, hike or jog, do gardening, or participate in other outdoor activities at least

1  
2  
3 1 once or twice a week were considered to have low activity. We used the questionnaire  
4  
5 2 of the Center for Epidemiologic Studies Depression Scale (CES-D) to determine the  
6  
7 3 level of energy. Participants who reported, “*I could not get going*” or “*I felt everything*  
8  
9 4 *I did was an effort*” often or most of the time in the previous week were considered  
10  
11  
12 5 exhausted. Due to nearly all elderly approaching end-of-life have functional disability  
13  
14 6 and frailty, we regarded those who deceased during study period as having frailty in  
15  
16 7 our study [35]

18  
19 8

### 21 9 *Statistical analysis*

23  
24  
25  
26 10 A group-based trajectory modelling (GBTM) was applied to determine the SRH  
27  
28 11 trajectories. GBTM is a finite mixture model and also a semi-parametric model for  
29  
30 12 longitudinal data. We chose this model because it postulates discrete distribution of  
31  
32 13 the population and thus makes it possible to distinguish, in the population,  
33  
34 14 groups/classes of homogeneous individuals [36]. We used the three groups based on  
35  
36 15 SRH: good (rated *excellent* or *good*), fair (*fair*), or poor (*poor* or *very poor*) as  
37  
38 16 indicators to generate the model and employed the Bayesian Information Criterion to  
39  
40 17 identify the most appropriate model groups[37]. Previous geriatric research studies  
41  
42 18 have used this model [27, 33, 34, 38, 39]. For the descriptive analysis, we used  
43  
44 19 analysis of variance and the chi-square test to compare continuous and categorized  
45  
46 20 variables, respectively. Logistic regression was used to analyze the relationship  
47  
48 21 between SRH trajectories and frailty, with adjustments for age, gender, level of  
49  
50  
51  
52  
53  
54  
55  
56  
57  
58  
59  
60

1  
2  
3  
4 1 education, income level, marital status, number of chronic diseases, social  
5  
6  
7 2 participation, smoking, alcohol consumption, and employment status. Statistical  
8  
9  
10 3 significance was set at  $p < 0.05$ . All data were analyzed using SPSS (version 22.0,  
11  
12  
13 4 IBM, Chicago, IL, USA).

#### 15 16 5 *Patient and Public Involvement*

17  
18  
19  
20  
21 6 Patients or the public were not involved in the design, or conduct, or reporting of our  
22  
23  
24 7 research. However, Taiwan Association of Gerontology and Geriatrics, who listens to  
25  
26  
27 8 and stands for geriatric patients, will help with dissemination plans of our research  
28  
29  
30 9 results.  
31  
32  
33  
34 10

## 35 36 37 38 11 **RESULTS**

39  
40  
41 12 Figure 1 shows the flow chart of this study, including data collection from 1999, 2003  
42  
43  
44 13 and 2007. Table 1 shows the descriptive data for all subjects. A total of 1,956 subjects  
45  
46  
47 14 with an average age of 61.46 years were included the final analysis. Most subjects had  
48  
49  
50 15 1-6 years of education, had a fair income level, and were married. The average  
51  
52  
53 16 number of chronic diseases was 1.21. After GBTM was applied, 4 trajectories of SRH  
54  
55  
56 17 was generated from 1999 to 2007 (Figure 2). There were 232 participants (11.9%) in  
57  
58  
59 18 the constantly poor SRH group, 1123 participants (57.4%) in the constantly fair SRH  
60

1 group, 335 participants (17.1%) in the constantly good SRH group, and 266  
2 participants (13.6%) in the good-to-fair SRH group. Age distribution, sex, level of  
3 education, income level, social participation, marriage status, alcohol consumption,  
4 and unemployment status were significantly different between each of the four SRH  
5 trajectory classes.

6 Univariate logistic regression of the associations between the demographic and  
7 clinical characteristics and frailty are presented in Table 2. All variables, except for  
8 marital status and smoking behavior, were significantly associated with frailty.

9 Table 3 illustrates multivariate logistic regression regarding the relationship between  
10 SRH trajectories and frailty. After adjustments for relevant factors, including age,  
11 gender, level of education, income level, social participation, alcohol consumption  
12 behavior, number of chronic diseases, and unemployment status, logistic regression  
13 analysis revealed age, poor income satisfaction, unemployment and constantly poor  
14 SRH was associated with an increased risk of frailty [OR 3.091, 95% CI  
15 (2.036-4.692) for constantly poor SRH], while constantly good SRH [OR 0.044, 95%  
16 CI (0.006-0.323)] and good-to-fair SRH [OR 0.192, 95% CI (0.059-0.625)] were  
17 associated with a decreased risk of frailty compared to constantly fair SRH.

## 1 DISCUSSION

2 In this population cohort study, we created a trajectory-based model for 1,956  
3 Taiwanese adults aged 53–69-years-old in 1999. Based on their SRH trajectories over  
4 the 8-year follow-up, the cohort could be classified into four groups: constantly poor  
5 SRH, constantly fair SRH, constantly good SRH, and good-to fair SRH. Multivariate  
6 logistic regression demonstrated an elevated risk of frailty for the constantly poor  
7 SRH group. We also observed significant protective effects for the groups with  
8 constantly good SRH and good-to-fair SRH.

9 To the best of our knowledge, this is the first long-term study to investigate the  
10 relationship between SRH trajectory and frailty. Our results are consistent with  
11 previous studies which investigated SRH at single time point. Huohvanainen et al.  
12 (2016) found that poor SRH in midlife was associated with prefrailty, frailty and  
13 mortality in later life after 26 years of follow-up in Finland [23]. A short-term study  
14 of 22 institutionalized older individuals by Gijzel et al. (2017) found that variance in  
15 the SRH score time series was significantly higher in frail participants across physical,  
16 mental and social domains [40]. Baddour et al. (2019) reported that SRH correlated  
17 moderately with frailty and found that good-to-excellent SRH was predictive of  
18 non-frail status and preservation of activities of daily living (ADL) [41].

19 We believe this study provides strong evidence of a causal relationship between SRH  
20 and frailty. First, this study was a well-designed cohort study with nationally  
21 representative subjects and we excluded those who had disability and frailty at  
22 baseline. Second, a significantly elevated risk of frailty was observed in the poor SRH  
23 group, even after adjusting for confounding factors related to frailty, including age,  
24 gender, level of education, income level, marital status, major disease, health  
25 behaviors, social participation, and employment status in multivariate regression

1 analysis. Third, in analysis of the relationship between SRH trajectory and frailty, the  
2 constantly poor SRH group had an elevated risk of frailty, and significant protective  
3 effects were observed for the constantly good SRH and good-to-fair SRH groups.  
4 Thus, a causal relationship may exist between SRH and frailty.  
5 However, some studies stated that the relationship between SRH and frailty may be in  
6 different direction. Pinto et al. discovered that self-rated health is a mediator variable  
7 between physical and mental health, including frailty with life satisfaction [42]. The  
8 reasons could be that low level of daily activities prevent older adults from  
9 participating community activities, thus lead to poor subjective health and life  
10 satisfaction. Our study showed that constantly poor SRH would lead to increased  
11 incidence of frailty, and we believed that this causal relationship was true, because  
12 several studies have identified mechanisms that may possibly link SRH to frailty.  
13 Dysregulation of neuroendocrine processes and the immune system may lead to  
14 further vulnerability and lower resistance [43], and previous studies showed that  
15 inflammatory responses are related to SRH. Christian et al. (2011) found that poorer  
16 SRH was associated with elevated serum inflammatory markers, such as IL-6 and  
17 CRP, among generally healthy older adults [44]. These inflammatory markers have  
18 been associated with frailty. Low physical activity could also be a factor. Granger et  
19 al. (2017) reported that high levels of physical activity were positively associated with  
20 self-rated 'good health' status in European adolescents [45]. Additionally, Savela et  
21 al. (2013) found that a higher level of physical activity from midlife onwards was  
22 strongly associated with a lower risk of frailty in old age [46]. Further investigation is  
23 warranted to explore the intervention to prevent frailty for those people whose SRH  
24 are poor, and its cost-effectiveness.

25

### 1 *Strengths and Limitations*

2 This study has several advantages. First, this eight-year retrospective cohort study was  
3 based on a nationally representative sample with extremely high survey response  
4 rates. The database was based on a large, randomly selected population; thus, external  
5 validity is high. Second, our analysis of SRH trajectory as a predictor of frailty  
6 strengthens the evidence of a causal relationship between SRH and frailty. Moreover,  
7 the study design of trajectory-based model analysis minimized the possibility of  
8 misclassification bias, as SRH can change over time. Third, we adjusted for numerous  
9 confounding factors, including age, gender, level of education, income level, marital  
10 status, major disease, health behaviors, social participation, and unemployment status.  
11 However, this study also has several limitations. First, all data were collected through  
12 self-reporting and not measured objectively, which could result in reporting bias.  
13 Additionally, proxy respondents completed the follow-up questionnaire for subjects  
14 who were severely ill, which may possibly generate reporting bias. Second, the  
15 associations between SRH and frailty could be bi-directional. For example, a subject  
16 may feel poor SRH due to frailty. However, we attempted to address this possibility  
17 by using a longitudinal study design and excluding people with frailty and/or  
18 disability at baseline, as both frailty and/or disability could substantially affect the  
19 outcome. The design of this study also helped to eliminate the possibility of reverse  
20 causality. We also adjusted for a number of major chronic diseases to reduce the  
21 influence of bias. Third, when GBTM was applied, differences between subgroups  
22 could be discussed, but not differences within subgroups. This was because that  
23 GBTM assumed that all individuals in a trajectory class have the same behavior [47].  
24 Thus, different trajectory modelling techniques could be applied to examine the  
25 difference in specific SRH trajectory in future study. Fourth, we used subjective



1 assessment for variables such as self-rated health or income level, and such subjective  
2 assessment could be influenced by mood states such as depression [48] or cognitive  
3 function such as dementia. Thus, we believed that future study is still warranted to  
4 explore the relationship between SRH, depression, dementia and frailty. Fifth,  
5 interaction effects may affect the results, such as women consistently report poorer  
6 SRH compared to men in previous studies. Future study should put emphasis on this  
7 issue. Lastly, survival bias could have occurred due to multiple subjects being lost to  
8 follow-up, which is a common problem in cohort studies. However, our study used a  
9 prospective design and a nationally representative sample, which should have  
10 compensated for this limitation.

11

## 12 **CONCLUSION**

13 Poor SRH in older adults is associated with a higher risk of frailty in the future, and  
14 constantly poor SRH possesses more risk of frailty in the older adults. Moreover,  
15 maintaining stable, good SRH may help to prevent frailty in later life. Thus, we  
16 suggest governments should design and implement programs to regularly screen SRH  
17 in older adults. Further studies are necessary to define practical strategies to reduce  
18 the risk of disability and death among older adults with constantly poor SRH and thus  
19 improve the quality of life of older people.

20

1  
2  
3 **1 FIGURE**

4 **2**  
5 **3 Figure 1.** Flow chart of the study design<sup>1</sup>

6 **4**  
7 **5** Flow chart showing the patient inclusion and exclusion processes, and the process of  
8 **6** group-based trajectory analysis. SRH, self-rated health.

9 **7**  
10 **8 Figure 2.** Trajectories of Self-Rated Health score between 1999 and 2007

11 **9**  
12 **10** After group-based trajectory analysis, there were 232 participants (11.9%, group 1) in  
13 **11** the constant poor SRH group, 1123 participants (57.4%, group 2) in the constant fair  
14 **12** SRH group, 335 participants (17.1%, group 3) were in the constant good SRH group,  
15 **13** and 266 participants (13.6%, group 4) were in the good to fair SRH group.  
16  
17  
18  
19  
20  
21  
22  
23  
24  
25  
26  
27  
28  
29  
30  
31  
32  
33  
34  
35  
36  
37  
38  
39  
40  
41  
42  
43  
44  
45  
46  
47  
48  
49  
50  
51  
52  
53  
54  
55  
56  
57  
58  
59  
60

1  
2  
3 **1 ABBREVIATIONS**  
4

5 2 SRH Self-rated Health  
6

7 3 TLSA Taiwan Longitudinal Study on Aging  
8

9 4 CES-D Center for Epidemiologic Studies Depression Scale  
10  
11

12 5 ADL Activities of Daily Living  
13  
14

15 6  
16  
17  
18  
19  
20  
21  
22  
23  
24  
25  
26  
27  
28  
29  
30  
31  
32  
33  
34  
35  
36  
37  
38  
39  
40  
41  
42  
43  
44  
45  
46  
47  
48  
49  
50  
51  
52  
53  
54  
55  
56  
57  
58  
59  
60

For peer review only

## 1 **DECLARATIONS**

### 2 **Ethics approval and consent to participate**

3 The current study was approved by the Institutional Review Board of Health  
4 Promotion Administration, Ministry of Health and Warfare. (Approval no.  
5 BHP-2007-002). Before recruitment, all participants received a proper explanation  
6 about the study and provided consent for inclusion in the study. Participants who  
7 could read and write signed the written consent documents; those who could not read  
8 nor write impressed the name stamps or handprint with the assistance of their family  
9 members. In addition, legal guardian/representative provided consent on behalf of the  
10 participants with cognitive decline or stroke

### 12 **Consent for publication**

13 Not applicable.

### 15 **Availability of data and materials**

16 The datasets used and analyzed during the current study are not publicly available,  
17 but are available from the corresponding author on reasonable request with the  
18 permission of the Ministry of Health and Welfare, Taiwan.

### 20 **Competing interests**

21 The authors declare no conflicts of interests.

### 23 **Funding**

24 This work was supported by Ministry of Health and Welfare, Taiwan (Grant number:  
25 M06M2346 awarded to M.-C.L.).

1  
2  
3 1  
45 2 **Author Contributions**  
6

7  
8 3 Each author's individual contributions: Meng-Chih Lee conceived of the study and  
9  
10 4 supervised all aspects of its implementation. Wei-Min Chu completed the analyses  
11  
12 5 and drafted the content. Yu-han Hsiao, Shu-Hsin Lee and Pi-Shan Hsu assisted with  
13  
14 6 the study design and revised the content. Hsin-En Ho and Chih-Jung Yeh assisted  
15  
16 7 with the statistical analysis and revised the content. All authors helped to  
17  
18 8 conceptualize ideas, interpret findings, and review drafts of the manuscript.  
19  
20

21 9  
2223  
24 10 **Acknowledgements**  
25

26 11 We thank our colleagues from Chun Shan Medical University, Taichung, Taiwan for  
27  
28 12 providing supports in statistical analysis. The sponsor has no role in the design,  
29  
30 13 methods, subject recruitment, data collections, analysis and preparation of paper.  
31  
32  
33  
34  
35  
36  
37  
38  
39  
40  
41  
42  
43  
44  
45  
46  
47  
48  
49  
50  
51  
52  
53  
54  
55  
56  
57  
58  
59  
60

## 1 REFERENCES

- 2 1. Department of Health EY T: **Taiwan public health report 2017**. 2018.
- 3 2. National Development Council T: **Population projections for Taiwan: 2018-2065**. 2018.
- 4 3. Department of Health EY T: **The statistical analysis of mortality in 2010**. 2011.
- 5 4. Idler EL, Benyamini Y: **Self-rated health and mortality: a review of twenty-seven community studies**. *Journal of health and social behavior* 1997, **38**(1):21-37.
- 6 5. Wu S, Wang R, Zhao Y, Ma X, Wu M, Yan X, He J: **The relationship between self-rated health and objective health status: a population-based study**. *BMC public health* 2013, **13**:320.
- 7 6. Bopp M, Braun J, Gutzwiller F, Faeh D: **Health risk or resource? Gradual and independent association between self-rated health and mortality persists over 30 years**. *PloS one* 2012, **7**(2):e30795.
- 8 7. Giltay EJ, Volllaard AM, Kromhout D: **Self-rated health and physician-rated health as independent predictors of mortality in elderly men**. *Age and ageing* 2012, **41**(2):165-171.
- 9 8. Halford C, Wallman T, Welin L, Rosengren A, Bardel A, Johansson S, Eriksson H, Palmer E, Wilhelmsen L, Svardsudd K: **Effects of self-rated health on sick leave, disability pension, hospital admissions and mortality. A population-based longitudinal study of nearly 15,000 observations among Swedish women and men**. *BMC public health* 2012, **12**:1103.
- 10 9. Jylha M: **What is self-rated health and why does it predict mortality? Towards a unified conceptual model**. *Social science & medicine (1982)* 2009, **69**(3):307-316.
- 11 10. Mavaddat N, Kinmonth AL, Sanderson S, Surtees P, Bingham S, Khaw KT: **What determines Self-Rated Health (SRH)? A cross-sectional study of SF-36 health domains in the EPIC-Norfolk cohort**. *Journal of epidemiology and community health* 2011, **65**(9):800-806.
- 12 11. Sargent-Cox KA, Anstey KJ, Luszcz MA: **The choice of self-rated health measures matter when predicting mortality: evidence from 10 years follow-up of the Australian longitudinal study of ageing**. *BMC geriatrics* 2010, **10**:18.
- 13 12. Stenholm S, Pentti J, Kawachi I, Westerlund H, Kivimaki M, Vahtera J: **Self-rated health in the last 12 years of life compared to matched surviving controls: the Health and Retirement Study**. *PloS one* 2014, **9**(9):e107879.
- 14 13. Fried LP, Tangen CM, Walston J, Newman AB, Hirsch C, Gottdiener J, Seeman T, Tracy R, Kop WJ, Burke G *et al*: **Frailty in older adults: evidence for a phenotype**. *The journals of gerontology Series A, Biological sciences and medical sciences* 2001, **56**(3):M146-156.
- 15 14. Bartley MM, Geda YE, Christianson TJ, Pankratz VS, Roberts RO, Petersen RC: **Frailty and Mortality Outcomes in Cognitively Normal Older People: Sex Differences in a Population-Based Study**. *Journal of the American Geriatrics Society* 2016, **64**(1):132-137.
- 16 15. At J, Bryce R, Prina M, Acosta D, Ferri CP, Guerra M, Huang Y, Rodriguez JJ,

- 1  
2  
3  
4  
5  
6  
7  
8  
9  
10  
11  
12  
13  
14  
15  
16  
17  
18  
19  
20  
21  
22  
23  
24  
25  
26  
27  
28  
29  
30  
31  
32  
33  
34  
35  
36  
37  
38  
39  
40  
41  
42  
43  
44  
45  
46  
47  
48  
49  
50  
51  
52  
53  
54  
55  
56  
57  
58  
59  
60
- 1 Salas A, Sosa AL *et al*: **Frailty and the prediction of dependence and mortality in low- and middle-income countries: a 10/66 population-based cohort study.** *BMC medicine* 2015, **13**:138.
- 2  
3  
4  
5  
6  
7  
8  
9  
10  
11  
12  
13  
14  
15  
16  
17  
18  
19  
20  
21  
22  
23  
24  
25  
26  
27  
28  
29  
30  
31  
32  
33  
34  
35  
36  
37  
38  
39  
40  
41  
42  
43  
44  
45  
46  
47  
48  
49  
50  
51  
52  
53  
54  
55  
56  
57  
58  
59  
60
16. Lin SY, Lee WJ, Chou MY, Peng LN, Chiou ST, Chen LK: **Frailty Index Predicts All-Cause Mortality for Middle-Aged and Older Taiwanese: Implications for Active-Aging Programs.** *PloS one* 2016, **11**(8):e0161456.
17. Kulmala J, Nykanen I, Hartikainen S: **Frailty as a predictor of all-cause mortality in older men and women.** *Geriatrics & gerontology international* 2014, **14**(4):899-905.
18. Vermeiren S, Vella-Azzopardi R, Beckwee D, Habbig AK, Scafoglieri A, Jansen B, Bautmans I: **Frailty and the Prediction of Negative Health Outcomes: A Meta-Analysis.** *Journal of the American Medical Directors Association* 2016, **17**(12):1163.e1161-1163.e1117.
19. Walston J, Buta B, Xue QL: **Frailty Screening and Interventions: Considerations for Clinical Practice.** *Clinics in geriatric medicine* 2018, **34**(1):25-38.
20. Franse CB, van Grieken A, Qin L, Melis RJF, Rietjens JAC, Raat H: **Socioeconomic inequalities in frailty and frailty components among community-dwelling older citizens.** *PloS one* 2017, **12**(11):e0187946.
21. Lau BH, Kwan J, Cheung KS: **Overlap of Frailty, Comorbidity, Disability, and Poor Self-Rated Health in Community-Dwelling Near-Centenarians and Centenarians.** *Journal of the American Geriatrics Society* 2016, **64**(4):900-901.
22. Obaidi MA, Giri S, Mir N, Kenzik K, McDonald AM, Smith CY, Gbolahan OB, Paluri RK, Bhatia S, Williams GR: **Use of self-rated health to identify frailty and predict mortality in older adults with cancer. Results from the care study.** *Journal of Clinical Oncology* 2020, **38**(15\_suppl):12046-12046.
23. Huohvanainen E, Strandberg AY, Stenholm S, Pitkala KH, Tilvis RS, Strandberg TE: **Association of Self-Rated Health in Midlife With Mortality and Old Age Frailty: A 26-Year Follow-Up of Initially Healthy Men.** *The journals of gerontology Series A, Biological sciences and medical sciences* 2016, **71**(7):923-928.
24. Lee J, Cho SI, Chun H, Jung-Choi K, Kang M, Jang SN: **Life course indices for social determinants of self-rated health trajectory in Korean elderly.** *Archives of gerontology and geriatrics* 2017, **70**:186-194.
25. Falconer J, Quesnel-Vallée A: **Pathway from poor self-rated health to mortality: Explanatory power of disease diagnosis.** *Social science & medicine (1982)* 2017, **190**:227-236.
26. Tai CJ, Chen JH, Tseng TG, Lin YT, Hsiao YH, Lee MC, Yang YH: **Prediction of Frailty and Dementia Using Oral Health Impact Profile from a Population-Based Survey.** *International journal of environmental research and public health* 2020, **17**(6).
27. Liang J, Wang CN, Xu X, Hsu HC, Lin HS, Lin YH: **Trajectory of functional status among older Taiwanese: Gender and age variations.** *Social science & medicine (1982)* 2010, **71**(6):1208-1217.
28. Pu C, Tang GJ, Huang N, Chou YJ: **Predictive power of self-rated health for subsequent mortality risk during old age: analysis of data from a nationally representative survey of elderly adults in Taiwan.** *J Epidemiol* 2011,

- 1  
2  
3  
4 1 **21(4):278-284.**
- 5 2 29. Martin LG, Zimmer Z, Hurng BS: **Trends in late-life disability in Taiwan, 1989-2007: the roles of education, environment, and technology.** *Popul Stud (Camb)* 2011, **65(3):289-304.**
- 6 3  
7 4  
8 5 30. Katz S, Ford AB, Moskowitz RW, Jackson BA, Jaffe MW: **STUDIES OF ILLNESS IN THE AGED. THE INDEX OF ADL: A STANDARDIZED MEASURE OF BIOLOGICAL AND PSYCHOSOCIAL FUNCTION.** *JAMA* 1963, **185:914-919.**
- 9 6  
10 7  
11 8 31. Chu WM, Ho HE, Yeh CJ, Tsan YT, Lee SH, Lee MC: **Late-career unemployment and risk of frailty among older adults in Taiwan: An 8-year population-based cohort study.** *Geriatrics & gerontology international* 2021, **21(4):353-358.**
- 12 9  
13 10  
14 11  
15 12 32. de Vries NM, Staal JB, van Ravensberg CD, Hobbelen JS, Olde Rikkert MG, Nijhuis-van der Sanden MW: **Outcome instruments to measure frailty: a systematic review.** *Ageing research reviews* 2011, **10(1):104-114.**
- 16 13  
17 14  
18 15 33. Hsu HC, Chang WC: **Trajectories of frailty and related factors of the older people in Taiwan.** *Experimental aging research* 2015, **41(1):104-114.**
- 19 16  
20 17 34. Ho HE, Yeh CJ, Chu WM, Lee MC: **Midlife Body Mass Index Trajectory and Risk of Frailty 8 Years Later in Taiwan.** *The journal of nutrition, health & aging* 2019, **23(9):849-855.**
- 21 18  
22 19  
23 20 35. Covinsky KE, Eng C, Lui LY, Sands LP, Yaffe K: **The last 2 years of life: functional trajectories of frail older people.** *Journal of the American Geriatrics Society* 2003, **51(4):492-498.**
- 24 21  
25 22  
26 23 36. Nguena Nguetack HL, Pagé MG, Katz J, Choinière M, Vanasse A, Dorais M, Samb OM, Lacasse A: **Trajectory Modelling Techniques Useful to Epidemiological Research: A Comparative Narrative Review of Approaches.** *Clinical epidemiology* 2020, **12:1205-1222.**
- 27 24  
28 25  
29 26 37. Nagin DS, Odgers CL: **Group-based trajectory modeling in clinical research.** *Annual review of clinical psychology* 2010, **6:109-138.**
- 30 27  
31 28  
32 29 38. Dhana K, van Rosmalen J, Vistisen D, Ikram MA, Hofman A, Franco OH, Kavousi M: **Trajectories of body mass index before the diagnosis of cardiovascular disease: a latent class trajectory analysis.** *European journal of epidemiology* 2016, **31(6):583-592.**
- 33 30  
34 31  
35 32 39. Murayama H, Liang J, Bennett JM, Shaw BA, Botosaneanu A, Kobayashi E, Fukaya T, Shinkai S: **Trajectories of Body Mass Index and Their Associations With Mortality Among Older Japanese: Do They Differ From Those of Western Populations?** *American journal of epidemiology* 2015, **182(7):597-605.**
- 36 33  
37 34  
38 35  
39 36 40. Gijzel SMW, van de Leemput IA, Scheffer M, Roppolo M, Olde Rikkert MGM, Melis RJF: **Dynamical Resilience Indicators in Time Series of Self-Rated Health Correspond to Frailty Levels in Older Adults.** *The journals of gerontology Series A, Biological sciences and medical sciences* 2017, **72(7):991-996.**
- 40 37  
41 38  
42 39  
43 40 41. Baddour NA, Robinson-Cohen C, Lipworth L, Bian A, Stewart TG, Jhamb M, Siew ED, Abdel-Kader K: **The Surprise Question and Self-Rated Health Are Useful Screens for Frailty and Disability in Older Adults with Chronic Kidney Disease.** *Journal of palliative medicine* 2019, **22(12):1522-1529.**
- 44 41  
45 42  
46 43  
47 44 42. Pinto JM, Fontaine AM, Neri AL: **The influence of physical and mental health**



- 1  
2  
3  
4  
5  
6  
7  
8  
9  
10  
11  
12  
13  
14  
15  
16  
17  
18  
19  
20  
21  
22  
23  
24  
25  
26  
27  
28  
29  
30  
31  
32  
33  
34  
35  
36  
37  
38  
39  
40  
41  
42  
43  
44  
45  
46  
47  
48  
49  
50  
51  
52  
53  
54  
55  
56  
57  
58  
59  
60
- 1            **on life satisfaction is mediated by self-rated health: A study with Brazilian**  
2            **elderly.** *Archives of gerontology and geriatrics* 2016, **65**:104-110.
- 3            43.        Lutgendorf SK, Costanzo ES: **Psychoneuroimmunology and health**  
4            **psychology: an integrative model.** *Brain, behavior, and immunity* 2003,  
5            **17(4):225-232.**
- 6            44.        Christian LM, Glaser R, Porter K, Malarkey WB, Beversdorf D, Kiecolt-Glaser  
7            JK: **Poorer self-rated health is associated with elevated inflammatory**  
8            **markers among older adults.** *Psychoneuroendocrinology* 2011,  
9            **36(10):1495-1504.**
- 10          45.        Granger E, Williams G, Di Nardo F, Harrison A, Verma A: **The relationship**  
11          **between physical activity and self-rated health status in European**  
12          **adolescents: Results of the EURO-URHIS 2 survey.** *European journal of public*  
13          *health* 2017, **27(suppl\_2):107-111.**
- 14          46.        Savela SL, Koistinen P, Stenholm S, Tilvis RS, Strandberg AY, Pitkala KH,  
15          Salomaa VV, Strandberg TE: **Leisure-time physical activity in midlife is**  
16          **related to old age frailty.** *The journals of gerontology Series A, Biological*  
17          *sciences and medical sciences* 2013, **68(11):1433-1438.**
- 18          47.        Muthén B, Muthén LK: **Integrating person-centered and variable-centered**  
19          **analyses: growth mixture modeling with latent trajectory classes.**  
20          *Alcoholism, clinical and experimental research* 2000, **24(6):882-891.**
- 21          48.        Chu WM, Liao WC, Li CR, Lee SH, Tang YJ, Ho HE, Lee MC: **Late-career**  
22          **unemployment and all-cause mortality, functional disability and depression**  
23          **among the older adults in Taiwan: A 12-year population-based cohort**  
24          **study.** *Archives of gerontology and geriatrics* 2016, **65**:192-198.

## 1 TABLES

2

Table 1. Demographic and clinical characteristics of the participants grouped by SRH trajectories

| Characteristics      | Total<br>n=1956 | SRH Trajectory   |                   |                  |                  | P value  |
|----------------------|-----------------|------------------|-------------------|------------------|------------------|----------|
|                      |                 | Group 1<br>n=232 | Group 2<br>n=1123 | Group 3<br>n=335 | Group 4<br>n=266 |          |
| Age                  | 61.46(4.8)      | 62.42(4.5)       | 61.56(4.8)        | 60.75(4.8)       | 61.11(4.9)       | 0.0003*  |
| Sex                  |                 |                  |                   |                  |                  | <0.0001* |
| Male                 | 1025(52.4%)     | 104(44.8%)       | 547(48.7%)        | 210(62.7%)       | 164(61.65%)      |          |
| Female               | 931(47.6%)      | 128(55.2%)       | 576(51.3%)        | 125(37.3%)       | 102(38.35%)      |          |
| Level of education   |                 |                  |                   |                  |                  | <0.0001* |
| illiterate           | 473(24.18%)     | 82(35.3%)        | 301(26.8%)        | 41(12.2%)        | 49(18.4%)        |          |
| 1~6 yrs              | 987(50.46%)     | 120(51.7%)       | 573(51%)          | 164(49%)         | 130(48.9%)       |          |
| 7~12 yrs             | 374(19.12%)     | 26(11.2%)        | 191(17%)          | 93(27.8%)        | 64(24.1%)        |          |
| >12 yrs              | 122(6.24%)      | 4(1.7%)          | 58(5.2%)          | 37(11%)          | 23(8.7%)         |          |
| Income               |                 |                  |                   |                  |                  | <0.0001* |
| Poor                 | 416(21.81%)     | 76(33.9%)        | 246(22.5%)        | 43(13.1%)        | 51(19.8%)        |          |
| Fair                 | 860(45.1%)      | 102(45.5%)       | 513(46.8%)        | 143(43.5%)       | 102(39.5%)       |          |
| Good                 | 631(33.09%)     | 46(20.5%)        | 337(30.8%)        | 143(43.5%)       | 105(40.7%)       |          |
| Social participation |                 |                  |                   |                  |                  | 0.0003*  |
| No                   | 475(24.28%)     | 61(26.3%)        | 305(27.2%)        | 56(16.7%)        | 53(19.9%)        |          |
| Yes                  | 1481(75.72%)    | 171(73.7%)       | 818(72.8%)        | 279(83.3%)       | 213(80.1%)       |          |
| Marriage             |                 |                  |                   |                  |                  | 0.0316*  |
| No                   | 356(18.2%)      | 46(19.8%)        | 215(19.2%)        | 42(12.5%)        | 53(19.9%)        |          |

|                     |     |              |            |            |            |            |          |
|---------------------|-----|--------------|------------|------------|------------|------------|----------|
|                     | Yes | 1600(81.8%)  | 186(80.2%) | 908(80.9%) | 293(87.5%) | 213(80.1%) |          |
| Smoking             | No  | 1415(72.34%) | 173(74.6%) | 826(73.6%) | 240(71.6%) | 176(66.2%) | 0.0876*  |
|                     | Yes | 541(27.66%)  | 59(25.4%)  | 297(26.5%) | 95(28.4%)  | 90(33.8%)  |          |
| Alcohol consumption | No  | 1361(69.62%) | 181(78.4%) | 817(72.8%) | 204(60.9%) | 159(59.8%) | <0.0001* |
|                     | Yes | 594(30.38%)  | 50(21.7%)  | 306(27.3%) | 131(39.1%) | 107(40.2%) |          |
| Unemployment        | No  | 816(41.82%)  | 75(32.6%)  | 431(38.5%) | 178(53.1%) | 132(49.6%) | <0.0001* |
|                     | Yes | 1135(58.18%) | 155(67.4%) | 689(61.5%) | 157(46.9%) | 134(50.4%) |          |
| Number of diseases  |     | 1.21(1.29)   | 1.92(1.55) | 1.35(1.31) | 0.63(0.92) | 0.74(0.89) | <0.0001* |

Notes. Data in tables are numbers(%) for categorical variables and means (SD) for continuous variables. Group 1 refers to constant poor SRH group; Group 2 refers to constant fair SRH group; Group 3 refers to constant good SRH group; Group 4 refers to good to fair SRH group  
\* P<0.05

1  
2

Table 2. Univariate logistic regression of demographic and clinical characteristics predicting frailty

|                      |            | Frailty |           |         |
|----------------------|------------|---------|-----------|---------|
|                      |            | OR      | 95%CI     | P value |
| Age                  |            | 1.12*   | 1.08-1.16 | <.0001  |
| Sex                  |            |         |           |         |
|                      | Male       | Ref     |           | <.0001  |
|                      | Female     | 2.06*   | 1.44-2.95 |         |
| Level of education   |            |         |           |         |
|                      | illiterate | Ref     |           |         |
|                      | 1~6 years  | 0.57*   | 0.38-0.81 | 0.0019  |
|                      | 7~12 years | 0.24*   | 0.13-0.46 | <0.0001 |
|                      | >12 years  | 0.06*   | 0.01-0.42 | 0.005   |
| Income satisfaction  |            |         |           |         |
|                      | Good       | Ref     |           |         |
|                      | Fair       | 1.41    | 0.91-2.18 | 0.1259  |
|                      | Poor       | 2.32*   | 1.45-3.73 | 0.0005  |
| Social participation |            |         |           |         |
|                      | Yes        | 0.64*   | 0.44-0.93 | <0.0001 |
|                      | No         | Ref     |           |         |
| Marriage             |            |         |           |         |
|                      | Yes        | Ref     |           |         |
|                      | No         | 1.28    | 0.83-1.96 | 0.2665  |
| Smoking              |            |         |           |         |
|                      | Yes        | 0.7     | 0.46-1.07 | 0.0991  |

|                     |      |       |           |         |
|---------------------|------|-------|-----------|---------|
|                     | No   | Ref   |           |         |
| Alcohol consumption | Yes  | 0.57* | 0.37-0.86 | 0.0082  |
|                     | No   | Ref   |           |         |
| Unemployment        | Yes  | 2.89* | 1.91-4.36 | <0.0001 |
|                     | No   | Ref   |           |         |
| Self-Rated Health   | Good | 0.17* | 0.17-0.27 | <0.0001 |
|                     | Fair | 0.43  | 0.29-0.64 | <0.0001 |
|                     | Poor | Ref   |           |         |
| Number of diseases  |      | 1.41* | 1.25-1.59 | <.0001  |

\* P<0.05

1

Table 3. Multivariate logistic regression of SRH trajectories predicting frailty

|                      |            | Frailty |           |         |
|----------------------|------------|---------|-----------|---------|
|                      |            | OR      | 95%CI     | P value |
| Age                  |            | 1.10*   | 1.06-1.16 | <.0001  |
| Sex                  |            |         |           |         |
|                      | Male       | Ref     |           |         |
|                      | Female     | 1.29*   | 0.81-2.05 | 0.2803  |
| Level of education   |            |         |           |         |
|                      | illiterate | Ref     |           |         |
|                      | 1~6 years  | 0.79    | 0.52-1.21 | 0.2811  |
|                      | 7~12 years | 0.49    | 0.24-1.08 | 0.0523  |
|                      | >12 years  | 0.16    | 0.02-1.43 | 0.1058  |
| Income satisfaction  |            |         |           |         |
|                      | Good       | Ref     |           |         |
|                      | Fair       | 1.04    | 0.65-1.67 | 0.8746  |
|                      | Poor       | 1.73*   | 1.02-2.93 | 0.0413  |
| Social Participation |            |         |           |         |
|                      | Yes        | 1.30    | 0.83-2.02 | 0.2558  |
|                      | No         | Ref     |           |         |
| Alcohol consumption  |            |         |           |         |
|                      | Yes        | 1.06    | 0.63-1.76 | 0.8382  |
|                      | No         | Ref     |           |         |
| Unemployment         |            |         |           |         |
|                      | Yes        | 2.00*   | 1.22-3.27 | 0.0059  |

|                              | No      | Ref   |           |        |
|------------------------------|---------|-------|-----------|--------|
| Self-Rated Health trajectory |         |       |           |        |
|                              | Group 1 | 3.09* | 2.04-4.69 | <.0001 |
|                              | Group 2 | Ref   |           |        |
|                              | Group 3 | 0.04* | 0.01-0.32 | 0.0021 |
|                              | Group 4 | 0.19* | 0.06-0.63 | 0.0061 |
| Number of diseases           |         | 1.10  | 0.96-1.27 | 0.1645 |

1 Notes. Group 1 refers to constant poor SRH group; Group 2 refers to constant fair SRH group; Group 3 refers to constant good SRH group;  
 2 Group 4 refers to good to fair SRH group  
 3 \* P<0.0

1  
2  
3  
4  
5  
6  
7  
8  
9  
10  
11  
12  
13  
14  
15  
16  
17  
18  
19  
20  
21  
22  
23  
24  
25  
26  
27  
28  
29  
30  
31  
32  
33  
34  
35  
36  
37  
38  
39  
40  
41  
42  
43  
44  
45  
46  
47  
48  
49  
50  
51  
52  
53  
54  
55  
56  
57  
58  
59  
60

1

For peer review only



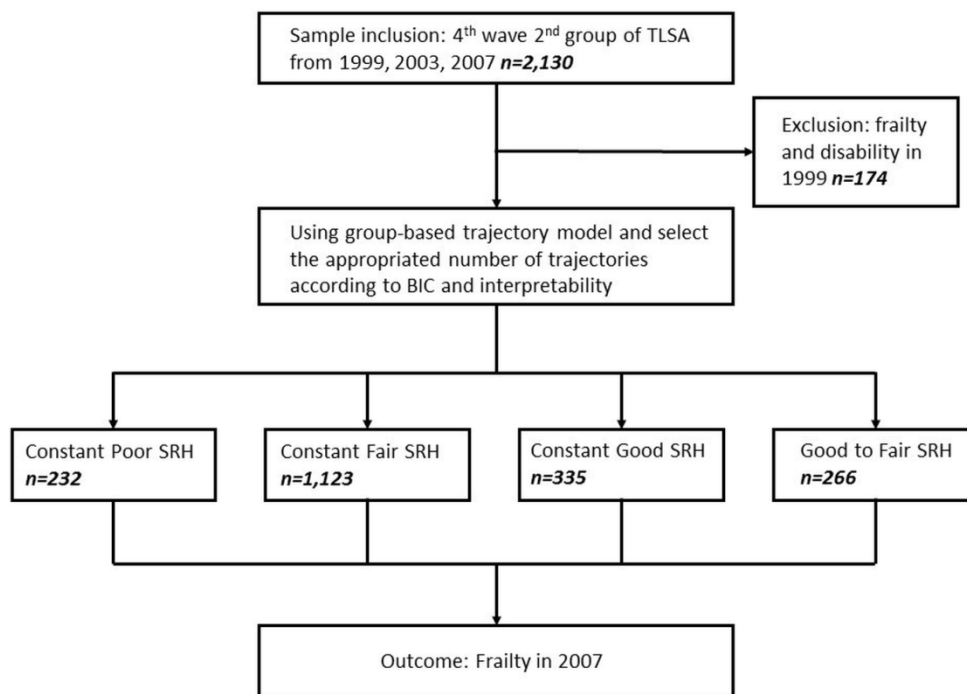

Figure 1. Flow chart of the study design

1  
2  
3  
4  
5  
6  
7  
8  
9  
10  
11  
12  
13  
14  
15  
16  
17  
18  
19  
20  
21  
22  
23  
24  
25  
26  
27  
28  
29  
30  
31  
32  
33  
34  
35  
36  
37  
38  
39  
40  
41  
42  
43  
44  
45  
46  
47  
48  
49  
50  
51  
52  
53  
54  
55  
56  
57  
58  
59  
60

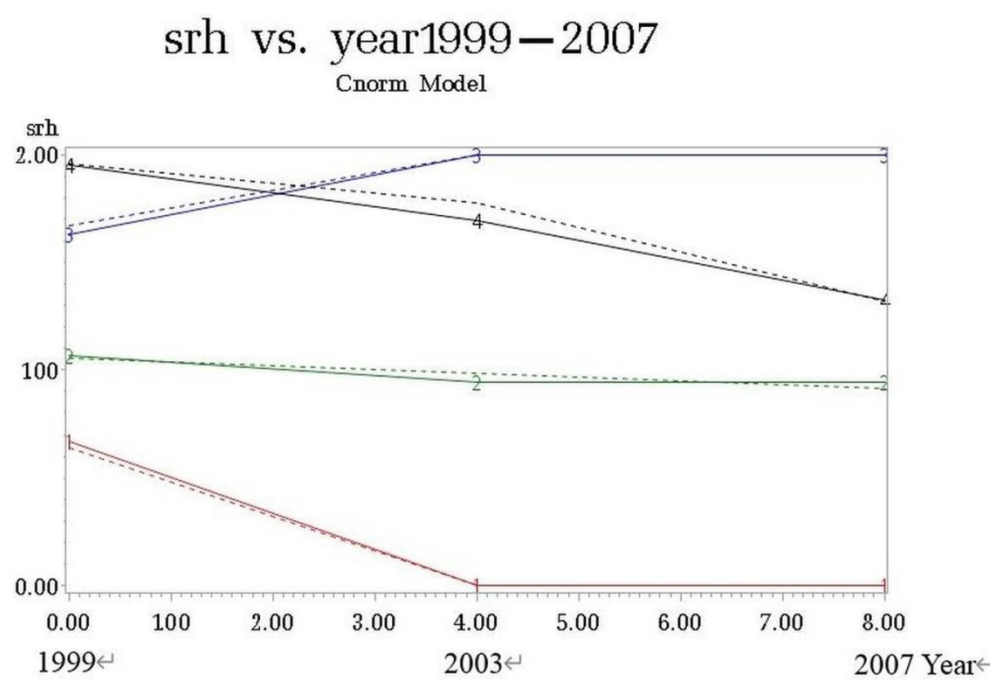

Figure 2. Trajectories of Self-Rated Health score between 1999 and 2007

# Reporting checklist for cohort study.

Based on the STROBE cohort guidelines.

## Instructions to authors

Complete this checklist by entering the page numbers from your manuscript where readers will find each of the items listed below.

Your article may not currently address all the items on the checklist. Please modify your text to include the missing information. If you are certain that an item does not apply, please write "n/a" and provide a short explanation.

Upload your completed checklist as an extra file when you submit to a journal.

In your methods section, say that you used the STROBE cohort reporting guidelines, and cite them as:

von Elm E, Altman DG, Egger M, Pocock SJ, Gøtzsche PC, Vandenbroucke JP. The Strengthening the Reporting of Observational Studies in Epidemiology (STROBE) Statement: guidelines for reporting observational studies.

|                           |                     |                                                                                    | Page   |
|---------------------------|---------------------|------------------------------------------------------------------------------------|--------|
|                           |                     | Reporting Item                                                                     | Number |
| <b>Title and abstract</b> |                     |                                                                                    |        |
| Title                     | <a href="#">#1a</a> | Indicate the study's design with a commonly used term in the title or the abstract | 1      |
| Abstract                  | <a href="#">#1b</a> | Provide in the abstract an informative and balanced summary                        | 3      |

of what was done and what was found

## Introduction

Background / [#2](#) Explain the scientific background and rationale for the 5  
rationale investigation being reported

Objectives [#3](#) State specific objectives, including any prespecified 6  
hypotheses

## Methods

Study design [#4](#) Present key elements of study design early in the paper 6

Setting [#5](#) Describe the setting, locations, and relevant dates, including 6  
periods of recruitment, exposure, follow-up, and data collection

Eligibility criteria [#6a](#) Give the eligibility criteria, and the sources and methods of 7  
selection of participants. Describe methods of follow-up.

Eligibility criteria [#6b](#) For matched studies, give matching criteria and number of 7  
exposed and unexposed n/a

Variables [#7](#) Clearly define all outcomes, exposures, predictors, potential 7  
confounders, and effect modifiers. Give diagnostic criteria, if  
applicable

Data sources / [#8](#) For each variable of interest give sources of data and details of 7  
measurement methods of assessment (measurement). Describe  
comparability of assessment methods if there is more than one  
group. Give information separately for for exposed and  
unexposed groups if applicable.

|    |                |                      |                                                                   |   |
|----|----------------|----------------------|-------------------------------------------------------------------|---|
| 1  | Bias           | <a href="#">#9</a>   | Describe any efforts to address potential sources of bias         | 7 |
| 2  |                |                      |                                                                   |   |
| 3  |                |                      |                                                                   |   |
| 4  | Study size     | <a href="#">#10</a>  | Explain how the study size was arrived at                         | 7 |
| 5  |                |                      |                                                                   |   |
| 6  |                |                      |                                                                   |   |
| 7  | Quantitative   | <a href="#">#11</a>  | Explain how quantitative variables were handled in the            | 7 |
| 8  | variables      |                      | analyses. If applicable, describe which groupings were chosen,    |   |
| 9  |                |                      | and why                                                           |   |
| 10 |                |                      |                                                                   |   |
| 11 |                |                      |                                                                   |   |
| 12 |                |                      |                                                                   |   |
| 13 |                |                      |                                                                   |   |
| 14 |                |                      |                                                                   |   |
| 15 | Statistical    | <a href="#">#12a</a> | Describe all statistical methods, including those used to control |   |
| 16 | methods        |                      | for confounding                                                   |   |
| 17 |                |                      |                                                                   |   |
| 18 |                |                      |                                                                   |   |
| 19 |                |                      |                                                                   |   |
| 20 | 8              |                      |                                                                   |   |
| 21 |                |                      |                                                                   |   |
| 22 |                |                      |                                                                   |   |
| 23 | Statistical    | <a href="#">#12b</a> | Describe any methods used to examine subgroups and                | 8 |
| 24 | methods        |                      | interactions                                                      |   |
| 25 |                |                      |                                                                   |   |
| 26 |                |                      |                                                                   |   |
| 27 |                |                      |                                                                   |   |
| 28 |                |                      |                                                                   |   |
| 29 | Statistical    | <a href="#">#12c</a> | Explain how missing data were addressed                           | 8 |
| 30 | methods        |                      |                                                                   |   |
| 31 |                |                      |                                                                   |   |
| 32 |                |                      |                                                                   |   |
| 33 |                |                      |                                                                   |   |
| 34 | Statistical    | <a href="#">#12d</a> | If applicable, explain how loss to follow-up was addressed        | 8 |
| 35 | methods        |                      |                                                                   |   |
| 36 |                |                      |                                                                   |   |
| 37 |                |                      |                                                                   |   |
| 38 |                |                      |                                                                   |   |
| 39 | Statistical    | <a href="#">#12e</a> | Describe any sensitivity analyses                                 |   |
| 40 | methods        |                      |                                                                   |   |
| 41 |                |                      |                                                                   |   |
| 42 |                |                      |                                                                   |   |
| 43 |                |                      |                                                                   |   |
| 44 |                |                      |                                                                   |   |
| 45 | 8              |                      |                                                                   |   |
| 46 |                |                      |                                                                   |   |
| 47 |                |                      |                                                                   |   |
| 48 | <b>Results</b> |                      |                                                                   |   |
| 49 |                |                      |                                                                   |   |
| 50 |                |                      |                                                                   |   |
| 51 | Participants   | <a href="#">#13a</a> | Report numbers of individuals at each stage of study—eg           | 9 |
| 52 |                |                      | numbers potentially eligible, examined for eligibility, confirmed |   |
| 53 |                |                      | eligible, included in the study, completing follow-up, and        |   |
| 54 |                |                      | analysed. Give information separately for for exposed and         |   |
| 55 |                |                      |                                                                   |   |
| 56 |                |                      |                                                                   |   |
| 57 |                |                      |                                                                   |   |
| 58 |                |                      |                                                                   |   |
| 59 |                |                      |                                                                   |   |
| 60 |                |                      |                                                                   |   |

unexposed groups if applicable.

|    |                  |                      |                                                               |
|----|------------------|----------------------|---------------------------------------------------------------|
| 1  |                  |                      |                                                               |
| 2  |                  |                      |                                                               |
| 3  |                  |                      |                                                               |
| 4  | Participants     | <a href="#">#13b</a> | Give reasons for non-participation at each stage 9            |
| 5  |                  |                      |                                                               |
| 6  | Participants     | <a href="#">#13c</a> | Consider use of a flow diagram                                |
| 7  |                  |                      |                                                               |
| 8  |                  |                      |                                                               |
| 9  |                  |                      |                                                               |
| 10 | 9                |                      |                                                               |
| 11 |                  |                      |                                                               |
| 12 |                  |                      |                                                               |
| 13 | Descriptive data | <a href="#">#14a</a> | Give characteristics of study participants (eg demographic, 9 |
| 14 |                  |                      |                                                               |
| 15 |                  |                      | clinical, social) and information on exposures and potential  |
| 16 |                  |                      | confounders. Give information separately for exposed and      |
| 17 |                  |                      | unexposed groups if applicable.                               |
| 18 |                  |                      |                                                               |
| 19 |                  |                      |                                                               |
| 20 |                  |                      |                                                               |
| 21 |                  |                      |                                                               |
| 22 | Descriptive data | <a href="#">#14b</a> | Indicate number of participants with missing data for each    |
| 23 |                  |                      | variable of interest                                          |
| 24 |                  |                      |                                                               |
| 25 |                  |                      |                                                               |
| 26 |                  |                      |                                                               |
| 27 |                  |                      |                                                               |
| 28 | 12               |                      |                                                               |
| 29 |                  |                      |                                                               |
| 30 |                  |                      |                                                               |
| 31 | Descriptive data | <a href="#">#14c</a> | Summarise follow-up time (eg, average and total amount)       |
| 32 |                  |                      |                                                               |
| 33 |                  |                      |                                                               |
| 34 | 9                |                      |                                                               |
| 35 |                  |                      |                                                               |
| 36 |                  |                      |                                                               |
| 37 | Outcome data     | <a href="#">#15</a>  | Report numbers of outcome events or summary measures          |
| 38 |                  |                      | over time. Give information separately for exposed and        |
| 39 |                  |                      | unexposed groups if applicable.                               |
| 40 |                  |                      |                                                               |
| 41 |                  |                      |                                                               |
| 42 |                  |                      |                                                               |
| 43 |                  |                      |                                                               |
| 44 |                  |                      |                                                               |
| 45 | 9                |                      |                                                               |
| 46 |                  |                      |                                                               |
| 47 |                  |                      |                                                               |
| 48 | Main results     | <a href="#">#16a</a> | Give unadjusted estimates and, if applicable, confounder- 9   |
| 49 |                  |                      |                                                               |
| 50 |                  |                      | adjusted estimates and their precision (eg, 95% confidence    |
| 51 |                  |                      | interval). Make clear which confounders were adjusted for and |
| 52 |                  |                      | why they were included                                        |
| 53 |                  |                      |                                                               |
| 54 |                  |                      |                                                               |
| 55 |                  |                      |                                                               |
| 56 |                  |                      |                                                               |
| 57 |                  |                      |                                                               |
| 58 | Main results     | <a href="#">#16b</a> | Report category boundaries when continuous variables were 9   |
| 59 |                  |                      |                                                               |
| 60 |                  |                      |                                                               |

|    |                          |                                                                                        |    |
|----|--------------------------|----------------------------------------------------------------------------------------|----|
| 1  |                          | categorized                                                                            |    |
| 2  |                          |                                                                                        |    |
| 3  |                          |                                                                                        |    |
| 4  | Main results             | <a href="#">#16c</a> If relevant, consider translating estimates of relative risk into |    |
| 5  |                          |                                                                                        |    |
| 6  |                          | absolute risk for a meaningful time period                                             |    |
| 7  |                          |                                                                                        |    |
| 8  |                          |                                                                                        |    |
| 9  | n/a                      |                                                                                        |    |
| 10 |                          |                                                                                        |    |
| 11 |                          |                                                                                        |    |
| 12 | Other analyses           | <a href="#">#17</a> Report other analyses done—eg analyses of subgroups and            | 9  |
| 13 |                          |                                                                                        |    |
| 14 |                          | interactions, and sensitivity analyses                                                 |    |
| 15 |                          |                                                                                        |    |
| 16 |                          |                                                                                        |    |
| 17 | <b>Discussion</b>        |                                                                                        |    |
| 18 |                          |                                                                                        |    |
| 19 |                          |                                                                                        |    |
| 20 | Key results              | <a href="#">#18</a> Summarise key results with reference to study objectives           | 11 |
| 21 |                          |                                                                                        |    |
| 22 |                          |                                                                                        |    |
| 23 | Limitations              | <a href="#">#19</a> Discuss limitations of the study, taking into account sources of   | 13 |
| 24 |                          |                                                                                        |    |
| 25 |                          | potential bias or imprecision. Discuss both direction and                              |    |
| 26 |                          |                                                                                        |    |
| 27 |                          | magnitude of any potential bias.                                                       |    |
| 28 |                          |                                                                                        |    |
| 29 |                          |                                                                                        |    |
| 30 |                          |                                                                                        |    |
| 31 | Interpretation           | <a href="#">#20</a> Give a cautious overall interpretation considering objectives,     | 13 |
| 32 |                          |                                                                                        |    |
| 33 |                          | limitations, multiplicity of analyses, results from similar studies,                   |    |
| 34 |                          |                                                                                        |    |
| 35 |                          | and other relevant evidence.                                                           |    |
| 36 |                          |                                                                                        |    |
| 37 |                          |                                                                                        |    |
| 38 |                          |                                                                                        |    |
| 39 | Generalisability         | <a href="#">#21</a> Discuss the generalisability (external validity) of the study      | 14 |
| 40 |                          |                                                                                        |    |
| 41 |                          | results                                                                                |    |
| 42 |                          |                                                                                        |    |
| 43 |                          |                                                                                        |    |
| 44 | <b>Other Information</b> |                                                                                        |    |
| 45 |                          |                                                                                        |    |
| 46 |                          |                                                                                        |    |
| 47 | Funding                  | <a href="#">#22</a> Give the source of funding and the role of the funders for the     | 16 |
| 48 |                          |                                                                                        |    |
| 49 |                          | present study and, if applicable, for the original study on which                      |    |
| 50 |                          |                                                                                        |    |
| 51 |                          | the present article is based                                                           |    |
| 52 |                          |                                                                                        |    |
| 53 |                          |                                                                                        |    |
| 54 |                          |                                                                                        |    |
| 55 |                          |                                                                                        |    |
| 56 |                          |                                                                                        |    |
| 57 |                          |                                                                                        |    |
| 58 |                          |                                                                                        |    |
| 59 |                          |                                                                                        |    |
| 60 |                          |                                                                                        |    |

1 The STROBE checklist is distributed under the terms of the Creative Commons Attribution License  
2  
3 CC-BY. This checklist was completed on 01. February 2021 using <https://www.goodreports.org/>, a  
4  
5 tool made by the [EQUATOR Network](#) in collaboration with [Penelope.ai](#)  
6  
7  
8  
9  
10  
11  
12  
13  
14  
15  
16  
17  
18  
19  
20  
21  
22  
23  
24  
25  
26  
27  
28  
29  
30  
31  
32  
33  
34  
35  
36  
37  
38  
39  
40  
41  
42  
43  
44  
45  
46  
47  
48  
49  
50  
51  
52  
53  
54  
55  
56  
57  
58  
59  
60



# BMJ Open

## Self-rated health trajectory and frailty among community-dwelling older adults: evidence from the Taiwan Longitudinal Study on Aging (TLSA)

|                                 |                                                                                                                                                                                                                                                                                                                                                                                                                                                                                                                                                                                                                                                                                                                                                                                          |
|---------------------------------|------------------------------------------------------------------------------------------------------------------------------------------------------------------------------------------------------------------------------------------------------------------------------------------------------------------------------------------------------------------------------------------------------------------------------------------------------------------------------------------------------------------------------------------------------------------------------------------------------------------------------------------------------------------------------------------------------------------------------------------------------------------------------------------|
| Journal:                        | <i>BMJ Open</i>                                                                                                                                                                                                                                                                                                                                                                                                                                                                                                                                                                                                                                                                                                                                                                          |
| Manuscript ID                   | bmjopen-2021-049795.R2                                                                                                                                                                                                                                                                                                                                                                                                                                                                                                                                                                                                                                                                                                                                                                   |
| Article Type:                   | Original research                                                                                                                                                                                                                                                                                                                                                                                                                                                                                                                                                                                                                                                                                                                                                                        |
| Date Submitted by the Author:   | 02-Jul-2021                                                                                                                                                                                                                                                                                                                                                                                                                                                                                                                                                                                                                                                                                                                                                                              |
| Complete List of Authors:       | Chu, Wei-Min ; Taichung Veterans General Hospital, Department of Family Medicine; National Yang-Ming University, School of Medicine<br>Ho, Hsin-En; Taichung Armed Forces General Hospital, Department of Family medicine; Chung Shan Medical University, Institution of Medicine<br>Yeh, Chih-Jung; Chung Shan Medical University, School of Public Health<br>Hsiao, Yu-han; Taichung Hospital, Department of Family Medicine; Chung Shan Medical University, School of Public Health<br>Hsu, Pi-Shan; Taichung Veterans General Hospital, Department of Family Medicine<br>Lee, Shu-Hsin; Chung Shan Medical University, School of Nursing<br>Lee, Meng-Chih ; Taichung Hospital, Department of Family Medicine; National Health Research Institutes, Institute of Population Sciences |
| <b>Primary Subject Heading</b>: | Geriatric medicine                                                                                                                                                                                                                                                                                                                                                                                                                                                                                                                                                                                                                                                                                                                                                                       |
| Secondary Subject Heading:      | Epidemiology, Public health                                                                                                                                                                                                                                                                                                                                                                                                                                                                                                                                                                                                                                                                                                                                                              |
| Keywords:                       | GERIATRIC MEDICINE, PUBLIC HEALTH, EPIDEMIOLOGY                                                                                                                                                                                                                                                                                                                                                                                                                                                                                                                                                                                                                                                                                                                                          |
|                                 |                                                                                                                                                                                                                                                                                                                                                                                                                                                                                                                                                                                                                                                                                                                                                                                          |

SCHOLARONE™  
Manuscripts



I, the Submitting Author has the right to grant and does grant on behalf of all authors of the Work (as defined in the below author licence), an exclusive licence and/or a non-exclusive licence for contributions from authors who are: i) UK Crown employees; ii) where BMJ has agreed a CC-BY licence shall apply, and/or iii) in accordance with the terms applicable for US Federal Government officers or employees acting as part of their official duties; on a worldwide, perpetual, irrevocable, royalty-free basis to BMJ Publishing Group Ltd ("BMJ") its licensees and where the relevant Journal is co-owned by BMJ to the co-owners of the Journal, to publish the Work in this journal and any other BMJ products and to exploit all rights, as set out in our [licence](#).

The Submitting Author accepts and understands that any supply made under these terms is made by BMJ to the Submitting Author unless you are acting as an employee on behalf of your employer or a postgraduate student of an affiliated institution which is paying any applicable article publishing charge ("APC") for Open Access articles. Where the Submitting Author wishes to make the Work available on an Open Access basis (and intends to pay the relevant APC), the terms of reuse of such Open Access shall be governed by a Creative Commons licence – details of these licences and which [Creative Commons](#) licence will apply to this Work are set out in our licence referred to above.

Other than as permitted in any relevant BMJ Author's Self Archiving Policies, I confirm this Work has not been accepted for publication elsewhere, is not being considered for publication elsewhere and does not duplicate material already published. I confirm all authors consent to publication of this Work and authorise the granting of this licence.

1  
2  
3  
4  
5  
6  
7  
8  
9  
10  
11  
12  
13  
14

1 **TITLE**

2 Self-rated health trajectory and frailty among community-dwelling older adults: evidence from the  
3 Taiwan Longitudinal Study on Aging (TLSA)

15  
16  
17  
18  
19  
20  
21  
22  
23  
24  
25  
26  
27  
28  
29  
30  
31  
32  
33  
34  
35  
36  
37  
38  
39  
40  
41  
42  
43  
44  
45  
46  
47  
48  
49  
50  
51  
52  
53  
54  
55  
56  
57  
58  
59  
60

5 **AUTHORS and AFFILIATIONS**

6 Wei-Min Chu<sup>1,2,3</sup>, Hsin-En Ho<sup>4,5,6</sup>, Chih-Jung Yeh<sup>7</sup>, Yu-han Hsiao<sup>7,8</sup>, Pi-Shan Hsu<sup>1</sup>, Shu-Hsin  
7 Lee<sup>9,10</sup>, Meng-Chih Lee<sup>8,11</sup>

8 <sup>1</sup>Department of Family Medicine, Taichung Veterans General Hospital, Taichung, Taiwan

9 <sup>2</sup>School of Medicine, Chung Shan Medical University, Taichung, Taiwan

10 <sup>3</sup>School of Medicine, National Yang-Ming University, Taipei, Taiwan

11 <sup>4</sup>Department of Family Medicine, Taichung Armed Force General Hospital, Taichung, Taiwan.

12 <sup>5</sup>Institute of Medicine, Chung Shan Medical University, Taichung, Taiwan

13 <sup>6</sup>National Defense Medical Center, Taipei, Taiwan

14 <sup>7</sup>School of Public Health, Chung Shan Medical University, Taichung, Taiwan

15 <sup>8</sup>Department of Family Medicine, Taichung Hospital, Ministry of Health and Welfare, Taichung,  
16 Taiwan

17 <sup>9</sup>School of Nursing, Chung Shan Medical University, Taichung, Taiwan

18 <sup>10</sup>Center for Education and Research on Geriatrics and Gerontology, Chung Shan Medical  
19 University, Taichung, Taiwan

20 <sup>11</sup>Institute of Population Sciences, National Health Research Institutes, Miaoli County, Taiwan

1     **1     Corresponding author:**

2  
3  
4     **2     Meng-Chih Lee, M.D., Ph.D., MPH**

5  
6  
7     **3**

8  
9  
10    **4     Department of Family Medicine**

11  
12    **5     Taichung Hospital, Ministry of Health and Welfare**

13  
14  
15    **6     Taichung, Taiwan**

16  
17  
18    **7     Postal Address: No. 199, Sec. 1, Sanmin Rd., West Dist., Taichung City 403,**

19  
20  
21    **8     Taiwan (R.O.C.)**

22  
23  
24    **9     Phone: 04-22294411**

25  
26    **10    mengchihlee@gmail.com**

27  
28  
29    **11**

30  
31  
32    **12    Word counts: 3087**

33  
34  
35    **13**

## 1 ABSTRACT

2  
3  
4 **Objectives:** Self-rated health (SRH) is an assessment and predictor of health based on an  
5  
6  
7 individual's general condition; however, evidence of the value of SRH for predicting frailty  
8  
9  
10  
11  
12  
13  
14  
15  
16  
17  
18  
19  
20  
21  
22  
23  
24  
25  
26  
27  
28  
29  
30  
31  
32  
33  
34  
35  
36  
37  
38  
39  
40  
41  
42  
43  
44  
45  
46  
47  
48  
49  
50  
51  
52  
53  
54  
55  
56  
57  
58  
59  
60  
4 remains scarce for older Asian adults. This study aimed to evaluate the relationship between self-  
5 rated health (SRH) score trajectory and frailty among older individuals in Taiwan.

6 **Design:** An 8-year retrospective cohort study.

7 **Setting:** Data were retrieved from the Taiwan Longitudinal Study on Aging from 1999 to 2007.

8 **Participants:** Respondents aged 53 to 69 years old who were not frail or disabled in 1999  
9  
10  
11  
12  
13  
14  
15  
16  
17  
18  
19  
20  
21  
22  
23  
24  
25  
26  
27  
28  
29  
30  
31  
32  
33  
34  
35  
36  
37  
38  
39  
40  
41  
42  
43  
44  
45  
46  
47  
48  
49  
50  
51  
52  
53  
54  
55  
56  
57  
58  
59  
60  
( $n=1956$ ).

10 **Primary and Secondary Outcome Measures:** Frailty was defined using the Fried criteria. The  
11  
12  
13  
14  
15  
16  
17  
18  
19  
20  
21  
22  
23  
24  
25  
26  
27  
28  
29  
30  
31  
32  
33  
34  
35  
36  
37  
38  
39  
40  
41  
42  
43  
44  
45  
46  
47  
48  
49  
50  
51  
52  
53  
54  
55  
56  
57  
58  
59  
60  
group-based trajectory modelling (GBTM) technique was used to estimate SRH trajectories.  
Logistic regression analysis was used to examine the associations between changes in SRH and  
frailty.

14 **Results:** Four SRH trajectory classes were identified across the 8-year follow-up: 232 participants  
15  
16  
17  
18  
19  
20  
21  
22  
23  
24  
25  
26  
27  
28  
29  
30  
31  
32  
33  
34  
35  
36  
37  
38  
39  
40  
41  
42  
43  
44  
45  
46  
47  
48  
49  
50  
51  
52  
53  
54  
55  
56  
57  
58  
59  
60  
(11.9%) were classified into the constantly poor SRH group, 1123 (57.4%) into the constantly fair  
SRH group, 335 (17.1%) into the constantly good SRH group, and 266 (13.4%) into the good-to-  
fair SRH group. After adjusting for gender, age, level of education, income, social participation,  
health behaviors, and major comorbidities, it was found that age, poor income satisfaction, without  
job, and constantly poor SRH were associated with increased risk of frailty, while constantly good  
SRH [OR 0.04, 95% CI (0.01-0.32)] and good-to-fair SRH [OR 0.19, 95% CI (0.06-0.63)] were  
associated with reduced risks of frailty.

22 **Conclusions:** Constantly poor SRH was associated with an increased risk of frailty in older age.

1 1 SRH in older adults should be recognized as a predictive tool for future frailty. Diet and exercise  
2  
3  
4 2 interventions may help to prevent frailty among high-risk older individuals with constantly low  
5  
6  
7 3 SRH.  
8  
9

10 4

11  
12 **Strengths and Limitation of study:**  
13

- 14  
15 6 1. To the best of our knowledge, this is the first long-term study to investigate the relationship  
16  
17  
18 7 between SRH trajectory and frailty in an Asian population based on a nationally representative  
19  
20  
21 8 sample.  
22  
23  
24 9 2. Reporting bias could have occurred because all data were collected through self-reporting and  
25  
26 10 not measured objectively.  
27  
28  
29 11 3. Frailty was defined according to a modified phenotype definition, and assessed using  
30  
31  
32 12 questionnaire data.  
33  
34  
35 13

36  
37 14 **Key words:** self-rated health, frailty, trajectory, older adults  
38  
39  
40 15  
41  
42  
43  
44  
45  
46  
47  
48  
49  
50  
51  
52  
53  
54  
55  
56  
57  
58  
59  
60

## 1 BACKGROUND

2 Aging has become a serious challenge globally in both Western and developed Asian countries.  
3  
4 The World Health Organization defines an aged society as a population in which people over 65  
5  
6 years old comprise more than 14% of the total population. According to the Department of Health  
7  
8 of Taiwan, the proportion of people over 65 in Taiwan increased from 8.6% to 10.7% between  
9  
10 2000 and 2010 [1]. The Department of Development predicts this figure will rise to 20% by 2027  
11  
12 [2], which would represent the fastest rate of aging in the world. Due to the rapidly aging  
13  
14 population, the annual crude mortality rate for Taiwanese citizens over 65 increased from 46.9% to  
15  
16 68.5% between 1981 and 2010 [1, 3].  
17  
18

19  
20  
21  
22  
23  
24  
25  
26  
27  
28  
29  
30  
31  
32  
33  
34  
35  
36  
37  
38  
39  
40  
41  
42  
43  
44  
45  
46  
47  
48  
49  
50  
51  
52  
53  
54  
55  
56  
57  
58  
59  
60

10 Many key indicators can be used to predict the future health of older adults, such as the self-rated  
11 health (SRH) score. SRH refers to a single question, such as, “In general, would you say that your  
12 health is excellent, very good, good, fair, or poor?” [4]. SRH is an assessment and predictor of  
13 health based on an individual’s general condition and subjective feelings about their physical,  
14 psychological, and social well-being, combined with objective measurements of health. Several  
15 studies have demonstrated consistency between SRH and individual health status and have shown  
16 SRH can predict future mortality, disability, and other adverse health outcomes [5-12]. Frailty has  
17 been proven to be one of the most important key indicators of the health of older people in recent  
18 decades. Frailty is a geriatric condition characterized by increased vulnerability and decreased  
19 capacity to maintain homeostasis, and pre-frailty refers to a condition that meets one or two of the  
20 criteria for the Fried frailty phenotype [13]. Frailty in later life has been proven to lead to a number  
21 of adverse health outcomes and a poor quality of life [14-18]. As frailty can be addressed by  
22 proper recognition and treatment, such as diet and exercise, it is important to identify risk factors

1 for frailty in older adults [19]. Several studies have explored the relationship between SRH and  
2 frailty[20-22]. A population-based study of more than 2,000 healthy participants conducted in  
3  
4 Finland by Huohvanainen et al. (2016) found that SRH in midlife could predict frailty, pre-frailty,  
5  
6 and mortality in later life [23]. However, most previous studies were conducted in Western  
7  
8 countries; evidence of the value of SRH for predicting frailty remains scarce for older Asian adults,  
9  
10 especially from long-term observation. The problem with long-term observations of older adults is  
11  
12 that rapid changes in biological function and psychosocial processes occur over time in this  
13  
14 population, and it is not possible to detect these changes using traditional statistical methods. Thus,  
15  
16 the group-based trajectory model (GBTM) was developed, which provides a statistical standard for  
17  
18 establishing the influence of life trajectory [24, 25]. The aim of this study was to explore the long-  
19  
20 term relationships between SRH trajectories and future frailty in older Taiwanese adults using a  
21  
22 national population cohort study.  
23  
24  
25  
26  
27  
28  
29  
30  
31  
32  
33  
34  
35  
36  
37  
38  
39  
40  
41  
42  
43  
44  
45  
46  
47  
48  
49  
50  
51  
52  
53  
54  
55  
56  
57  
58  
59  
60



## 1    1    **METHODS**

### 2    2    *Data sources*

3    3    We retrieved data from the Taiwan Longitudinal Study in Aging (TLSA), a population-based,  
4    4    national representative study initiated by Taiwan's Bureau of Health Promotion, and the  
5    5    University of Michigan's Population Studies Center and Institute of Gerontology in the United  
6    6    States. Data were collected from systematically selected representative samples of the Taiwanese  
7    7    population, including institutionalized older people. In the TLSA, a three-stage systematic random  
8    8    sampling design was used for the selection of an equal probability sample [26]. We believe that the  
9    9    TLSA contains samples that are highly representative of the true population structure under this  
10   10   kind of sampling method. Personal interviews were conducted by highly trained interviewers. To  
11   11   ensure high data quality collection, careful supervision was provided during data collection and  
12   12   data processing was conducted by a professional data entry company.

13   13   The TLSA was started in 1989 and six waves of data collection had been completed by 2007. For  
14   14   this study, we used the 1999 sample, which included 2,130 subjects aged 53–69 years old in 1999.  
15   15   We followed up this cohort for 8 years and used data from 2007 to analyze outcomes. The  
16   16   Population Studies Center at the University of Michigan reviewed the representativeness of the  
17   17   completed sample, and the analysis showed that the sample was highly representative, with a  
18   18   90.6% response rate. Details of the study design have been described elsewhere [27-29].

### 19   19   *Study group identification*

20   20   We analyzed the 1999 sample, which included 2,130 subjects aged 53–69 years old in 1999.  
21   21   Individuals who had developed frailty in 1999 or who had any functional disability in 1999 were  
22   22

1 excluded from the study. A participant was deemed to have functional disability if he or she had  
2  
3  
4 trouble with at least one activity of daily living, including bathing, dressing, eating, getting out of  
5  
6  
7 bed, walking, and using the bathroom [30]. The reason that we excluded people with frailty or  
8  
9  
10 disability at baseline was because both frailty and disability could have substantially affected the  
11  
12  
13 outcome. Thus, 1,956 subjects were included in the final analysis.  
14  
15  
16  
17

## 18 *Research variables*

### 19 *Demographics*

20  
21 For each eligible subject, we gathered data in 1999 on age, gender, level of education, marital  
22  
23  
24 status, income level, social participation, employment status, smoking, alcohol consumption, and  
25  
26  
27 chronic diseases. We gathered SRH data in 1999, 2003, and 2007. Level of education was  
28  
29  
30 classified into four groups: illiterate (0 years), elementary school (1–6 years), junior to senior high  
31  
32  
33 school (7–12 years), and college or above (> 12 years). Income level was determined by asking  
34  
35  
36 individuals how they felt about their income level. The possible answers were *very satisfied*,  
37  
38  
39 *satisfied*, *fair*, *unsatisfied*, and *very unsatisfied*. We classified the income levels as “good ” (rated  
40  
41  
42 *very satisfied*, *satisfied*), “fair” (rated *fair*), or “poor” (*unsatisfied* or *very unsatisfied*).  
43  
44  
45

### 46 *Health factors*

47  
48 SRH was determined by asking individuals how they rated their current health. Possible answers  
49  
50  
51 were *excellent*, *good*, *fair*, *poor*, and *very poor*. We reclassified the individuals into three groups  
52  
53  
54 based on SRH: good (rated *excellent* or *good*), fair (*fair*), or poor (*poor* or *very poor*). We  
55  
56  
57 reclassified SRH from 5 groups to 3 groups so that there were enough participants in each group to  
58  
59  
60 provide sufficient statistical power.

1 Social participation was determined based on whether individuals performed either paid or  
2  
3  
4 2 voluntary work or participated in community activities. The individuals were classified into two  
5  
6  
7 3 groups based on job status in 1999: with a job and without job [31]. Participants were considered  
8  
9  
10 4 to be employed (“With a job”) if they chose the response “ I had a job whether it was fulltime or  
11  
12  
13 5 part-time job” or “I had a job but took a leave temporarily.” Participants were considered to be  
14  
15  
16 6 unemployed (“Without job”) if they chose the response, “I had no job and was looking for a job.”  
17  
18 7 or “I did not do any job.” The number of chronic diseases suffered by each individual was  
19  
20  
21 8 recorded, including hypertension, diabetes, cardiovascular disease, stroke, cancer, chronic  
22  
23  
24 9 respiratory diseases, arthritis or rheumatoid diseases, gastric diseases, hepatobiliary diseases, and  
25  
26  
27 10 kidney diseases. Information about chronic conditions was ascertained by a positive answer to the  
28  
29  
30 11 question, “Have you ever been told by a doctor that you suffer from...”.

### 32 *Outcome*

33  
34  
35 13 Data regarding frailty was collected in 2007 as the outcome measure. Frailty was defined  
36  
37  
38 14 according to the Fried criteria [13]. Individuals who exhibited at least three of five traits (i.e.,  
39  
40  
41 15 weight loss, exhaustion, low physical activity, slowness, and weakness) were considered frail.  
42  
43  
44 16 Individuals meeting only one or two of the five traits of the Fried frailty criteria were regarded as  
45  
46  
47 17 pre-frail. We used substitute evaluations for these five traits because we retrieved data from  
48  
49  
50 18 questionnaires, and this modified frailty definition has been widely used and previously published  
51  
52  
53 19 with validity [32-34]. The parameter “decreased appetite” was used instead of “body weight loss”  
54  
55  
56 20 to represent nutritional status. Hence, participants who reported poor appetite often in the previous  
57  
58  
59 21 week were classified as having the trait “shrinking”. For mobility, we used walking/moving in and  
60  
22 around the house instead of gait speed. Participants who had difficulty or were unable to walk a

1 distance of 200 to 300 m were considered slow. For strength, we used the “lifting heavy groceries”  
2  
3  
4 2 parameter instead of “hand grip strength”. Participants who had difficulty or were unable to carry  
5  
6  
7 3 12 kg of groceries were considered weak. For physical activity, we used the duration of leisure  
8  
9  
10 4 time/physical activities per week instead of the level of physical activity. Participants who did not  
11  
12  
13 5 take a walk, hike or jog, do gardening, or participate in other outdoor activities at least once or  
14  
15  
16 6 twice a week were considered to have low activity. We used the questionnaire of the Center for  
17  
18 7 Epidemiologic Studies Depression Scale (CES-D) to determine the level of energy. Participants  
19  
20  
21 8 who reported, “*I could not get going*” or “*I felt everything I did was an effort*” often or most of the  
22  
23  
24 9 time in the previous week were considered to be exhausted. As nearly all older people approaching  
25  
26  
27 10 end of life have functional disability and frailty, we regarded those who died during the study  
28  
29  
30 11 period as having frailty in our study [35]

### 31 32 33 34 35 13 *Statistical analysis*

36  
37  
38 14 Group-based trajectory modelling (GBTM) was applied to determine the SRH trajectories. GBTM  
39  
40  
41 15 is a finite mixture model and also a semi-parametric model for longitudinal data. We chose this  
42  
43  
44 16 model because it postulates a discrete distribution of the population, which makes it possible to  
45  
46  
47 17 distinguish groups/classes of homogeneous individuals within the population [36]. We used the  
48  
49  
50 18 three groups based on SRH, good (rated *excellent* or *good*), fair (*fair*), or poor (*poor* or *very poor*),  
51  
52  
53 19 as indicators to generate the model and employed the Bayesian Information Criterion to identify  
54  
55  
56 20 the most appropriate model groups[37]. Previous geriatric research studies have used this model  
57  
58  
59 21 [27, 33, 34, 38, 39]. For the descriptive analysis, we used analysis of variance and the chi-square  
60  
22 test to compare continuous and categorical variables, respectively. Logistic regression was used to

1 analyze the relationship between SRH trajectories and frailty, with adjustments for age, gender,  
2  
3  
4 2 level of education, income level, marital status, number of chronic diseases, social participation,  
5  
6  
7 3 smoking, alcohol consumption, and employment status. Statistical significance was set at  $p < 0.05$ .  
8  
9  
10 4 All data were analyzed using SPSS (version 22.0, IBM, Chicago, IL, USA).  
11  
12  
13  
14 5  
15  
16

### 17 6 *Patient and Public Involvement*

18  
19  
20 7 Patients or the public were not involved in the design, or conduct, or reporting of our research.  
21  
22  
23 8 However, the Taiwan Association of Gerontology and Geriatrics, who listens to and represents  
24  
25  
26 9 geriatric patients, will help to disseminate our plans, which are based on our research results.  
27  
28  
29  
30 10  
31  
32  
33  
34  
35  
36  
37  
38  
39  
40  
41  
42  
43  
44  
45  
46  
47  
48  
49  
50  
51  
52  
53  
54  
55  
56  
57  
58  
59  
60

## 1 RESULTS

2 Figure 1 shows the flow chart of this study, including data collection from 1999, 2003, and 2007.

3 Table 1 shows the descriptive data for all subjects. A total of 1,956 subjects with an average age of  
4 61.46 years were included in the final analysis. Most subjects had 1-6 years of education, had a  
5 fair income level, and were married. The average number of chronic diseases was 1.21. After  
6 GBTM was applied, 4 trajectories of SRH were generated from 1999 to 2007 (Figure 2). There  
7 were 232 participants (11.9%) in the constantly poor SRH group, 1123 participants (57.4%) in the  
8 constantly fair SRH group, 335 participants (17.1%) in the constantly good SRH group, and 266  
9 participants (13.6%) in the good-to-fair SRH group. Age distribution, sex, level of education,  
10 income level, social participation, marriage status, alcohol consumption, and job status were  
11 significantly different among the four SRH trajectory classes.

12 Univariate logistic regression of the associations between the demographic and clinical  
13 characteristics and frailty are presented in Table 2. All variables, except for marital status and  
14 smoking behavior, were significantly associated with frailty.

15 Table 3 illustrates the results of the multivariate logistic regression analysis of the relationships  
16 between SRH trajectories and frailty. After adjustments for relevant factors, including age, gender,  
17 level of education, income level, social participation, alcohol consumption behavior, number of  
18 chronic diseases, and job status, logistic regression analysis revealed age, poor income satisfaction,  
19 without job, and constantly poor SRH was associated with an increased risk of frailty [OR 3.091,  
20 95% CI (2.036-4.692) for constantly poor SRH], while constantly good SRH [OR 0.044, 95% CI  
21 (0.006-0.323)] and good-to-fair SRH [OR 0.192, 95% CI (0.059-0.625)] were associated with a  
22 decreased risk of frailty compared to constantly fair SRH.

## DISCUSSION

In this population cohort study, we created a trajectory-based model for 1,956 Taiwanese adults aged 53–69 years old in 1999. Based on their SRH trajectories over the 8-year follow-up, the cohort could be classified into four groups: constantly poor SRH, constantly fair SRH, constantly good SRH, and good-to-fair SRH. Multivariate logistic regression demonstrated an elevated risk of frailty for the constantly poor SRH group. We also observed significant protective effects for the groups with constantly good SRH and good-to-fair SRH.

To the best of our knowledge, this is the first long-term study to investigate the relationship between SRH trajectory and frailty. Our results are consistent with previous studies which investigated SRH at a single time point. Huohvanainen et al. (2016) found that poor SRH in midlife was associated with pre-frailty, frailty, and mortality in later life after 26 years of follow-up in Finland [23]. A short-term study of 22 institutionalized older individuals by Gijzel et al. (2017) found that variance in the SRH score time series was significantly higher in frail participants across physical, mental, and social domains [40]. Baddour et al. (2019) reported that SRH correlated moderately with frailty and found that good-to-excellent SRH was predictive of non-frail status and preservation of activities of daily living (ADL) [41].

We believe this study provides strong evidence of a causal relationship between SRH and frailty.

First, this study was a well-designed cohort study with nationally representative subjects and we excluded those who had disability and frailty at baseline. Second, a significantly elevated risk of frailty was observed in the poor SRH group, even after adjusting for confounding factors related to frailty, including age, gender, level of education, income level, marital status, major disease, health behaviors, social participation, and employment status in the multivariate regression analysis.

1 Third, in the analysis of the relationships between SRH trajectory and frailty, the constantly poor  
2  
3  
4 SRH group had an elevated risk of frailty, and significant protective effects were observed for the  
5  
6  
7 constantly good SRH and good-to-fair SRH groups. Thus, a causal relationship may exist between  
8  
9  
10 SRH and frailty.

11  
12 However, some studies have suggested that in the relationship between SRH and frailty, the  
13  
14  
15 direction of causality may be different. Pinto et al. discovered that self-rated health is a mediator  
16  
17  
18 variable between physical and mental health and life satisfaction [42]. Possibly, low-level daily  
19  
20  
21 activities prevent older adults from participating in community activities, leading to poor  
22  
23  
24 subjective health and life satisfaction. Our study showed that constantly poor SRH would lead to  
25  
26  
27 increased incidence of frailty, and we believe that this causal relationship does exist, because  
28  
29  
30 several studies have identified mechanisms that potentially link SRH to frailty. Dysregulation of  
31  
32  
33 neuroendocrine processes and the immune system may lead to further vulnerability and lower  
34  
35  
36 resistance [43], and previous studies showed that inflammatory responses are related to SRH.  
37  
38  
39 Christian et al. (2011) found that poorer SRH was associated with elevated serum inflammatory  
40  
41  
42 markers, such as IL-6 and CRP, among generally healthy older adults [44]. These inflammatory  
43  
44  
45 markers have been associated with frailty. Low physical activity could also be a factor. Granger et  
46  
47  
48 al. (2017) reported that high levels of physical activity were positively associated with self-rated  
49  
50  
51 'good health' status in European adolescents [45]. Additionally, Savela et al. (2013) found that a  
52  
53  
54 higher level of physical activity from midlife onwards was strongly associated with a lower risk of  
55  
56  
57 frailty in old age [46]. Further investigation is warranted to explore this intervention for the  
58  
59  
60 prevention of frailty in people whose SRH is poor, and to evaluate its cost-effectiveness.



## *Strengths and Limitations*

This study has several strengths. First, this eight-year retrospective cohort study was based on a nationally representative sample with extremely high survey response rates. The database contained data from a large, randomly selected population; thus, the external validity is high. Second, our analysis of SRH trajectory as a predictor of frailty strengthens the evidence of a causal relationship between SRH and frailty. Moreover, the study design included a trajectory-based model analysis, which minimized the possibility of misclassification bias, as SRH can change over time. Third, we adjusted for numerous confounding factors, including age, gender, level of education, income level, marital status, major disease, health behaviors, social participation, and job status.

However, this study also has several limitations. First, all data were collected through self-reporting and were not measured objectively, which could have resulted in reporting bias. Additionally, proxy respondents completed the follow-up questionnaire for subjects who were severely ill, which possibly generated reporting bias. Second, the associations between SRH and frailty could be bi-directional. For example, a subject may experience poor SRH due to frailty. However, we attempted to address this issue by using a longitudinal study design and excluding people with frailty and/or disability at baseline, as frailty and/or disability could substantially affect the outcome. The design of this study also helped to eliminate the possibility of reverse causality. We also adjusted for a number of major chronic diseases to reduce the influence of bias. Third, when GBTM was applied, differences between subgroups could be determined, but not differences within subgroups. This was because in GBTM it was assumed that all individuals in a trajectory class had the same behavior [47]. Thus, different trajectory modelling techniques could

1 be applied to examine any differences in a specific SRH trajectory in future research. Fourth, we  
2  
3  
4 used subjective assessment for variables such as self-rated health or income level, and these  
5  
6  
7 measurements could therefore have been influenced by mood states such as depression [48] or  
8  
9  
10 poor cognitive function, which may occur in certain diseases, such as dementia. Thus, further  
11  
12  
13 study is warranted to explore the relationships among SRH, depression, dementia, and frailty. Fifth,  
14  
15  
16 interaction effects may have affected the results. For example, women have consistently reported  
17  
18  
19 poorer SRH compared to men in previous studies. Future research should take this issue into  
20  
21  
22 consideration. Lastly, survival bias could have occurred due to multiple subjects being lost to  
23  
24  
25  
26  
27  
28  
29  
30  
31  
32  
33  
34  
35  
36  
37  
38  
39  
40  
41  
42  
43  
44  
45  
46  
47  
48  
49  
50  
51  
52  
53  
54  
55  
56  
57  
58  
59  
60

## CONCLUSION

Poor SRH in older adults was associated with a higher risk of developing frailty, and constantly poor SRH appeared to confer a greater risk of frailty in older adults. Moreover, maintaining stable, good SRH may help to prevent frailty in later life. Thus, we suggest that policymakers design and implement programs to regularly screen SRH in older adults. Further studies are necessary to define practical strategies for reducing the risk of disability and death among older adults with constantly poor SRH, thereby improving the quality of life of older people.

**FIGURE****Figure 1.** Flow chart of the study design

Flow chart showing the patient inclusion and exclusion processes, and the process of group-based trajectory analysis. SRH, self-rated health.

**Figure 2.** Trajectories of Self-Rated Health score between 1999 and 2007

After group-based trajectory analysis, there were 232 participants (11.9%, group 1) in the constant poor SRH group, 1123 participants (57.4%, group 2) in the constant fair SRH group, 335 participants (17.1%, group 3) in the constant good SRH group, and 266 participants (13.6%, group 4) in the good-to-fair SRH group.

1 **ABBREVIATIONS**  
2  
3

4 SRH Self-rated Health  
5

6  
7 TLSA Taiwan Longitudinal Study on Aging  
8

9  
10 CES-D Center for Epidemiologic Studies Depression Scale  
11

12  
13 ADL Activities of Daily Living  
14  
15  
16  
17  
18  
19  
20  
21  
22  
23  
24  
25  
26  
27  
28  
29  
30  
31  
32  
33  
34  
35  
36  
37  
38  
39  
40  
41  
42  
43  
44  
45  
46  
47  
48  
49  
50  
51  
52  
53  
54  
55  
56  
57  
58  
59  
60

For peer review only

## DECLARATIONS

### Ethics approval and consent to participate

The current study was approved by the Institutional Review Board of Health Promotion Administration, Ministry of Health and Welfare (Approval no. BHP-2007-002). Before recruitment, all participants received a proper explanation about the study and provided consent for inclusion in the study. Participants who could read and write signed the written consent documents; those who could not read nor write used a name chop or handprint [thumb print? fingerprint?] with the assistance of their family members. In addition, a legal guardian/representative provided consent on behalf of participants with cognitive decline or stroke.

### Consent for publication

Not applicable.

### Availability of data and materials

The datasets used and analyzed during the current study are not publicly available, but are available from the corresponding author on reasonable request with the permission of the Ministry of Health and Welfare, Taiwan.

### Competing interests

The authors declare no conflicts of interests.

### Funding

1 This work was supported by the Ministry of Health and Welfare, Taiwan (Grant number:  
2  
3  
4 M06M2346 awarded to M.-C.L.).  
5  
6  
7  
8  
9

### 10 **Author Contributions**

11  
12 The individual contributions of all authors: Meng-Chih Lee conceived of the study and supervised  
13  
14 all aspects of its implementation. Wei-Min Chu completed the analyses and drafted the content.  
15  
16 Yu-han Hsiao, Shu-Hsin Lee, and Pi-Shan Hsu assisted with the study design and revised the  
17  
18 content. Hsin-En Ho and Chih-Jung Yeh assisted with the statistical analysis and revised the  
19  
20 content. All authors helped to conceptualize ideas, interpret findings, and review drafts of the  
21  
22 manuscript.  
23  
24  
25  
26  
27  
28  
29  
30  
31

### 32 **Acknowledgements**

33  
34 We thank our colleagues from Chung Shan Medical University, Taichung, Taiwan for assisting  
35  
36 with the statistical analysis. The sponsor had no role in the design, methods, subject recruitment,  
37  
38 data collection, analysis, or preparation of paper.  
39  
40  
41  
42  
43  
44  
45  
46  
47  
48  
49  
50  
51  
52  
53  
54  
55  
56  
57  
58  
59  
60

1  
2  
3  
4  
5  
6  
7  
8  
9  
10  
11  
12  
13  
14  
15  
16  
17  
18  
19  
20  
21  
22  
23  
24  
25  
26  
27  
28  
29  
30  
31  
32  
33  
34  
35  
36  
37  
38  
39  
40  
41  
42  
43  
44  
45  
46  
47  
48  
49  
50  
51  
52  
53  
54  
55  
56  
57  
58  
59  
60  
**REFERENCES**

1. Department of Health EY T: **Taiwan public health report 2017**. 2018.
2. National Development Council T: **Population projections for Taiwan: 2018-2065**. 2018.
3. Department of Health EY T: **The statistical analysis of mortality in 2010**. 2011.
4. Idler EL, Benyamini Y: **Self-rated health and mortality: a review of twenty-seven community studies**. *Journal of health and social behavior* 1997, **38**(1):21-37.
5. Wu S, Wang R, Zhao Y, Ma X, Wu M, Yan X, He J: **The relationship between self-rated health and objective health status: a population-based study**. *BMC public health* 2013, **13**:320.
6. Bopp M, Braun J, Gutzwiller F, Faeh D: **Health risk or resource? Gradual and independent association between self-rated health and mortality persists over 30 years**. *PloS one* 2012, **7**(2):e30795.
7. Giltay EJ, Volllaard AM, Kromhout D: **Self-rated health and physician-rated health as independent predictors of mortality in elderly men**. *Age and ageing* 2012, **41**(2):165-171.
8. Halford C, Wallman T, Welin L, Rosengren A, Bardel A, Johansson S, Eriksson H, Palmer E, Wilhelmsen L, Svardsudd K: **Effects of self-rated health on sick leave, disability pension, hospital admissions and mortality. A population-based longitudinal study of nearly 15,000 observations among Swedish women and men**. *BMC public health* 2012, **12**:1103.
9. Jylha M: **What is self-rated health and why does it predict mortality? Towards a unified conceptual model**. *Social science & medicine (1982)* 2009, **69**(3):307-316.



- 1  
2  
3  
4  
5  
6  
7  
8  
9  
10  
11  
12  
13  
14  
15  
16  
17  
18  
19  
20  
21  
22  
23  
24  
25  
26  
27  
28  
29  
30  
31  
32  
33  
34  
35  
36  
37  
38  
39  
40  
41  
42  
43  
44  
45  
46  
47  
48  
49  
50  
51  
52  
53  
54  
55  
56  
57  
58  
59  
60
10. Mavaddat N, Kinmonth AL, Sanderson S, Surtees P, Bingham S, Khaw KT: **What determines Self-Rated Health (SRH)? A cross-sectional study of SF-36 health domains in the EPIC-Norfolk cohort.** *Journal of epidemiology and community health* 2011, **65**(9):800-806.
11. Sargent-Cox KA, Anstey KJ, Luszcz MA: **The choice of self-rated health measures matter when predicting mortality: evidence from 10 years follow-up of the Australian longitudinal study of ageing.** *BMC geriatrics* 2010, **10**:18.
12. Stenholm S, Pentti J, Kawachi I, Westerlund H, Kivimaki M, Vahtera J: **Self-rated health in the last 12 years of life compared to matched surviving controls: the Health and Retirement Study.** *PloS one* 2014, **9**(9):e107879.
13. Fried LP, Tangen CM, Walston J, Newman AB, Hirsch C, Gottdiener J, Seeman T, Tracy R, Kop WJ, Burke G *et al*: **Frailty in older adults: evidence for a phenotype.** *The journals of gerontology Series A, Biological sciences and medical sciences* 2001, **56**(3):M146-156.
14. Bartley MM, Geda YE, Christianson TJ, Pankratz VS, Roberts RO, Petersen RC: **Frailty and Mortality Outcomes in Cognitively Normal Older People: Sex Differences in a Population-Based Study.** *Journal of the American Geriatrics Society* 2016, **64**(1):132-137.
15. At J, Bryce R, Prina M, Acosta D, Ferri CP, Guerra M, Huang Y, Rodriguez JJ, Salas A, Sosa AL *et al*: **Frailty and the prediction of dependence and mortality in low- and middle-income countries: a 10/66 population-based cohort study.** *BMC medicine* 2015, **13**:138.
16. Lin SY, Lee WJ, Chou MY, Peng LN, Chiou ST, Chen LK: **Frailty Index Predicts All-Cause**

- 1 **Mortality for Middle-Aged and Older Taiwanese: Implications for Active-Aging Programs.**  
2  
3  
4 *PloS one* 2016, **11**(8):e0161456.  
5  
6
- 7 17. Kulmala J, Nykanen I, Hartikainen S: **Frailty as a predictor of all-cause mortality in older**  
8 **men and women.** *Geriatrics & gerontology international* 2014, **14**(4):899-905.  
9  
10  
11  
12
- 13 18. Vermeiren S, Vella-Azzopardi R, Beckwee D, Habbig AK, Scafoglieri A, Jansen B, Bautmans I:  
14 **Frailty and the Prediction of Negative Health Outcomes: A Meta-Analysis.** *Journal of the*  
15 *American Medical Directors Association* 2016, **17**(12):1163.e1161-1163.e1117.  
16  
17  
18  
19  
20  
21
- 22 19. Walston J, Buta B, Xue QL: **Frailty Screening and Interventions: Considerations for**  
23 **Clinical Practice.** *Clinics in geriatric medicine* 2018, **34**(1):25-38.  
24  
25  
26  
27
- 28 20. Franse CB, van Grieken A, Qin L, Melis RJF, Rietjens JAC, Raat H: **Socioeconomic**  
29 **inequalities in frailty and frailty components among community-dwelling older citizens.**  
30  
31  
32  
33  
34 *PloS one* 2017, **12**(11):e0187946.  
35  
36
- 37 21. Lau BH, Kwan J, Cheung KS: **Overlap of Frailty, Comorbidity, Disability, and Poor Self-**  
38 **Rated Health in Community-Dwelling Near-Centenarians and Centenarians.** *Journal of*  
39 *the American Geriatrics Society* 2016, **64**(4):900-901.  
40  
41  
42  
43  
44
- 45 22. Obaidi MA, Giri S, Mir N, Kenzik K, McDonald AM, Smith CY, Gbolahan OB, Paluri RK,  
46  
47  
48  
49  
50  
51  
52  
53  
54  
55  
56  
57  
58  
59  
60
23. Huohvanainen E, Strandberg AY, Stenholm S, Pitkala KH, Tilvis RS, Strandberg TE:

- 1  
2  
3  
4  
5  
6  
7  
8  
9
- Association of Self-Rated Health in Midlife With Mortality and Old Age Frailty: A 26-Year Follow-Up of Initially Healthy Men.** *The journals of gerontology Series A, Biological sciences and medical sciences* 2016, **71**(7):923-928.
- 10  
11  
12  
13  
14  
15  
16  
17  
18
24. Lee J, Cho SI, Chun H, Jung-Choi K, Kang M, Jang SN: **Life course indices for social determinants of self-rated health trajectory in Korean elderly.** *Archives of gerontology and geriatrics* 2017, **70**:186-194.
- 19  
20  
21  
22  
23  
24  
25  
26  
27
25. Nagin DS, Odgers CL: **Group-based trajectory modeling in clinical research.** *Annu Rev Clin Psychol.* 2010, **6**:109-38.
- 28  
29  
30  
31  
32  
33  
34  
35  
36  
37  
38  
39  
40  
41  
42
26. Tai CJ, Chen JH, Tseng TG, Lin YT, Hsiao YH, Lee MC, Yang YH: **Prediction of Frailty and Dementia Using Oral Health Impact Profile from a Population-Based Survey.** *International journal of environmental research and public health* 2020, **17**(6).
- 43  
44  
45  
46  
47  
48  
49  
50  
51  
52  
53  
54  
55  
56  
57  
58  
59  
60
27. Liang J, Wang CN, Xu X, Hsu HC, Lin HS, Lin YH: **Trajectory of functional status among older Taiwanese: Gender and age variations.** *Social science & medicine (1982)* 2010, **71**(6):1208-1217.
28. Pu C, Tang GJ, Huang N, Chou YJ: **Predictive power of self-rated health for subsequent mortality risk during old age: analysis of data from a nationally representative survey of elderly adults in Taiwan.** *J Epidemiol* 2011, **21**(4):278-284.
29. Martin LG, Zimmer Z, Hurng BS: **Trends in late-life disability in Taiwan, 1989-2007: the roles of education, environment, and technology.** *Popul Stud (Camb)* 2011, **65**(3):289-304.

- 1  
2  
3  
4  
5  
6  
7  
8  
9  
10  
11  
12  
13  
14  
15  
16  
17  
18  
19  
20  
21  
22  
23  
24  
25  
26  
27  
28  
29  
30  
31  
32  
33  
34  
35  
36  
37  
38  
39  
40  
41  
42  
43  
44  
45  
46  
47  
48  
49  
50  
51  
52  
53  
54  
55  
56  
57  
58  
59  
60
30. Katz S, Ford AB, Moskowitz RW, Jackson BA, Jaffe MW: **STUDIES OF ILLNESS IN THE AGED. THE INDEX OF ADL: A STANDARDIZED MEASURE OF BIOLOGICAL AND PSYCHOSOCIAL FUNCTION.** *JAMA* 1963, **185**:914-919.
31. Chu WM, Ho HE, Yeh CJ, Tsan YT, Lee SH, Lee MC: **Late-career unemployment and risk of frailty among older adults in Taiwan: An 8-year population-based cohort study.** *Geriatrics & gerontology international* 2021, **21**(4):353-358.
32. de Vries NM, Staal JB, van Ravensberg CD, Hobbelen JS, Olde Rikkert MG, Nijhuis-van der Sanden MW: **Outcome instruments to measure frailty: a systematic review.** *Ageing research reviews* 2011, **10**(1):104-114.
33. Hsu HC, Chang WC: **Trajectories of frailty and related factors of the older people in Taiwan.** *Experimental aging research* 2015, **41**(1):104-114.
34. Ho HE, Yeh CJ, Chu WM, Lee MC: **Midlife Body Mass Index Trajectory and Risk of Frailty 8 Years Later in Taiwan.** *The journal of nutrition, health & aging* 2019, **23**(9):849-855.
35. Covinsky KE, Eng C, Lui LY, Sands LP, Yaffe K: **The last 2 years of life: functional trajectories of frail older people.** *Journal of the American Geriatrics Society* 2003, **51**(4):492-498.
36. Nguena Nguetack HL, Pagé MG, Katz J, Choinière M, Vanasse A, Dorais M, Samb OM, Lacasse A: **Trajectory Modelling Techniques Useful to Epidemiological Research: A Comparative Narrative Review of Approaches.** *Clinical epidemiology* 2020, **12**:1205-1222.
37. Nagin DS, Odgers CL: **Group-based trajectory modeling in clinical research.** *Annual review*

- 1  
2  
3  
4  
5  
6  
7  
8  
9  
10  
11  
12  
13  
14  
15  
16  
17  
18  
19  
20  
21  
22  
23  
24  
25  
26  
27  
28  
29  
30  
31  
32  
33  
34  
35  
36  
37  
38  
39  
40  
41  
42  
43  
44  
45  
46  
47  
48  
49  
50  
51  
52  
53  
54  
55  
56  
57  
58  
59  
60
- of clinical psychology* 2010, **6**:109-138.
38. Dhana K, van Rosmalen J, Vistisen D, Ikram MA, Hofman A, Franco OH, Kavousi M:  
**Trajectories of body mass index before the diagnosis of cardiovascular disease: a latent class trajectory analysis.** *European journal of epidemiology* 2016, **31**(6):583-592.
39. Murayama H, Liang J, Bennett JM, Shaw BA, Botosaneanu A, Kobayashi E, Fukaya T, Shinkai S:  
**Trajectories of Body Mass Index and Their Associations With Mortality Among Older Japanese: Do They Differ From Those of Western Populations?** *American journal of epidemiology* 2015, **182**(7):597-605.
40. Gijzel SMW, van de Leemput IA, Scheffer M, Roppolo M, Olde Rikkert MGM, Melis RJF:  
**Dynamical Resilience Indicators in Time Series of Self-Rated Health Correspond to Frailty Levels in Older Adults.** *The journals of gerontology Series A, Biological sciences and medical sciences* 2017, **72**(7):991-996.
41. Baddour NA, Robinson-Cohen C, Lipworth L, Bian A, Stewart TG, Jhamb M, Siew ED, Abdel-Kader K:  
**The Surprise Question and Self-Rated Health Are Useful Screens for Frailty and Disability in Older Adults with Chronic Kidney Disease.** *Journal of palliative medicine* 2019, **22**(12):1522-1529.
42. Pinto JM, Fontaine AM, Neri AL:  
**The influence of physical and mental health on life satisfaction is mediated by self-rated health: A study with Brazilian elderly.** *Archives of gerontology and geriatrics* 2016, **65**:104-110.
43. Lutgendorf SK, Costanzo ES:  
**Psychoneuroimmunology and health psychology: an**

- 1 **integrative model. *Brain, behavior, and immunity* 2003, **17**(4):225-232.**  
2  
3
- 4 44. Christian LM, Glaser R, Porter K, Malarkey WB, Beversdorf D, Kiecolt-Glaser JK: **Poorer**  
5  
6 **self-rated health is associated with elevated inflammatory markers among older adults.**  
7  
8 *Psychoneuroendocrinology* 2011, **36**(10):1495-1504.  
9  
10
- 11  
12  
13 45. Granger E, Williams G, Di Nardo F, Harrison A, Verma A: **The relationship between**  
14  
15 **physical activity and self-rated health status in European adolescents: Results of the**  
16  
17 **EURO-URHIS 2 survey. *European journal of public health* 2017, **27**(suppl\_2):107-111.**  
18  
19
- 20  
21  
22 46. Savela SL, Koistinen P, Stenholm S, Tilvis RS, Strandberg AY, Pitkala KH, Salomaa VV,  
23  
24 Strandberg TE: **Leisure-time physical activity in midlife is related to old age frailty. *The***  
25  
26 *journals of gerontology Series A, Biological sciences and medical sciences* 2013,  
27  
28 **68**(11):1433-1438.  
29  
30
- 31  
32  
33 47. Muthén B, Muthén LK: **Integrating person-centered and variable-centered analyses:**  
34  
35 **growth mixture modeling with latent trajectory classes. *Alcoholism, clinical and***  
36  
37 *experimental research* 2000, **24**(6):882-891.  
38  
39
- 40  
41  
42 48. Chu WM, Liao WC, Li CR, Lee SH, Tang YJ, Ho HE, Lee MC: **Late-career unemployment and**  
43  
44 **all-cause mortality, functional disability and depression among the older adults in**  
45  
46 **Taiwan: A 12-year population-based cohort study. *Archives of gerontology and geriatrics***  
47  
48 **2016, **65**:192-198.**  
49  
50  
51  
52  
53  
54  
55  
56  
57  
58  
59  
60

## TABLES

Table 1. Demographic and clinical characteristics of the participants grouped by SRH trajectories

| Characteristics    | SRH Trajectory  |                  |                   |                  |                  | P value  |
|--------------------|-----------------|------------------|-------------------|------------------|------------------|----------|
|                    | Total<br>n=1956 | Group 1<br>n=232 | Group 2<br>n=1123 | Group 3<br>n=335 | Group 4<br>n=266 |          |
| Age                | 61.46(4.8)      | 62.42(4.5)       | 61.56(4.8)        | 60.75(4.8)       | 61.11(4.9)       | 0.0003*  |
| Sex                |                 |                  |                   |                  |                  | <0.0001* |
| Male               | 1025(52.4%)     | 104(44.8%)       | 547(48.7%)        | 210(62.7%)       | 164(61.65%)      |          |
| Female             | 931(47.6%)      | 128(55.2%)       | 576(51.3%)        | 125(37.3%)       | 102(38.35%)      |          |
| Level of education |                 |                  |                   |                  |                  | <0.0001* |
| illiterate         | 473(24.18%)     | 82(35.3%)        | 301(26.8%)        | 41(12.2%)        | 49(18.4%)        |          |
| 1~6 yrs            | 987(50.46%)     | 120(51.7%)       | 573(51%)          | 164(49%)         | 130(48.9%)       |          |
| 7~12 yrs           | 374(19.12%)     | 26(11.2%)        | 191(17%)          | 93(27.8%)        | 64(24.1%)        |          |

|    |                      |         |              |            |            |            |            |          |
|----|----------------------|---------|--------------|------------|------------|------------|------------|----------|
| 1  |                      | >12 yrs | 122(6.24%)   | 4(1.7%)    | 58(5.2%)   | 37(11%)    | 23(8.7%)   |          |
| 2  |                      |         |              |            |            |            |            |          |
| 3  |                      |         |              |            |            |            |            |          |
| 4  | Income               |         |              |            |            |            |            | <0.0001* |
| 5  |                      |         |              |            |            |            |            |          |
| 6  |                      | Poor    | 416(21.81%)  | 76(33.9%)  | 246(22.5%) | 43(13.1%)  | 51(19.8%)  |          |
| 7  |                      |         |              |            |            |            |            |          |
| 8  |                      | Fair    | 860(45.1%)   | 102(45.5%) | 513(46.8%) | 143(43.5%) | 102(39.5%) |          |
| 9  |                      |         |              |            |            |            |            |          |
| 10 |                      | Good    | 631(33.09%)  | 46(20.5%)  | 337(30.8%) | 143(43.5%) | 105(40.7%) |          |
| 11 |                      |         |              |            |            |            |            |          |
| 12 | Social participation |         |              |            |            |            |            | 0.0003*  |
| 13 |                      |         |              |            |            |            |            |          |
| 14 |                      | No      | 475(24.28%)  | 61(26.3%)  | 305(27.2%) | 56(16.7%)  | 53(19.9%)  |          |
| 15 |                      |         |              |            |            |            |            |          |
| 16 |                      | Yes     | 1481(75.72%) | 171(73.7%) | 818(72.8%) | 279(83.3%) | 213(80.1%) |          |
| 17 |                      |         |              |            |            |            |            |          |
| 18 | Marriage             |         |              |            |            |            |            | 0.0316*  |
| 19 |                      |         |              |            |            |            |            |          |
| 20 |                      | No      | 356(18.2%)   | 46(19.8%)  | 215(19.2%) | 42(12.5%)  | 53(19.9%)  |          |
| 21 |                      |         |              |            |            |            |            |          |
| 22 |                      | Yes     | 1600(81.8%)  | 186(80.2%) | 908(80.9%) | 293(87.5%) | 213(80.1%) |          |
| 23 |                      |         |              |            |            |            |            |          |
| 24 | Smoking              |         |              |            |            |            |            | 0.0876*  |
| 25 |                      |         |              |            |            |            |            |          |
| 26 |                      | No      | 1415(72.34%) | 173(74.6%) | 826(73.6%) | 240(71.6%) | 176(66.2%) |          |
| 27 |                      |         |              |            |            |            |            |          |
| 28 |                      | Yes     | 541(27.66%)  | 59(25.4%)  | 297(26.5%) | 95(28.4%)  | 90(33.8%)  |          |
| 29 |                      |         |              |            |            |            |            |          |
| 30 |                      |         |              |            |            |            |            |          |
| 31 |                      |         |              |            |            |            |            |          |
| 32 |                      |         |              |            |            |            |            |          |
| 33 |                      |         |              |            |            |            |            |          |
| 34 |                      |         |              |            |            |            |            |          |
| 35 |                      |         |              |            |            |            |            |          |
| 36 |                      |         |              |            |            |            |            |          |
| 37 |                      |         |              |            |            |            |            |          |
| 38 |                      |         |              |            |            |            |            |          |
| 39 |                      |         |              |            |            |            |            |          |
| 40 |                      |         |              |            |            |            |            |          |
| 41 |                      |         |              |            |            |            |            |          |
| 42 |                      |         |              |            |            |            |            |          |
| 43 |                      |         |              |            |            |            |            |          |
| 44 |                      |         |              |            |            |            |            |          |
| 45 |                      |         |              |            |            |            |            |          |
| 46 |                      |         |              |            |            |            |            |          |



|    |                    |              |            |            |            |            |          |
|----|--------------------|--------------|------------|------------|------------|------------|----------|
| 1  | Alcohol            |              |            |            |            |            |          |
| 2  |                    |              |            |            |            |            |          |
| 3  |                    |              |            |            |            |            | <0.0001* |
| 4  | consumption        |              |            |            |            |            |          |
| 5  |                    |              |            |            |            |            |          |
| 6  |                    |              |            |            |            |            |          |
| 7  | No                 | 1361(69.62%) | 181(78.4%) | 817(72.8%) | 204(60.9%) | 159(59.8%) |          |
| 8  |                    |              |            |            |            |            |          |
| 9  | Yes                | 594(30.38%)  | 50(21.7%)  | 306(27.3%) | 131(39.1%) | 107(40.2%) |          |
| 10 |                    |              |            |            |            |            |          |
| 11 |                    |              |            |            |            |            |          |
| 12 | Without job        |              |            |            |            |            | <0.0001* |
| 13 |                    |              |            |            |            |            |          |
| 14 |                    |              |            |            |            |            |          |
| 15 | No                 | 816(41.82%)  | 75(32.6%)  | 431(38.5%) | 178(53.1%) | 132(49.6%) |          |
| 16 |                    |              |            |            |            |            |          |
| 17 | Yes                | 1135(58.18%) | 155(67.4%) | 689(61.5%) | 157(46.9%) | 134(50.4%) |          |
| 18 |                    |              |            |            |            |            |          |
| 19 |                    |              |            |            |            |            |          |
| 20 |                    |              |            |            |            |            |          |
| 21 | Number of diseases | 1.21(1.29)   | 1.92(1.55) | 1.35(1.31) | 0.63(0.92) | 0.74(0.89) | <0.0001* |
| 22 |                    |              |            |            |            |            |          |
| 23 |                    |              |            |            |            |            |          |

Notes. Data in tables are numbers(%) for categorical variables and means (SD) for continuous variables. Group

1 refers to constant poor SRH group; Group 2 refers to constant fair SRH group; Group 3 refers to constant good SRH group; Group 4 refers to good-to-fair SRH group

\* P<0.05

Table 2. Univariate logistic regression of demographic and clinical characteristics predicting frailty

|                     |            | Frailty |           |         |
|---------------------|------------|---------|-----------|---------|
|                     |            | OR      | 95%CI     | P value |
| Age                 |            | 1.12*   | 1.08-1.16 | <.0001  |
| Sex                 |            |         |           |         |
|                     | Male       | Ref     |           | <.0001  |
|                     | Female     | 2.06*   | 1.44-2.95 |         |
| Level of education  |            |         |           |         |
|                     | illiterate | Ref     |           |         |
|                     | 1~6 years  | 0.57*   | 0.38-0.81 | 0.0019  |
|                     | 7~12 years | 0.24*   | 0.13-0.46 | <0.0001 |
|                     | >12 years  | 0.06*   | 0.01-0.42 | 0.005   |
| Income satisfaction |            |         |           |         |
|                     | Good       | Ref     |           |         |

|    |                      |      |       |           |         |
|----|----------------------|------|-------|-----------|---------|
| 1  |                      | Fair | 1.41  | 0.91-2.18 | 0.1259  |
| 2  |                      |      |       |           |         |
| 3  |                      |      |       |           |         |
| 4  |                      | Poor | 2.32* | 1.45-3.73 | 0.0005  |
| 5  |                      |      |       |           |         |
| 6  |                      |      |       |           |         |
| 7  | Social participation |      |       |           |         |
| 8  |                      |      |       |           |         |
| 9  |                      | Yes  | 0.64* | 0.44-0.93 | <0.0001 |
| 10 |                      |      |       |           |         |
| 11 |                      | No   | Ref   |           |         |
| 12 |                      |      |       |           |         |
| 13 |                      |      |       |           |         |
| 14 |                      |      |       |           |         |
| 15 | Marriage             |      |       |           |         |
| 16 |                      |      |       |           |         |
| 17 |                      | Yes  | Ref   |           |         |
| 18 |                      |      |       |           |         |
| 19 |                      | No   | 1.28  | 0.83-1.96 | 0.2665  |
| 20 |                      |      |       |           |         |
| 21 |                      |      |       |           |         |
| 22 |                      |      |       |           |         |
| 23 | Smoking              |      |       |           |         |
| 24 |                      |      |       |           |         |
| 25 |                      | Yes  | 0.7   | 0.46-1.07 | 0.0991  |
| 26 |                      |      |       |           |         |
| 27 |                      | No   | Ref   |           |         |
| 28 |                      |      |       |           |         |
| 29 |                      |      |       |           |         |
| 30 |                      |      |       |           |         |
| 31 | Alcohol consumption  |      |       |           |         |
| 32 |                      |      |       |           |         |
| 33 |                      |      |       |           |         |
| 34 |                      | Yes  | 0.57* | 0.37-0.86 | 0.0082  |
| 35 |                      |      |       |           |         |
| 36 |                      | No   | Ref   |           |         |
| 37 |                      |      |       |           |         |
| 38 |                      |      |       |           |         |
| 39 |                      |      |       |           |         |
| 40 |                      |      |       |           |         |

1 Without job

2  
3  
4 Yes 2.89\* 1.91-4.36 <0.0001

5  
6  
7 No Ref

8  
9 Self-Rated Health

10  
11  
12 Good 0.17\* 0.17-0.27 <0.0001

13  
14 Fair 0.43 0.29-0.64 <0.0001

15  
16  
17 Poor Ref

18  
19  
20 Number of diseases

21 1.41\* 1.25-1.59 <.0001

22  
23  
24 \* P<0.05

Table 3. Multivariate logistic regression of SRH trajectories predicting frailty

|                     |            | Frailty |           |         |
|---------------------|------------|---------|-----------|---------|
|                     |            | OR      | 95%CI     | P value |
| Age                 |            | 1.10*   | 1.06-1.16 | <.0001  |
| Sex                 |            |         |           |         |
|                     | Male       | Ref     |           |         |
|                     | Female     | 1.29*   | 0.81-2.05 | 0.2803  |
| Level of education  |            |         |           |         |
|                     | illiterate | Ref     |           |         |
|                     | 1~6 years  | 0.79    | 0.52-1.21 | 0.2811  |
|                     | 7~12 years | 0.49    | 0.24-1.08 | 0.0523  |
|                     | >12 years  | 0.16    | 0.02-1.43 | 0.1058  |
| Income satisfaction |            |         |           |         |
|                     | Good       | Ref     |           |         |

|    |                              |         |       |           |        |
|----|------------------------------|---------|-------|-----------|--------|
| 1  |                              | Fair    | 1.04  | 0.65-1.67 | 0.8746 |
| 2  |                              |         |       |           |        |
| 3  |                              |         |       |           |        |
| 4  |                              | Poor    | 1.73* | 1.02-2.93 | 0.0413 |
| 5  |                              |         |       |           |        |
| 6  |                              |         |       |           |        |
| 7  | Social Participation         |         |       |           |        |
| 8  |                              |         |       |           |        |
| 9  |                              | Yes     | 1.30  | 0.83-2.02 | 0.2558 |
| 10 |                              |         |       |           |        |
| 11 |                              | No      | Ref   |           |        |
| 12 |                              |         |       |           |        |
| 13 |                              |         |       |           |        |
| 14 |                              |         |       |           |        |
| 15 | Alcohol consumption          |         |       |           |        |
| 16 |                              |         |       |           |        |
| 17 |                              | Yes     | 1.06  | 0.63-1.76 | 0.8382 |
| 18 |                              |         |       |           |        |
| 19 |                              | No      | Ref   |           |        |
| 20 |                              |         |       |           |        |
| 21 |                              |         |       |           |        |
| 22 |                              |         |       |           |        |
| 23 | Without job                  |         |       |           |        |
| 24 |                              |         |       |           |        |
| 25 |                              | Yes     | 2.00* | 1.22-3.27 | 0.0059 |
| 26 |                              |         |       |           |        |
| 27 |                              | No      | Ref   |           |        |
| 28 |                              |         |       |           |        |
| 29 |                              |         |       |           |        |
| 30 |                              |         |       |           |        |
| 31 |                              |         |       |           |        |
| 32 | Self-Rated Health trajectory |         |       |           |        |
| 33 |                              |         |       |           |        |
| 34 |                              | Group 1 | 3.09* | 2.04-4.69 | <.0001 |
| 35 |                              |         |       |           |        |
| 36 |                              | Group 2 | Ref   |           |        |
| 37 |                              |         |       |           |        |
| 38 |                              |         |       |           |        |
| 39 |                              |         |       |           |        |
| 40 |                              |         |       |           |        |
| 41 |                              |         |       |           |        |
| 42 |                              |         |       |           |        |
| 43 |                              |         |       |           |        |
| 44 |                              |         |       |           |        |
| 45 |                              |         |       |           |        |
| 46 |                              |         |       |           |        |

|   |                    |         |       |           |        |
|---|--------------------|---------|-------|-----------|--------|
| 1 |                    | Group 3 | 0.04* | 0.01-0.32 | 0.0021 |
| 2 |                    |         |       |           |        |
| 3 |                    |         |       |           |        |
| 4 |                    | Group 4 | 0.19* | 0.06-0.63 | 0.0061 |
| 5 |                    |         |       |           |        |
| 6 |                    |         |       |           |        |
| 7 | Number of diseases |         | 1.10  | 0.96-1.27 | 0.1645 |
| 8 |                    |         |       |           |        |
| 9 |                    |         |       |           |        |

10 Notes. Group 1 refers to constantly poor SRH group; Group 2 refers to constantly fair SRH group; Group 3 refers to constantly good SRH group;

11  
12 Group 4 refers to good-to-fair SRH group

13  
14  
15 \* P<0.05

1  
2  
3  
4  
5  
6  
7  
8  
9  
10  
11  
12  
13  
14  
15  
16  
17  
18  
19  
20  
21  
22  
23  
24  
25  
26  
27  
28  
29  
30  
31  
32  
33  
34  
35  
36  
37  
38  
39  
40  
41  
42  
43  
44  
45  
46  
47  
48  
49  
50  
51  
52  
53  
54  
55  
56  
57  
58  
59  
60

For peer review only



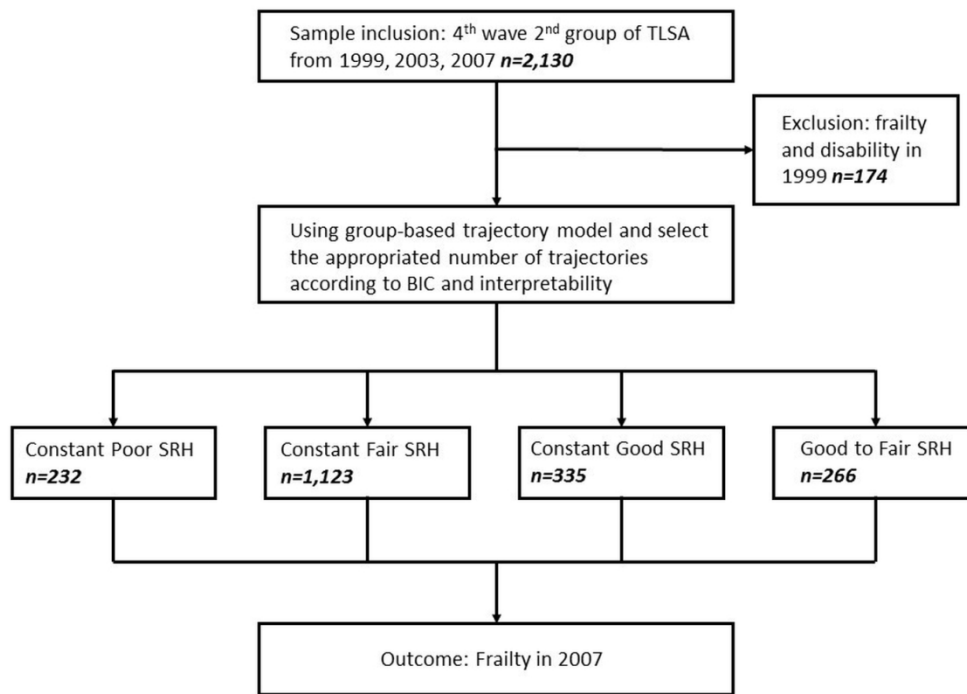

Figure 1. Flow chart of the study design

1  
2  
3  
4  
5  
6  
7  
8  
9  
10  
11  
12  
13  
14  
15  
16  
17  
18  
19  
20  
21  
22  
23  
24  
25  
26  
27  
28  
29  
30  
31  
32  
33  
34  
35  
36  
37  
38  
39  
40  
41  
42  
43  
44  
45  
46  
47  
48  
49  
50  
51  
52  
53  
54  
55  
56  
57  
58  
59  
60



Figure 2. Trajectories of Self-Rated Health score between 1999 and 2007

# Reporting checklist for cohort study.

Based on the STROBE cohort guidelines.

## Instructions to authors

Complete this checklist by entering the page numbers from your manuscript where readers will find each of the items listed below.

Your article may not currently address all the items on the checklist. Please modify your text to include the missing information. If you are certain that an item does not apply, please write "n/a" and provide a short explanation.

Upload your completed checklist as an extra file when you submit to a journal.

In your methods section, say that you used the STROBE cohort reporting guidelines, and cite them as:

von Elm E, Altman DG, Egger M, Pocock SJ, Gøtzsche PC, Vandenbroucke JP. The Strengthening of Reporting of Observational Studies in Epidemiology (STROBE) Statement: guidelines for reporting observational studies.

|                           |                     |                                                                                    | Page<br>Number |
|---------------------------|---------------------|------------------------------------------------------------------------------------|----------------|
| <b>Title and abstract</b> |                     |                                                                                    |                |
| Title                     | <a href="#">#1a</a> | Indicate the study's design with a commonly used term in the title or the abstract | 1              |
| Abstract                  | <a href="#">#1b</a> | Provide in the abstract an informative and balanced summary                        | 3              |

of what was done and what was found

## Introduction

|                           |                    |                                                                                      |   |
|---------------------------|--------------------|--------------------------------------------------------------------------------------|---|
| Background /<br>rationale | <a href="#">#2</a> | Explain the scientific background and rationale for the investigation being reported | 5 |
| Objectives                | <a href="#">#3</a> | State specific objectives, including any prespecified hypotheses                     | 6 |

## Methods

|                               |                     |                                                                                                                                                                                                                                                                      |     |
|-------------------------------|---------------------|----------------------------------------------------------------------------------------------------------------------------------------------------------------------------------------------------------------------------------------------------------------------|-----|
| Study design                  | <a href="#">#4</a>  | Present key elements of study design early in the paper                                                                                                                                                                                                              | 6   |
| Setting                       | <a href="#">#5</a>  | Describe the setting, locations, and relevant dates, including periods of recruitment, exposure, follow-up, and data collection                                                                                                                                      | 6   |
| Eligibility criteria          | <a href="#">#6a</a> | Give the eligibility criteria, and the sources and methods of selection of participants. Describe methods of follow-up.                                                                                                                                              | 7   |
| Eligibility criteria          | <a href="#">#6b</a> | For matched studies, give matching criteria and number of exposed and unexposed                                                                                                                                                                                      | n/a |
| Variables                     | <a href="#">#7</a>  | Clearly define all outcomes, exposures, predictors, potential confounders, and effect modifiers. Give diagnostic criteria, if applicable                                                                                                                             | 7   |
| Data sources /<br>measurement | <a href="#">#8</a>  | For each variable of interest give sources of data and details of methods of assessment (measurement). Describe comparability of assessment methods if there is more than one group. Give information separately for for exposed and unexposed groups if applicable. | 7   |

|    |                |                      |                                                                   |   |
|----|----------------|----------------------|-------------------------------------------------------------------|---|
| 1  | Bias           | <a href="#">#9</a>   | Describe any efforts to address potential sources of bias         | 7 |
| 2  |                |                      |                                                                   |   |
| 3  |                |                      |                                                                   |   |
| 4  | Study size     | <a href="#">#10</a>  | Explain how the study size was arrived at                         | 7 |
| 5  |                |                      |                                                                   |   |
| 6  |                |                      |                                                                   |   |
| 7  | Quantitative   | <a href="#">#11</a>  | Explain how quantitative variables were handled in the            | 7 |
| 8  | variables      |                      | analyses. If applicable, describe which groupings were chosen,    |   |
| 9  |                |                      | and why                                                           |   |
| 10 |                |                      |                                                                   |   |
| 11 |                |                      |                                                                   |   |
| 12 |                |                      |                                                                   |   |
| 13 |                |                      |                                                                   |   |
| 14 |                |                      |                                                                   |   |
| 15 | Statistical    | <a href="#">#12a</a> | Describe all statistical methods, including those used to control |   |
| 16 | methods        |                      | for confounding                                                   |   |
| 17 |                |                      |                                                                   |   |
| 18 |                |                      |                                                                   |   |
| 19 |                |                      |                                                                   |   |
| 20 | 8              |                      |                                                                   |   |
| 21 |                |                      |                                                                   |   |
| 22 |                |                      |                                                                   |   |
| 23 | Statistical    | <a href="#">#12b</a> | Describe any methods used to examine subgroups and                | 8 |
| 24 | methods        |                      | interactions                                                      |   |
| 25 |                |                      |                                                                   |   |
| 26 |                |                      |                                                                   |   |
| 27 |                |                      |                                                                   |   |
| 28 |                |                      |                                                                   |   |
| 29 | Statistical    | <a href="#">#12c</a> | Explain how missing data were addressed                           | 8 |
| 30 | methods        |                      |                                                                   |   |
| 31 |                |                      |                                                                   |   |
| 32 |                |                      |                                                                   |   |
| 33 |                |                      |                                                                   |   |
| 34 | Statistical    | <a href="#">#12d</a> | If applicable, explain how loss to follow-up was addressed        | 8 |
| 35 | methods        |                      |                                                                   |   |
| 36 |                |                      |                                                                   |   |
| 37 |                |                      |                                                                   |   |
| 38 |                |                      |                                                                   |   |
| 39 | Statistical    | <a href="#">#12e</a> | Describe any sensitivity analyses                                 |   |
| 40 | methods        |                      |                                                                   |   |
| 41 |                |                      |                                                                   |   |
| 42 |                |                      |                                                                   |   |
| 43 |                |                      |                                                                   |   |
| 44 |                |                      |                                                                   |   |
| 45 | 8              |                      |                                                                   |   |
| 46 |                |                      |                                                                   |   |
| 47 |                |                      |                                                                   |   |
| 48 | <b>Results</b> |                      |                                                                   |   |
| 49 |                |                      |                                                                   |   |
| 50 |                |                      |                                                                   |   |
| 51 | Participants   | <a href="#">#13a</a> | Report numbers of individuals at each stage of study—eg           | 9 |
| 52 |                |                      | numbers potentially eligible, examined for eligibility, confirmed |   |
| 53 |                |                      | eligible, included in the study, completing follow-up, and        |   |
| 54 |                |                      | analysed. Give information separately for for exposed and         |   |
| 55 |                |                      |                                                                   |   |
| 56 |                |                      |                                                                   |   |
| 57 |                |                      |                                                                   |   |
| 58 |                |                      |                                                                   |   |
| 59 |                |                      |                                                                   |   |
| 60 |                |                      |                                                                   |   |

unexposed groups if applicable.

|    |                  |                      |                                                               |
|----|------------------|----------------------|---------------------------------------------------------------|
| 1  |                  |                      |                                                               |
| 2  |                  |                      |                                                               |
| 3  |                  |                      |                                                               |
| 4  | Participants     | <a href="#">#13b</a> | Give reasons for non-participation at each stage 9            |
| 5  |                  |                      |                                                               |
| 6  | Participants     | <a href="#">#13c</a> | Consider use of a flow diagram                                |
| 7  |                  |                      |                                                               |
| 8  |                  |                      |                                                               |
| 9  |                  |                      |                                                               |
| 10 | 9                |                      |                                                               |
| 11 |                  |                      |                                                               |
| 12 |                  |                      |                                                               |
| 13 | Descriptive data | <a href="#">#14a</a> | Give characteristics of study participants (eg demographic, 9 |
| 14 |                  |                      |                                                               |
| 15 |                  |                      | clinical, social) and information on exposures and potential  |
| 16 |                  |                      | confounders. Give information separately for exposed and      |
| 17 |                  |                      | unexposed groups if applicable.                               |
| 18 |                  |                      |                                                               |
| 19 |                  |                      |                                                               |
| 20 |                  |                      |                                                               |
| 21 |                  |                      |                                                               |
| 22 | Descriptive data | <a href="#">#14b</a> | Indicate number of participants with missing data for each    |
| 23 |                  |                      | variable of interest                                          |
| 24 |                  |                      |                                                               |
| 25 |                  |                      |                                                               |
| 26 |                  |                      |                                                               |
| 27 |                  |                      |                                                               |
| 28 | 12               |                      |                                                               |
| 29 |                  |                      |                                                               |
| 30 |                  |                      |                                                               |
| 31 | Descriptive data | <a href="#">#14c</a> | Summarise follow-up time (eg, average and total amount)       |
| 32 |                  |                      |                                                               |
| 33 |                  |                      |                                                               |
| 34 | 9                |                      |                                                               |
| 35 |                  |                      |                                                               |
| 36 |                  |                      |                                                               |
| 37 | Outcome data     | <a href="#">#15</a>  | Report numbers of outcome events or summary measures          |
| 38 |                  |                      | over time. Give information separately for exposed and        |
| 39 |                  |                      | unexposed groups if applicable.                               |
| 40 |                  |                      |                                                               |
| 41 |                  |                      |                                                               |
| 42 |                  |                      |                                                               |
| 43 |                  |                      |                                                               |
| 44 |                  |                      |                                                               |
| 45 | 9                |                      |                                                               |
| 46 |                  |                      |                                                               |
| 47 |                  |                      |                                                               |
| 48 | Main results     | <a href="#">#16a</a> | Give unadjusted estimates and, if applicable, confounder- 9   |
| 49 |                  |                      |                                                               |
| 50 |                  |                      | adjusted estimates and their precision (eg, 95% confidence    |
| 51 |                  |                      | interval). Make clear which confounders were adjusted for and |
| 52 |                  |                      | why they were included                                        |
| 53 |                  |                      |                                                               |
| 54 |                  |                      |                                                               |
| 55 |                  |                      |                                                               |
| 56 |                  |                      |                                                               |
| 57 |                  |                      |                                                               |
| 58 | Main results     | <a href="#">#16b</a> | Report category boundaries when continuous variables were 9   |
| 59 |                  |                      |                                                               |
| 60 |                  |                      |                                                               |

|    |                          |                                                                                        |    |
|----|--------------------------|----------------------------------------------------------------------------------------|----|
| 1  |                          | categorized                                                                            |    |
| 2  |                          |                                                                                        |    |
| 3  |                          |                                                                                        |    |
| 4  | Main results             | <a href="#">#16c</a> If relevant, consider translating estimates of relative risk into |    |
| 5  |                          |                                                                                        |    |
| 6  |                          | absolute risk for a meaningful time period                                             |    |
| 7  |                          |                                                                                        |    |
| 8  |                          |                                                                                        |    |
| 9  | n/a                      |                                                                                        |    |
| 10 |                          |                                                                                        |    |
| 11 |                          |                                                                                        |    |
| 12 | Other analyses           | <a href="#">#17</a> Report other analyses done—eg analyses of subgroups and            | 9  |
| 13 |                          |                                                                                        |    |
| 14 |                          | interactions, and sensitivity analyses                                                 |    |
| 15 |                          |                                                                                        |    |
| 16 |                          |                                                                                        |    |
| 17 | <b>Discussion</b>        |                                                                                        |    |
| 18 |                          |                                                                                        |    |
| 19 |                          |                                                                                        |    |
| 20 | Key results              | <a href="#">#18</a> Summarise key results with reference to study objectives           | 11 |
| 21 |                          |                                                                                        |    |
| 22 |                          |                                                                                        |    |
| 23 | Limitations              | <a href="#">#19</a> Discuss limitations of the study, taking into account sources of   | 13 |
| 24 |                          |                                                                                        |    |
| 25 |                          | potential bias or imprecision. Discuss both direction and                              |    |
| 26 |                          |                                                                                        |    |
| 27 |                          | magnitude of any potential bias.                                                       |    |
| 28 |                          |                                                                                        |    |
| 29 |                          |                                                                                        |    |
| 30 |                          |                                                                                        |    |
| 31 | Interpretation           | <a href="#">#20</a> Give a cautious overall interpretation considering objectives,     | 13 |
| 32 |                          |                                                                                        |    |
| 33 |                          | limitations, multiplicity of analyses, results from similar studies,                   |    |
| 34 |                          |                                                                                        |    |
| 35 |                          | and other relevant evidence.                                                           |    |
| 36 |                          |                                                                                        |    |
| 37 |                          |                                                                                        |    |
| 38 |                          |                                                                                        |    |
| 39 | Generalisability         | <a href="#">#21</a> Discuss the generalisability (external validity) of the study      | 14 |
| 40 |                          |                                                                                        |    |
| 41 |                          | results                                                                                |    |
| 42 |                          |                                                                                        |    |
| 43 |                          |                                                                                        |    |
| 44 | <b>Other Information</b> |                                                                                        |    |
| 45 |                          |                                                                                        |    |
| 46 |                          |                                                                                        |    |
| 47 | Funding                  | <a href="#">#22</a> Give the source of funding and the role of the funders for the     | 16 |
| 48 |                          |                                                                                        |    |
| 49 |                          | present study and, if applicable, for the original study on which                      |    |
| 50 |                          |                                                                                        |    |
| 51 |                          | the present article is based                                                           |    |
| 52 |                          |                                                                                        |    |
| 53 |                          |                                                                                        |    |
| 54 |                          |                                                                                        |    |
| 55 |                          |                                                                                        |    |
| 56 |                          |                                                                                        |    |
| 57 |                          |                                                                                        |    |
| 58 |                          |                                                                                        |    |
| 59 |                          |                                                                                        |    |
| 60 |                          |                                                                                        |    |

1 The STROBE checklist is distributed under the terms of the Creative Commons Attribution License  
2  
3 CC-BY. This checklist was completed on 01. February 2021 using <https://www.goodreports.org/>, a  
4  
5 tool made by the [EQUATOR Network](#) in collaboration with [Penelope.ai](#)  
6  
7  
8  
9  
10  
11  
12  
13  
14  
15  
16  
17  
18  
19  
20  
21  
22  
23  
24  
25  
26  
27  
28  
29  
30  
31  
32  
33  
34  
35  
36  
37  
38  
39  
40  
41  
42  
43  
44  
45  
46  
47  
48  
49  
50  
51  
52  
53  
54  
55  
56  
57  
58  
59  
60
